# Supplementary material for: A Short-Term Feeding of Dietary Casein Increases Abundance of Lactococcus lactis and Upregulates Gene Expression Involving Obesity Prevention in Cecum of Young Rats Compared With Dietary Chicken Protein
Source: Front Microbiol. 2019 Oct 25;10:2411. doi: 10.3389/fmicb.2019.02411 (PMC6824296; doi:10.3389/fmicb.2019.02411)
Supplement: TABLE S4 — Differential analysis based on DESeq2 at the genus and species level. [file Table_4.XLSX]

## Sheet: res.casein_chicken_genus_done_b
	Differential analysis based on DESeq2 at the genus level									Differential analysis based on DESeq2 at the species level
		baseMean	log2FoldChange	lfcSE	stat	pvalue	padj				baseMean	log2FoldChange	lfcSE	stat	pvalue	padj
	Lactococcus	26667	-7.81051	0.763584	-10.2288	1.47407e-24	8.2253e-22			Lactococcus_lactis	28247.7	-7.97829	0.822465	-9.70047	3.00116e-22	4.86188e-19
	Tetragenococcus	15.9443	-3.6036	0.96475	-3.73527	0.000187517	0.0523172			Lactococcus_garvieae	105.778	-4.9975	0.783636	-6.37733	1.80206e-10	1.45967e-07
	Listeria	57.6312	-2.56279	0.753077	-3.4031	0.000666268	0.123926			Enterococcus_sp_7L76	84.4088	-5.76446	0.918651	-6.27491	3.49833e-10	1.8891e-07
	Escherichia	2263.41	-3.42939	1.15138	-2.9785	0.00289659	0.275818			Streptococcus_thermophilus	273.314	-3.87981	0.648033	-5.98705	2.1368e-09	8.65402e-07
	Allobaculum	21.5254	-4.03761	1.35889	-2.97126	0.00296578	0.275818			Streptococcus_macedonicus	54.7626	-3.83724	0.766396	-5.00686	5.53247e-07	0.000149377
	Erysipelothrix	33.1326	-2.31292	0.76492	-3.02374	0.00249671	0.275818			Streptococcus_infantarius	51.4112	-4.01407	0.798653	-5.02605	5.0068e-07	0.000149377
	Turicibacter	17.2194	-4.24496	1.50785	-2.81523	0.00487423	0.319587			Weissella_thailandensis	17.7534	-5.74529	1.41075	-4.07251	4.65096e-05	0.00941819
	Marinilabilia	10.7418	3.40509	1.20602	2.82342	0.0047515	0.319587			Tetragenococcus_halophilus	16.4012	-3.71975	0.961968	-3.86681	0.000110267	0.019848
	Papillibacter	54.8394	1.90465	0.680911	2.79721	0.00515463	0.319587			Bifidobacterium_pseudolongum	36.139	-4.56533	1.26937	-3.59652	0.000322502	0.0522453
	Candidatus Desulforudis	7.66672	4.62446	1.67388	2.76272	0.00573226	0.31986			Listeria_monocytogenes	48.141	-2.81604	0.796119	-3.53721	0.000404384	0.0595548
	Weissella	28.1647	-2.08446	0.787204	-2.64793	0.00809864	0.410822			Lactobacillus_murinus	42.9732	-2.79907	0.810392	-3.45397	0.000552406	0.0745747
	Collinsella	2.46517	-4.68431	1.90675	-2.4567	0.0140218	0.601858			Allobaculum_stercoricanis	19.1865	-5.19932	1.54905	-3.35647	0.000789451	0.0983777
	Marinilactibacillus	25.6754	-2.36549	0.961151	-2.4611	0.0138512	0.601858			Leuconostoc_citreum	20.6499	-3.15611	0.997446	-3.16419	0.00155513	0.179951
	Coprobacillus	13.7777	-2.50282	1.04832	-2.38747	0.016965	0.676177			Erysipelothrix_rhusiopathiae	32.1944	-2.50043	0.815369	-3.06662	0.00216491	0.23381
	Phormidium	2.16832	-4.49894	2.00485	-2.24403	0.0248306	0.769749			Lactobacillus_paracasei	10.3001	-3.54267	1.16669	-3.03651	0.00239336	0.242328
	Akkermansia	54803.5	3.34648	1.48605	2.25192	0.0243272	0.769749			Bifidobacterium_breve	27.5246	-2.10889	0.719934	-2.92928	0.00339747	0.323759
	Shigella	318.501	-3.10704	1.34691	-2.30679	0.0210666	0.769749			Escherichia_coli	2182.46	-3.33989	1.18506	-2.81832	0.00482758	0.411614
	Salmonella	15.1334	-2.64705	1.16466	-2.27281	0.0230377	0.769749			Lactobacillus_acidophilus	9571.6	-3.24428	1.14842	-2.82499	0.00472823	0.411614
	Chryseobacterium	20.8847	2.52673	1.15148	2.19433	0.0282117	0.790216			Turicibacter_sanguinis	16.3873	-4.27368	1.52946	-2.79425	0.00520201	0.421363
	Methanosaeta	3.95319	-5.37665	2.45198	-2.19278	0.0283232	0.790216			Lactobacillus_casei	120.485	-1.94104	0.703227	-2.76018	0.00577689	0.445646
	Mycobacterium	8.77639	-2.03943	0.953542	-2.1388	0.0324521	0.841647			Clostridium_sp_P1-2-2	4.90928	3.79	1.46968	2.5788	0.00991453	0.61215
	Oscillospira	198.693	1.55096	0.7282	2.12986	0.0331832	0.841647			Oscillospira_sp_A	17.2495	2.26882	0.885462	2.5623	0.010398	0.61215
	Atopobium	3.61335	-4.19853	2.01004	-2.08878	0.0367272	0.891035			Lachnospiraceae_bacterium_609	272.457	-1.81424	0.706301	-2.56866	0.0102094	0.61215
	Caldanaerobacter	0.431992	-2.18143	3.76766	-0.578988	0.562597	0.987029			Coprobacillus_cateniformis	13.9817	-2.68656	1.03159	-2.6043	0.00920635	0.61215
	Johnsonella	15.0227	-0.30016	0.796772	-0.376721	0.706381	0.987029			Shigella_dysenteriae	16.8715	-3.45864	1.33977	-2.58152	0.00983658	0.61215
	Herminiimonas	1.44719	-1.67506	2.15391	-0.777685	0.436755	0.987029			Lactobacillus_animalis	25.4934	-2.35281	0.92041	-2.55626	0.0105804	0.61215
	Capnocytophaga	11.8704	0.481813	0.978949	0.492174	0.622596	0.987029			Listeria_innocua	9.90082	-2.65327	1.0159	-2.61175	0.00900812	0.61215
	Thermodesulfovibrio	0.341417	2.04768	4.03941	0.506926	0.612207	0.987029			Marinilabilia_salmonicolor	7.50792	3.42311	1.35313	2.52978	0.0114135	0.625172
	Candidatus Symbiothrix	3.84634	1.61951	1.41867	1.14157	0.253634	0.987029			Candidatus_Desulforudis_audaxviator	6.9761	4.30768	1.70616	2.52477	0.0115773	0.625172
	Eubacterium	6121.7	-0.107474	0.624764	-0.172024	0.863419	0.987029			bacterium_NLAE-zl-G492	24.4582	1.90218	0.769807	2.47099	0.013474	0.681931
	Candidatus Portiera	4.80429	-0.0616425	1.25545	-0.0490999	0.96084	0.987029			Lachnospiraceae_bacterium_539	70.8699	1.61506	0.662217	2.43887	0.0147331	0.681931
	Alicycliphilus	0.336892	-1.79748	4.02564	-0.446508	0.65523	0.987029			Lachnospiraceae_bacterium_538	50.8028	-2.25691	0.921252	-2.44983	0.0142924	0.681931
	Cryptobacterium	1.30797	-0.636108	2.4169	-0.263191	0.792403	0.987029			Oscillospira_sp_H	16.6716	2.00505	0.811464	2.47091	0.0134769	0.681931
	Alkalitalea	4.73465	2.28301	1.62689	1.4033	0.160528	0.987029			Helicobacter_sp_'pancake_tortoise'	3.74243	-4.34013	1.77277	-2.44822	0.0143563	0.681931
	Parasporobacterium	6.7424	0.0773816	1.34148	0.0576838	0.954	0.987029			Mycobacterium_leprae	8.77845	-2.49646	1.0293	-2.42539	0.015292	0.688138
	Planococcus	0.772668	-1.70457	3.18289	-0.535541	0.592276	0.987029			Clostridium_cellobioparum	20.0664	1.9012	0.789671	2.40759	0.0160582	0.703087
	Croceibacter	0.343821	2.0564	4.03862	0.509183	0.610624	0.987029			Staphylococcus_capitis	5.62279	-3.47321	1.47079	-2.36145	0.0182036	0.77605
	Eggerthella	52.1984	-0.361416	0.664184	-0.544151	0.586337	0.987029			Enterococcus_faecalis	895.786	-1.3428	0.575774	-2.33216	0.0196922	0.783553
	Solibacillus	6.55426	0.180624	1.0542	0.171338	0.863958	0.987029			Streptococcus_pleomorphus	2.97257	-5.00646	2.14229	-2.33696	0.0194412	0.783553
	Desulfomonile	5.0363	-1.95506	1.28201	-1.52499	0.127261	0.987029			Marinilactibacillus_psychrotolerans	16.007	-2.6137	1.12198	-2.32954	0.0198307	0.783553
	Slackia	2.05634	-3.32587	1.95116	-1.70456	0.0882772	0.987029			Clostridiales_bacterium_DJF_CP67	7.1686	-2.66276	1.15113	-2.31317	0.020713	0.798931
	Lactobacillus	125051	0.308729	1.21166	0.254799	0.798878	0.987029			Clostridium-like_species	6.71498	3.1334	1.36388	2.29741	0.0215954	0.813593
	Adlercreutzia	19.2892	0.129733	0.807521	0.160655	0.872365	0.987029			Erysipelothrix_tonsillarum	4.14029	-3.56172	1.56619	-2.27413	0.0229579	0.845269
	Thiomonas	2.19777	-0.18595	2.11884	-0.0877602	0.930067	0.987029			Lachnospiraceae_bacterium_615	65.9198	1.53018	0.675681	2.26465	0.0235343	0.847236
	Globicatella	2.15011	0.931458	1.66657	0.558907	0.576225	0.987029			Papillibacter_cinnamivorans	53.8275	1.61945	0.722056	2.24283	0.0249075	0.858515
	Bergeyella	0.495612	1.09532	3.24886	0.33714	0.736011	0.987029			Treponema_denticola	8.50538	-2.47347	1.10119	-2.24618	0.0246924	0.858515
	Salinisphaera	1.14109	0.548311	2.24274	0.244483	0.806857	0.987029			Salmonella_enterica	14.1779	-2.56363	1.16395	-2.20252	0.0276283	0.868508
	Actinobacillus	43.2659	-0.691569	0.718446	-0.962591	0.335753	0.987029			Oscillibacter_sp_G2	207.106	1.66357	0.76165	2.18416	0.0289503	0.868508
	Rummeliibacillus	0.346765	0.207902	4.08047	0.0509504	0.959365	0.987029			Streptococcus_equinus	6.01377	-2.64832	1.21003	-2.18865	0.0286225	0.868508
	Desmospora	0.820496	-0.406375	2.75945	-0.147266	0.882922	0.987029			Eubacterium_coprostanoligenes	163.812	-1.48438	0.671256	-2.21135	0.0270116	0.868508
	Sedimentibacter	2.0818	2.49547	2.06322	1.2095	0.226471	0.987029			rumen_bacterium_2/9293-15	3.9459	3.41765	1.54472	2.21247	0.0269343	0.868508
	Agromyces	0.344361	0.207902	4.08047	0.0509504	0.959365	0.987029			Streptococcus_dysgalactiae	63.0359	-1.6071	0.731076	-2.19827	0.0279301	0.868508
	Bordetella	2.88107	-1.17999	1.72821	-0.682779	0.494747	0.987029			Clostridium_sp_ID4	44.6001	-2.09508	0.955514	-2.19263	0.0283343	0.868508
	Haliangium	0.47319	1.08727	3.29564	0.32991	0.741468	0.987029			Methanosaeta_concilii	4.07587	-5.50149	2.53757	-2.16802	0.0301574	0.872411
	Flavobacterium	37.3407	-0.261186	0.87234	-0.299409	0.764628	0.987029			Clostridium_ruminantium	32.6849	-2.5601	1.1797	-2.17012	0.0299978	0.872411
	Desulfomicrobium	17.0764	0.0889447	0.819191	0.108576	0.913539	0.987029			Shigella_flexneri	107.041	-3.17704	1.48117	-2.14496	0.031956	0.908224
	Klebsiella	4.07965	-1.93748	1.68272	-1.1514	0.249568	0.987029			Lachnospiraceae_bacterium_28-4	317.292	-1.48808	0.699067	-2.12866	0.0332822	0.913851
	Pedobacter	4.85276	0.392118	1.28657	0.304779	0.760535	0.987029			Clostridium_termitidis	10.8604	1.9949	0.934305	2.13517	0.0327469	0.913851
	Chlorobium	0.320237	-1.7329	4.03099	-0.429894	0.667273	0.987029			Staphylococcus_cohnii	8.83217	-2.85855	1.35001	-2.11743	0.0342236	0.924036
	Barnesiella	110.404	1.44997	0.948957	1.52796	0.126523	0.987029			Lactobacillus_alimentarius	3.60517	3.44286	1.63741	2.10262	0.0354988	0.94026
	Syntrophomonas	5.9487	-0.527211	1.01527	-0.519281	0.603565	0.987029			Alkalibacterium_olivapovliticus	6.82894	-2.33716	1.11448	-2.09709	0.0359853	0.94026
	Arcanobacterium	0.310092	0.207902	4.08047	0.0509504	0.959365	0.987029			Sporosarcina_globispora	9.85326	2.10038	1.01209	2.0753	0.037959	0.948108
	Trichococcus	1.77253	-2.06758	1.83453	-1.12704	0.259727	0.987029			Clostridium_innocuum	6.42586	-2.22853	1.0707	-2.08138	0.0373994	0.948108
	Aneurinibacillus	5.29389	0.464255	1.1061	0.419723	0.674688	0.987029			Clostridium_sp_MSTE9	8.22864	-2.0592	0.992667	-2.07441	0.0380414	0.948108
	Caulobacter	0.310092	0.207902	4.08047	0.0509504	0.959365	0.987029			Akkermansia_muciniphila	56962.4	3.05745	1.58315	1.93124	0.053453	0.95909
	Granulibacter	0.637799	0.289626	2.72351	0.106343	0.91531	0.987029			Pseudomonas_putida	4.03838	-2.89743	1.43477	-2.01943	0.0434422	0.95909
	Sulfurospirillum	0.931861	0.193545	2.63838	0.0733574	0.941522	0.987029			bacterium_NLAE-zl-G70	4.55751	3.19274	1.55994	2.0467	0.0406872	0.95909
	Verrucosispora	0.307689	0.207902	4.08047	0.0509504	0.959365	0.987029			Allobaculum_sp_GK12	6.89777	-3.22144	1.61102	-1.99963	0.0455405	0.95909
	Pandoraea	0.336892	-1.79748	4.02564	-0.446508	0.65523	0.987029			bacterium_NLAE-zl-C313	11.4598	-2.04197	1.00993	-2.02188	0.0431883	0.95909
	Lysinibacillus	7.68755	-1.10817	1.04538	-1.06006	0.289116	0.987029			bacterium_NLAE-zl-C141	10.7319	-2.20759	1.11217	-1.98493	0.047152	0.95909
	Seinonella	5.27353	0.138486	1.02838	0.134664	0.892877	0.987029			Peptostreptococcaceae_bacterium_TM5	28.0224	-2.33251	1.15895	-2.01259	0.0441573	0.95909
	Sporobacter	61.7049	1.26287	0.812005	1.55525	0.119886	0.987029			Lactobacillus_buchneri	17.8738	-1.67917	0.843192	-1.99144	0.0464322	0.95909
	Runella	11.6711	0.607411	1.06513	0.570272	0.568494	0.987029			Rhodopseudomonas_palustris	7.25075	-2.23623	1.14443	-1.95402	0.0506992	0.95909
	Butyricicoccus	7.17488	-0.236532	1.1065	-0.213766	0.83073	0.987029			Alicyclobacillus_acidoterrestris	57.8352	1.43273	0.733643	1.9529	0.0508315	0.95909
	Pseudogulbenkiania	2.21023	-1.06747	1.96178	-0.54413	0.586352	0.987029			Oscillospiraceae_bacterium_AIP_653_10	22.8726	1.68965	0.840156	2.01112	0.0443133	0.95909
	Thermincola	1.6169	-1.86403	1.90944	-0.976222	0.328955	0.987029			Ruminococcus_sp_DJF_VR87	11.5937	-1.90333	0.980965	-1.94026	0.0523476	0.95909
	Oxobacter	4.51744	-2.48772	1.47826	-1.68286	0.0924016	0.987029			Lachnospiraceae_bacterium_A2	43.1838	-1.57351	0.793623	-1.9827	0.0474012	0.95909
	Sutterella	3.16232	-1.07654	1.8013	-0.597647	0.550076	0.987029			[Clostridium]_sordellii	71.7236	-2.2651	1.15981	-1.953	0.0508196	0.95909
	Lachnoanaerobaculum	6.11591	0.217155	0.985595	0.220329	0.825615	0.987029			Shigella_sonnei	106.364	-2.86469	1.47356	-1.94406	0.0518885	0.95909
	Lyngbya	0.303583	-1.66611	4.03678	-0.412732	0.679803	0.987029			Ruminococcus_sp_DJF_VR70k1	13.9478	-1.82982	0.939898	-1.94682	0.0515557	0.95909
	Albidiferax	0.346765	0.207902	4.08047	0.0509504	0.959365	0.987029			Neisseria_meningitidis	12.2248	-1.73745	0.887308	-1.95811	0.0502169	0.95909
	Desulfonatronum	1.86922	0.408666	1.90856	0.214122	0.830452	0.987029			rumen_bacterium_NK4A153	4.524	2.74152	1.41175	1.94193	0.0521452	0.95909
	Salinispora	3.20875	-0.0485788	1.36644	-0.0355513	0.97164	0.987029			Shigella_boydii	78.2266	-2.91403	1.43959	-2.02421	0.0429486	0.95909
	Megasphaera	160.767	0.118679	0.592109	0.200435	0.841141	0.987029			Anaerotruncus_sp_G3	13.7286	-2.11579	1.07386	-1.97027	0.0488074	0.95909
	Bulleidia	0.862664	2.13556	2.72977	0.782322	0.434025	0.987029			Propionibacterium_acnes	2.80463	-3.91546	2.03101	-1.92784	0.0538748	0.95909
	Rahnella	0.333948	0.207902	4.08047	0.0509504	0.959365	0.987029			Verrucomicrobia_bacterium_MS-B-22	8.14911	3.11955	1.61353	1.93337	0.0531902	0.95909
	Thermohydrogenium	0.351831	2.08553	4.03603	0.516728	0.605346	0.987029			Clostridiales_bacterium_canine_oral_taxon_217	25.936	1.56632	0.791422	1.97912	0.0478028	0.95909
	Peptococcus	39.5934	0.267972	0.725518	0.369352	0.711865	0.987029			Lachnospiraceae_bacterium_6-1	37.8666	-1.7033	0.83242	-2.0462	0.040737	0.95909
	Nevskia	0.263546	-1.48974	4.05335	-0.367532	0.713222	0.987029			Clostridium_sp_K39	48.8577	-2.29922	1.14212	-2.01311	0.0441029	0.95909
	Agrobacterium	1.73326	3.27877	2.06986	1.58405	0.113182	0.987029			Clostridiales_bacterium_CIEAF_021	216.879	1.5689	0.813061	1.92962	0.053654	0.95909
	Gordonia	0.310092	0.207902	4.08047	0.0509504	0.959365	0.987029			bacterium_B3C1-5	2.79522	3.93595	2.06567	1.90541	0.0567265	0.959849
	Sphingomonas	8.06838	-1.85582	1.04706	-1.77242	0.0763252	0.987029			bacterium_WH2-11	10.284	-3.09896	1.65901	-1.86795	0.0617684	0.959849
	Arthrospira	0.303583	-1.66611	4.03678	-0.412732	0.679803	0.987029			Bacteroides_caccae	53.9918	-2.54833	1.3292	-1.91719	0.0552138	0.959849
	Paraeggerthella	0.698902	-2.88035	3.15433	-0.913141	0.361168	0.987029			Clostridium_maritimum	18.2274	-2.32833	1.24538	-1.86957	0.0615437	0.959849
	Brachybacterium	0.283565	-1.57992	4.04463	-0.390622	0.696077	0.987029			swine_fecal_bacterium_RF2C-Pec1	2.91027	-3.95236	2.07279	-1.90678	0.0565487	0.959849
	Thermolithobacter	0.283565	-1.57992	4.04463	-0.390622	0.696077	0.987029			Oxobacter_pfennigii	4.91284	-2.76057	1.47798	-1.8678	0.0617905	0.959849
	Anaerostipes	102.983	0.56045	0.781546	0.717104	0.47331	0.987029			Clostridium_sp_6-30	6.77592	2.03499	1.06549	1.90991	0.0561445	0.959849
	Leuconostoc	52.7994	-1.04344	0.677404	-1.54035	0.123476	0.987029			Meiothermus_silvanus	3.50773	-2.62913	1.38279	-1.90132	0.0572604	0.959849
	Syntrophobotulus	17.3524	-0.966154	0.725771	-1.33121	0.18312	0.987029			Ruminococcus_sp_SR1/5	454.434	-1.33649	0.703586	-1.89954	0.057494	0.959849
	Gelria	0.845049	2.14129	3.09747	0.691304	0.489375	0.987029			Parabacteroides_sp_dnLKV8	8.93153	-2.88792	1.52786	-1.89018	0.0587342	0.959849
	Acholeplasma	0.482795	1.04907	3.69351	0.28403	0.776387	0.987029			butyrate-producing_bacterium_PH07BY04	2.9599	2.95918	1.58688	1.86478	0.0622124	0.959849
	Desulfonatronospira	0.502393	-0.8311	3.65397	-0.227451	0.820073	0.987029			Lactobacillales_bacterium_DJF_B280	104.882	1.47204	0.785932	1.87299	0.0610697	0.959849
	Halovibrio	0.317293	0.207902	4.08047	0.0509504	0.959365	0.987029			Acidobacteriaceae_bacterium_K22	7.00688	2.08521	1.10557	1.8861	0.0592821	0.959849
	Streptococcus	5306.97	-0.537039	0.569947	-0.942261	0.346059	0.987029			Sphingomonas_sp_KT0216	8.55529	-1.97955	1.05075	-1.88393	0.0595743	0.959849
	Syntrophothermus	10.4309	-0.259225	0.926506	-0.279788	0.77964	0.987029			Barnesiella_sp_NSB1	13.6418	2.16145	1.16233	1.85958	0.0629447	0.961985
	Yersinia	0.83133	0.797274	3.09676	0.257454	0.796828	0.987029			Ruminococcus_sp_RLB2	10.7222	-1.70103	0.921974	-1.84498	0.0650399	0.984716
	Pectinatus	46.74	-0.599819	1.01597	-0.590388	0.55493	0.987029			Clostridium_sp_CA6	3.93563	-1.62901	1.57728	-1.0328	0.301699	0.99403
	Anaeroarcus	0.53015	2.67652	3.50955	0.76264	0.445678	0.987029			bacterium_NLAE-zl-C474	5.93577	1.46056	1.52377	0.958516	0.337803	0.99403
	Peptoniphilus	1.39785	0.605414	1.91371	0.316356	0.751732	0.987029			bacterium_NLAE-zl-C476	7.66994	1.39703	1.01301	1.37909	0.167867	0.99403
	Oligotropha	1.35224	0.862745	1.93177	0.446609	0.655158	0.987029			bacterium_NLAE-zl-C477	5.05749	1.25358	1.31293	0.95479	0.339684	0.99403
	Telluria	0.346765	0.207902	4.08047	0.0509504	0.959365	0.987029			bacterium_NLAE-zl-C473	6.87632	1.7825	1.07012	1.6657	0.0957734	0.99403
	Histophilus	1.11424	-3.55276	2.71417	-1.30897	0.190545	0.987029			bacterium_NLAE-zl-C478	4.62737	1.91195	1.43488	1.33248	0.182702	0.99403
	Rhizobium	0.827966	0.813342	2.77958	0.292613	0.769818	0.987029			rumen_bacterium_NK3A39	5.44893	-0.64396	1.04413	-0.616741	0.537405	0.99403
	Gemmiger	7.13293	-0.241288	1.07934	-0.223552	0.823106	0.987029			Exiguobacterium_sibiricum	26.1426	-0.244518	0.693782	-0.352442	0.724507	0.99403
	Rhodococcus	3.31207	-0.446536	1.29419	-0.34503	0.730072	0.987029			Clostridium_sp_BNL1100	27.2318	0.105702	0.705494	0.149828	0.880901	0.99403
	Mucilaginibacter	2.06438	-1.63394	2.11282	-0.773346	0.439318	0.987029			Oscillibacter_sp_GH1	15.1221	0.941345	1.00129	0.940129	0.347151	0.99403
	Pseudoflavonifractor	57.0218	0.702879	0.746224	0.941915	0.346236	0.987029			rumen_bacterium_NK4A100	5.23682	1.63016	1.1544	1.41213	0.157912	0.99403
	Thermoactinomyces	9.07873	1.31839	0.991086	1.33025	0.183436	0.987029			[Ruminococcus]_obeum	5439.38	-0.316821	0.62929	-0.503458	0.614642	0.99403
	Abiotrophia	0.793428	-0.393713	2.33163	-0.168857	0.865909	0.987029			Clostridium_sp_P1-2-1	6.17738	1.95981	1.1613	1.6876	0.0914878	0.99403
	Thermosinus	1.44672	-1.62796	1.95135	-0.834276	0.404126	0.987029			Ruminococcus_sp_K-1	9.09581	-0.127438	0.871811	-0.146177	0.883782	0.99403
	Spirosoma	0.873971	3.39915	2.60683	1.30394	0.192255	0.987029			Ruminococcus_sp_ZS2-15	16.2179	-1.68879	0.933383	-1.80932	0.0704013	0.99403
	Acidaminococcus	425.968	-0.469841	0.857064	-0.548199	0.583555	0.987029			Acetitomaculum_ruminis	10.404	0.555897	0.917034	0.60619	0.544389	0.99403
	Rothia	231.104	0.297364	0.697408	0.426384	0.669828	0.987029			Clostridium_sp_MLG392	7.27312	0.580081	0.969268	0.598473	0.549524	0.99403
	Duganella	0.435356	-2.19279	3.75797	-0.583504	0.559554	0.987029			Clostridium_polysaccharolyticum	17.2072	0.318587	0.812999	0.391867	0.695156	0.99403
	Odoribacter	830.095	0.594343	1.02923	0.577464	0.563626	0.987029			Bacteroides_sp_NB-8	4.209	-2.85289	1.65044	-1.72856	0.0838875	0.99403
	Cellulophaga	3.09148	1.46064	1.67374	0.872676	0.382839	0.987029			Clostridium_sp_JL2_S	5.20991	0.27894	1.19935	0.232575	0.816091	0.99403
	Mahella	0.682834	3.04732	3.18835	0.955768	0.33919	0.987029			Butyrivibrio_hungatei	24.9381	1.3329	0.775004	1.71987	0.0854568	0.99403
	Jeotgalicoccus	0.33011	0.207902	4.08047	0.0509504	0.959365	0.987029			bacterium_NLAE-zl-C283	5.47883	0.203963	0.994119	0.20517	0.837439	0.99403
	Frateuria	0.502393	-0.8311	3.65397	-0.227451	0.820073	0.987029			Coprococcus_sp_DJF_B005	35.2686	0.35469	1.02757	0.345175	0.729963	0.99403
	Stenotrophomonas	3.82611	-1.08459	1.24338	-0.872297	0.383047	0.987029			Clostridium_sp_Sukashi-1	8.53215	0.891298	0.917431	0.971515	0.331292	0.99403
	Thermaerobacter	6.09225	1.37274	1.0893	1.26021	0.207595	0.987029			bacterium_NLAE-zl-G1	19.4242	0.438132	0.974191	0.44974	0.652898	0.99403
	Acidobacterium	0.482795	1.04907	3.69351	0.28403	0.776387	0.987029			Clostridiales_bacterium_77-5d	22.732	0.620725	0.877958	0.70701	0.47956	0.99403
	Zunongwangia	0.967641	-0.84556	2.39892	-0.352475	0.724482	0.987029			bacterium_NLAE-zl-P668	4.3789	-0.306239	1.14463	-0.267545	0.78905	0.99403
	Spirochaeta	2.21389	-1.10179	1.61465	-0.682372	0.495004	0.987029			Clostridium_carnis	7.20712	-1.61756	1.3653	-1.18476	0.236111	0.99403
	Delftia	4.94163	-0.63383	1.52157	-0.416562	0.676999	0.987029			bacterium_NLAE-zl-P661	4.61372	-0.307455	1.19075	-0.258204	0.79625	0.99403
	Thermoanaerobacter	54.1755	-0.37377	0.673636	-0.554854	0.578994	0.987029			bacterium_NLAE-zl-P663	4.47432	0.33276	1.17968	0.282077	0.777885	0.99403
	Dialister	2.18302	-0.108454	2.09864	-0.0516783	0.958785	0.987029			bacterium_NLAE-zl-P666	3.80002	0.173295	1.18986	0.145643	0.884204	0.99403
	Catabacter	1.49764	-1.69571	2.32599	-0.729028	0.465984	0.987029			bacterium_NLAE-zl-P667	3.72584	-0.313064	1.15932	-0.27004	0.787129	0.99403
	Moorella	2.46659	0.785332	1.44501	0.543479	0.5868	0.987029			Sutterella_wadsworthensis	2.76637	-1.18169	1.92981	-0.612337	0.540315	0.99403
	Cytophaga	8.90082	0.780058	1.04598	0.745765	0.455809	0.987029			rumen_bacterium_NK4A189	3.90126	1.41036	1.31969	1.06871	0.285202	0.99403
	Actinomyces	4.03477	-0.929154	1.80859	-0.513745	0.60743	0.987029			Gram-negative_bacterium_cL10-2b-4	216.259	0.817094	0.920006	0.88814	0.374466	0.99403
	Chroococcidiopsis	0.283565	-1.57992	4.04463	-0.390622	0.696077	0.987029			Butyrivibrio_sp_4C58CC	5.02372	1.33218	1.14197	1.16656	0.243387	0.99403
	Amycolatopsis	0.263546	-1.48974	4.05335	-0.367532	0.713222	0.987029			Bacteroides_sp_1B2	4.85867	-2.03534	1.67409	-1.21578	0.224067	0.99403
	Microcoleus	0.954404	-2.07014	2.40214	-0.86179	0.388803	0.987029			Staphylococcus_lugdunensis	4.29995	-1.959	1.41327	-1.38615	0.1657	0.99403
	Pelospora	0.904641	0.331956	2.65594	0.124986	0.900535	0.987029			Lactobacillus_sp_AbxANB3	4.89894	1.47978	1.6509	0.896348	0.370067	0.99403
	Halanaerobium	0.803842	-0.365132	2.51969	-0.144912	0.884781	0.987029			Lawsonia_intracellularis	542.967	0.684047	0.771443	0.886711	0.375234	0.99403
	Calothrix	0.488683	-2.34183	3.61816	-0.647243	0.517475	0.987029			Selenomonas_ruminantium	84.7564	-0.253161	0.61988	-0.408402	0.682978	0.99403
	Geobacter	19.7872	-0.659561	0.832855	-0.791928	0.428403	0.987029			Alicyclobacillus_sp_SKO2	9.01402	0.643257	1.03393	0.622145	0.533847	0.99403
	Dickeya	0.320237	-1.7329	4.03099	-0.429894	0.667273	0.987029			bacterium_NLAE-zl-H32	5.14218	-0.40279	1.07198	-0.375744	0.707107	0.99403
	Rubritalea	1.41427	2.94602	2.42789	1.21341	0.224975	0.987029			Eubacterium_eligens	382.815	0.448165	0.651591	0.687801	0.491578	0.99403
	Leadbetterella	1.64526	-1.95168	2.28221	-0.855173	0.392456	0.987029			Blautia_hydrogenotrophica	9.21338	-0.301729	0.8658	-0.348497	0.727467	0.99403
	Pseudoclavibacter	0.283565	-1.57992	4.04463	-0.390622	0.696077	0.987029			swine_fecal_bacterium_RF3G-Cel2	14.8906	0.779277	0.810163	0.961877	0.336111	0.99403
	Candidatus Contubernalis	0.317293	0.207902	4.08047	0.0509504	0.959365	0.987029			Roseburia_hominis	10887.2	-0.145913	0.586478	-0.248794	0.80352	0.99403
	Amphibacillus	87.2839	0.31179	0.583372	0.534462	0.593022	0.987029			Helicobacter_cinaedi	22.619	1.23498	1.25895	0.980963	0.326611	0.99403
	Coriobacterium	0.739681	-1.61066	2.84235	-0.566666	0.570941	0.987029			Acetobacterium_woodii	6.54934	0.378192	0.968858	0.390348	0.696279	0.99403
	Proteiniphilum	0.82956	0.705471	2.49825	0.282386	0.777647	0.987029			Bacteroides_xylanolyticus	7.50189	0.668351	0.937352	0.713021	0.475833	0.99403
	Gemella	18.405	0.0695373	0.958651	0.0725367	0.942175	0.987029			bacterium_NLAE-zl-C492	2.83699	1.54855	1.4333	1.08041	0.279961	0.99403
	Exiguobacterium	64.386	-0.372288	0.629276	-0.591613	0.55411	0.987029			[Clostridium]_lituseburense	15.0261	-1.62177	1.21445	-1.33539	0.181748	0.99403
	Heliobacterium	5.56468	-0.184302	1.01458	-0.181654	0.855854	0.987029			Eubacterium_cellulosolvens	13.32	-0.361223	0.769903	-0.46918	0.638941	0.99403
	Oceanobacillus	2.72858	-1.12772	1.54386	-0.73045	0.465115	0.987029			Spiroplasma_eriocheiris	4.02398	-0.66589	1.4996	-0.444045	0.65701	0.99403
	Allochromatium	1.7241	1.36881	2.05535	0.665972	0.505429	0.987029			Blautia_sp_BS-C2-0	5.31554	0.990658	1.06315	0.931811	0.351434	0.99403
	Ethanoligenens	81.3284	0.237513	0.573024	0.414491	0.678515	0.987029			Verrucomicrobia_bacterium_WD81	3.47516	1.80069	1.80421	0.99805	0.318255	0.99403
	Jonesia	1.09221	-1.06372	2.25434	-0.471855	0.63703	0.987029			Ruminococcus_sp_14531	7.68442	-0.841562	0.962114	-0.874701	0.381737	0.99403
	Paludibacter	7.57719	0.660916	1.2299	0.537376	0.591008	0.987029			Eubacterium_rangiferina	7.73805	0.295969	0.904033	0.327387	0.743375	0.99403
	Alistipes	9837.4	-0.388206	0.922786	-0.42069	0.673982	0.987029			Blautia_sp_A-C6-0	5.4309	-0.493649	1.06905	-0.461765	0.64425	0.99403
	Acetivibrio	52.3543	0.815921	0.660977	1.23442	0.217047	0.987029			Luteolibacter_sp_CCTCC_AB_2010415	3.45978	1.96485	1.86678	1.05253	0.292556	0.99403
	Acidaminobacter	0.263546	-1.48974	4.05335	-0.367532	0.713222	0.987029			Clostridiales_bacterium_canine_oral_taxon_336	8.24956	-0.147057	1.07235	-0.137135	0.890924	0.99403
	Alkaliflexus	6.90428	1.45033	1.23567	1.17372	0.240507	0.987029			Candidatus_Symbiothrix_dinenymphae	3.90078	1.41944	1.43409	0.989789	0.322277	0.99403
	Ruegeria	0.310092	0.207902	4.08047	0.0509504	0.959365	0.987029			bacterium_NLAE-zl-G12	24.8095	0.308493	1.03544	0.297934	0.765754	0.99403
	Catenibacterium	1.07316	-1.04342	2.29133	-0.455377	0.648838	0.987029			Leuconostoc_mesenteroides	13.7811	-1.04561	0.825901	-1.26602	0.205505	0.99403
	Deferribacter	0.475594	1.09527	3.29074	0.332834	0.73926	0.987029			Clostridium_sp_A9	34.7562	-0.512164	0.751047	-0.681933	0.495282	0.99403
	Micrococcus	2.06279	0.0631245	1.83127	0.0344704	0.972502	0.987029			bacterium_NLAE-zl-G497	6.51358	1.68363	1.08132	1.55702	0.119466	0.99403
	Desulfonispora	0.461883	-0.623287	3.31953	-0.187764	0.851062	0.987029			Mucispirillum_sp_69	4.13903	0.488962	1.34081	0.364677	0.715353	0.99403
	Halothiobacillus	6.56693	-0.268276	1.02433	-0.261905	0.793395	0.987029			Bacteroides_sp_WH2	2.81762	-1.66984	1.77709	-0.939647	0.347399	0.99403
	Marivirga	4.18393	2.4681	1.69769	1.4538	0.146001	0.987029			Bacteroides_dorei	4.94032	-1.68633	1.5245	-1.10615	0.268661	0.99403
	Calditerrivibrio	0.483604	1.12318	3.69481	0.303989	0.761136	0.987029			Exiguobacterium_sp_AT1b	7.50487	-0.606899	0.908871	-0.66775	0.504293	0.99403
	Riemerella	10.8991	0.679158	1.19004	0.570703	0.568201	0.987029			Pseudobutyrivibrio_sp_4C55C	3.69954	-0.637941	1.18133	-0.540019	0.589184	0.99403
	Desulfatibacillum	0.45201	-2.24001	3.26917	-0.685193	0.493222	0.987029			Blautia_coccoides	29.3162	-0.313626	0.659774	-0.475354	0.634535	0.99403
	Herbaspirillum	11.2519	-1.35684	1.24626	-1.08873	0.276273	0.987029			bacterium_NLAE-zl-G231	5.86604	0.257703	1.03745	0.248401	0.803824	0.99403
	Alcaligenes	1.34531	-0.638595	2.00884	-0.317892	0.750567	0.987029			Lysinibacillus_sphaericus	7.42516	-1.47724	1.09235	-1.35236	0.176262	0.99403
	Limnohabitans	0.303583	-1.66611	4.03678	-0.412732	0.679803	0.987029			butyrate-producing_bacterium_M62/1	20.0332	0.242012	0.70608	0.342754	0.731784	0.99403
	Phenylobacterium	0.475594	1.09527	3.29074	0.332834	0.73926	0.987029			Enterococcus_sp_AS321005	13.1043	-0.426386	0.947982	-0.449783	0.652867	0.99403
	Dermacoccus	0.534957	2.68919	3.9923	0.673593	0.50057	0.987029			bacterium_NLAE-zl-P601	3.71293	0.349419	1.24797	0.279991	0.779484	0.99403
	Mesoplasma	3.55641	1.68153	1.41279	1.19022	0.233961	0.987029			bacterium_NLAE-zl-P606	5.21502	0.622473	1.10761	0.561995	0.574119	0.99403
	Laribacter	1.71003	3.25991	2.24629	1.45125	0.146712	0.987029			mixed_culture_ruminal_bacterium_PAD193	15.7995	0.754256	1.29032	0.584548	0.558852	0.99403
	Turneriella	0.631222	0.159424	3.01386	0.0528968	0.957814	0.987029			Clostridium_sp_SY8519	1654.85	0.122679	0.501039	0.24485	0.806573	0.99403
	Pseudochrobactrum	0.331003	2.00909	4.04294	0.496936	0.619234	0.987029			bacterium_NLAE-zl-P608	4.381	-0.362824	1.16432	-0.311619	0.75533	0.99403
	Mitsuokella	72.9311	0.176633	0.601686	0.293563	0.769092	0.987029			bacterium_NLAE-zl-P609	3.90275	0.915407	1.18732	0.770988	0.440714	0.99403
	Pelobacter	2.08188	-2.33992	1.79456	-1.3039	0.192269	0.987029			bacterium_NLAE-zl-H403	3.62763	-0.232105	1.38773	-0.167256	0.867169	0.99403
	Porphyromonas	501.283	1.1154	0.910262	1.22536	0.220438	0.987029			Bacteroides_massiliensis	32.9367	-1.97423	1.18178	-1.67056	0.0948088	0.99403
	Selenomonas	113.76	0.0248598	0.638532	0.0389327	0.968944	0.987029			Bacteroides_galacturonicus	14.3305	-0.529298	0.77277	-0.684936	0.493384	0.99403
	Gluconobacter	0.520277	1.123	3.6042	0.311581	0.755359	0.987029			Capnocytophaga_canimorsus	7.82422	0.219443	1.12292	0.195422	0.845063	0.99403
	Gardnerella	2.6676	-1.02947	1.69385	-0.607767	0.543342	0.987029			Clostridiales_bacterium_DJF_B152	10.531	-1.78349	1.00012	-1.78328	0.0745401	0.99403
	Mogibacterium	1.68951	-3.01955	2.03647	-1.48274	0.138143	0.987029			Porphyromonas_sp_9Pre_(55a)	24.3492	0.940978	1.04544	0.90008	0.368078	0.99403
	Flexibacter	5.82889	-0.349806	1.44322	-0.242379	0.808486	0.987029			Gemmiger_formicilis	7.51082	-0.42695	1.09677	-0.389279	0.697069	0.99403
	Propionibacterium	2.86217	-3.85685	2.03033	-1.89962	0.0574828	0.987029			bacterium_NLAE-zl-C126	2.75825	1.12695	1.55874	0.722985	0.469689	0.99403
	Tissierella	1.30692	0.983923	1.9706	0.4993	0.617568	0.987029			bacterium_NLAE-zl-C122	8.15119	0.957833	0.936144	1.02317	0.306228	0.99403
	Sulfobacillus	0.327707	0.207902	4.08047	0.0509504	0.959365	0.987029			Oribacterium_sp_ICM51	3.37408	-0.237092	1.28255	-0.184859	0.853339	0.99403
	Lachnospira	63.6486	1.00215	0.682409	1.46855	0.141956	0.987029			bacterium_NLAE-zl-C120	3.47047	0.408424	1.20779	0.338159	0.735243	0.99403
	Uliginosibacterium	0.683657	-1.41999	3.30682	-0.429411	0.667624	0.987029			rumen_bacterium_NK3A76	7.64371	0.220597	0.960895	0.229575	0.818422	0.99403
	Erwinia	0.950567	-2.04449	2.37244	-0.861766	0.388817	0.987029			rumen_bacterium_NK3A75	5.92798	-0.639595	1.1542	-0.554146	0.579479	0.99403
	Beijerinckia	0.874818	-1.92286	2.67212	-0.719602	0.47177	0.987029			rumen_bacterium_NK3A74	5.15231	0.940228	1.04839	0.896833	0.369808	0.99403
	Gracilibacter	1.67487	2.25536	1.86089	1.21198	0.22552	0.987029			Helicobacter_hepaticus	640.661	0.98903	1.23833	0.798679	0.424476	0.99403
	Deinococcus	0.789591	-0.318127	2.52906	-0.125788	0.8999	0.987029			Veillonella_atypica	5.62653	0.50788	1.06327	0.477657	0.632895	0.99403
	Acetanaerobacterium	5.38308	0.399696	1.16797	0.342215	0.732189	0.987029			Lachnospiraceae_bacterium_DJF_VR44	30.976	0.366345	0.71858	0.509818	0.610179	0.99403
	Halobacillus	2.25865	0.665442	1.46032	0.455682	0.648618	0.987029			Eubacterium_xylanophilum	11.9782	0.442826	1.05593	0.419372	0.674945	0.99403
	Olsenella	2.60508	-3.69556	2.09163	-1.76684	0.0772557	0.987029			Staphylococcus_aureus	75.4644	-0.366934	0.594266	-0.617457	0.536933	0.99403
	Caldanaerocella	1.1278	0.572622	2.49779	0.229252	0.818673	0.987029			Bacteroides_sp_ASF519	5.85955	0.55481	1.61066	0.344461	0.7305	0.99403
	Sphingobium	3.58969	-1.65533	1.50969	-1.09647	0.272872	0.987029			Clostridiaceae_bacterium_DJF_LS40	6.46945	0.707867	1.11254	0.636264	0.524604	0.99403
	Ammonifex	0.498556	-0.764257	3.24718	-0.235361	0.813929	0.987029			Clostridiales_bacterium_24-4c	257.647	0.315997	0.765968	0.412546	0.679939	0.99403
	Helcococcus	16.494	1.05011	0.83278	1.26097	0.20732	0.987029			bacterium_NLAE-zl-G74	8.9204	0.79649	1.20469	0.661156	0.508513	0.99403
	Sphaerochaeta	1.22584	-0.505691	2.15698	-0.234444	0.81464	0.987029			Bacteroides_sp_MANG	9.15987	-0.414867	0.97892	-0.423801	0.671711	0.99403
	Magnetococcus	6.21428	0.502158	1.06586	0.471128	0.63755	0.987029			butyrate-producing_bacterium_L1-810	6.96106	-0.869926	1.02135	-0.85174	0.394358	0.99403
	Peptostreptococcus	7.11921	-0.652747	1.13785	-0.573669	0.566192	0.987029			Robinsoniella_peoriensis	467.721	0.428352	0.686957	0.62355	0.532923	0.99403
	Ruminobacillus	0.534957	2.68919	3.9923	0.673593	0.50057	0.987029			Herbaspirillum_seropedicae	6.44568	-1.84564	1.42402	-1.29608	0.194948	0.99403
	Symbiobacterium	5.34764	0.0737297	1.06101	0.0694903	0.944599	0.987029			Oscillospira_sp_E	3.01815	2.17181	1.62724	1.33466	0.181986	0.99403
	Chromobacterium	1.16247	-3.59241	2.77783	-1.29325	0.195926	0.987029			Oscillospira_sp_G	3.19923	-0.6767	1.46006	-0.463475	0.643024	0.99403
	Euhalothece	0.439462	-0.531339	3.81178	-0.139394	0.889139	0.987029			Oscillospira_sp_F	10.2568	1.69467	1.03044	1.64461	0.100051	0.99403
	Emticicia	8.60754	-0.317278	1.00618	-0.315328	0.752513	0.987029			Oscillospira_sp_C	12.5477	0.47963	1.09647	0.43743	0.6618	0.99403
	Kineococcus	0.415338	-2.13179	3.81794	-0.558362	0.576597	0.987029			bacterium_NLAE-zl-C354	19.3779	0.310095	0.802626	0.38635	0.699238	0.99403
	Petrobacter	0.502393	-0.8311	3.65397	-0.227451	0.820073	0.987029			Butyrivibrio_sp_4C59C	4.17288	1.79962	1.24762	1.44245	0.149177	0.99403
	Leptothrix	0.488683	-2.34183	3.61816	-0.647243	0.517475	0.987029			Streptococcus_pyogenes	1329.12	-0.506967	0.585459	-0.865931	0.386528	0.99403
	Aeribacillus	0.660221	0.227086	3.33531	0.0680854	0.945718	0.987029			Blautia_sp_BM-C2-0	5.45806	0.374256	1.1584	0.32308	0.746635	0.99403
	Campylobacter	918.307	-0.41015	0.606026	-0.676787	0.498541	0.987029			Clostridium_sp_ASF502	9.94043	0.278412	0.886712	0.313982	0.753535	0.99403
	Curtobacterium	0.793428	-0.393713	2.33163	-0.168857	0.865909	0.987029			Lachnospiraceae_bacterium_595	30.3248	-1.39287	0.818234	-1.70229	0.0887016	0.99403
	Thalassobacillus	0.297275	0.207902	4.08047	0.0509504	0.959365	0.987029			Lachnobacterium_sp_wal_14165	2.87874	0.789932	1.40295	0.563051	0.5734	0.99403
	Synechocystis	1.43293	0.604762	2.10343	0.287513	0.77372	0.987029			Bacteroides_faecis	8.82797	-0.361383	1.3142	-0.274984	0.783329	0.99403
	Zobellia	1.69886	-1.15973	2.1249	-0.545778	0.585219	0.987029			Corynebacterium_resistens	13.5935	-0.14035	0.892517	-0.157252	0.875046	0.99403
	Anaerofilum	2.12057	1.43733	1.64293	0.874855	0.381653	0.987029			Alistipes_sp_JC50	15.2123	-1.01899	1.44047	-0.707401	0.479318	0.99403
	Prosthecobacter	6.87827	3.29998	3.3491	0.985332	0.324461	0.987029			butyrate-producing_bacterium_SSC/2	571.431	0.148689	0.583933	0.254634	0.799006	0.99403
	Cyclobacterium	8.74685	0.534444	1.16192	0.459965	0.645541	0.987029			Clostridium_sp_BS-5	10.7088	0.410385	0.819521	0.500762	0.616538	0.99403
	Terriglobus	0.647944	-1.33131	2.96894	-0.448413	0.653855	0.987029			butyrate-producing_bacterium_A2-175	10.1711	-1.03045	0.964572	-1.0683	0.285386	0.99403
	Aerococcus	24.202	0.326153	0.723921	0.450537	0.652323	0.987029			bacterium_CT-m2	20.1582	1.15384	0.727194	1.58671	0.112579	0.99403
	Bartonella	5.63577	0.29824	1.07658	0.277025	0.781761	0.987029			Clostridium_sp_BS-1	9.9976	-1.41952	0.894171	-1.58753	0.112392	0.99403
	Roseburia	16381.3	-0.0598046	0.605429	-0.0987806	0.921312	0.987029			Catonella_sp_canine_oral_taxon_025	5.00529	0.186847	1.21141	0.154239	0.877421	0.99403
	Kineosporia	0.303583	-1.66611	4.03678	-0.412732	0.679803	0.987029			bacterium_NLAE-zl-P629	5.21398	0.947182	1.40246	0.675374	0.499438	0.99403
	Pelotomaculum	4.02746	-0.16231	1.22648	-0.132338	0.894717	0.987029			bacterium_NLAE-zl-P625	3.25516	0.256602	1.30965	0.195932	0.844664	0.99403
	Geobacillus	58.7782	-0.736422	0.702763	-1.0479	0.294687	0.987029			bacterium_NLAE-zl-P620	4.83464	0.979472	1.10488	0.886499	0.375349	0.99403
	Tindallia	1.3024	-0.541337	1.94928	-0.277711	0.781234	0.987029			Anaerophaga_thermohalophila	6.31912	1.35204	1.34296	1.00676	0.31405	0.99403
	Treponema	1642.75	0.044257	0.598104	0.0739954	0.941014	0.987029			bacterium_NLAE-zl-H469	4.52574	-0.253472	1.0984	-0.230765	0.817498	0.99403
	Proteus	1.34757	-3.80806	3.04238	-1.25167	0.210689	0.987029			bacterium_NLAE-zl-P484	21.1714	-0.737999	0.814228	-0.90638	0.364735	0.99403
	Robiginitalea	3.52951	0.236813	1.48442	0.159532	0.873249	0.987029			Gram-negative_bacterium_cTPY-13	13.8917	0.407002	1.15885	0.351212	0.725429	0.99403
	Actinocorallia	0.283565	-1.57992	4.04463	-0.390622	0.696077	0.987029			Clostridium_sp_Culture-1	108.817	-0.21061	0.764841	-0.275365	0.783036	0.99403
	Natronincola	2.00296	-2.22545	1.97596	-1.12626	0.260054	0.987029			Lachnospiraceae_bacterium_4C56CA	3.12744	1.11746	1.29523	0.86275	0.388275	0.99403
	Aeromonas	0.439462	-0.531339	3.81178	-0.139394	0.889139	0.987029			rumen_bacterium_NK4A78	25.9464	-1.4603	1.07398	-1.35971	0.173921	0.99403
	Solitalea	4.4785	-0.883863	1.44777	-0.610501	0.54153	0.987029			rumen_bacterium_NK2C32	4.91054	0.387984	1.06873	0.363032	0.716581	0.99403
	Facklamia	0.73914	-0.234374	2.86046	-0.0819358	0.934698	0.987029			Clostridium_sp_U42	6.19928	-0.147997	0.956453	-0.154735	0.87703	0.99403
	Linmingia	0.344361	0.207902	4.08047	0.0509504	0.959365	0.987029			Desulfotomaculum_sp_MJ1	11.0052	0.361616	0.860636	0.420173	0.674359	0.99403
	Microcystis	0.843811	0.638662	2.73536	0.233484	0.815386	0.987029			Bacteroides_sartorii	19.4766	-1.51195	1.24554	-1.21388	0.224792	0.99403
	Robinsoniella	487.724	0.655334	0.725647	0.903104	0.366471	0.987029			Mucispirillum_schaedleri	6.15284	0.898529	1.21202	0.741351	0.458481	0.99403
	Macrococcus	5.37478	-0.0969938	1.05931	-0.091563	0.927045	0.987029			Leuconostoc_kimchii	4.56393	-0.34929	1.08103	-0.32311	0.746612	0.99403
	Pasteurella	33.5885	-0.74499	0.709142	-1.05055	0.293465	0.987029			bacterium_NLAE-zl-C109	5.88694	-0.499624	1.10515	-0.452089	0.651205	0.99403
	Shewanella	0.488683	-2.34183	3.61816	-0.647243	0.517475	0.987029			bacterium_NLAE-zl-C107	3.44169	-0.349332	1.22032	-0.286262	0.774677	0.99403
	Moryella	49.2718	1.46367	1.00943	1.44999	0.147061	0.987029			Selenomonas_sputigena	15.2494	-0.695904	0.873707	-0.796495	0.425744	0.99403
	Thermovirga	3.95995	-0.355658	1.17932	-0.301579	0.762973	0.987029			Veillonellaceae_bacterium_oral_taxon_131	3.32326	-0.296604	1.27683	-0.232297	0.816307	0.99403
	Clostridium	10526.4	0.0877254	0.55414	0.158309	0.874213	0.987029			Catonella_sp_canine_oral_taxon_257	5.69542	0.982309	1.11039	0.884649	0.376346	0.99403
	Ruminofilibacter	0.685238	3.05228	2.83616	1.0762	0.281837	0.987029			Bilophila_wadsworthia	3.82411	-1.53427	1.72774	-0.88802	0.37453	0.99403
	Saprospira	1.79054	-0.635742	1.63739	-0.388265	0.69782	0.987029			Staphylococcus_delphini	3.16389	-0.675351	1.48724	-0.454097	0.649759	0.99403
	Weeksella	2.60853	0.850713	1.67815	0.506935	0.6122	0.987029			Clostridium_sp_OkiN108	6.38306	0.656992	1.07662	0.610236	0.541706	0.99403
	Planomicrobium	0.503623	1.12308	3.6441	0.308192	0.757936	0.987029			bacterium_ic1340	19.6297	0.438276	0.799765	0.548006	0.583688	0.99403
	Filifactor	8.001	-0.108656	0.961843	-0.112966	0.910057	0.987029			Porphyromonadaceae_bacterium_DJF_B175	5.5698	0.413708	1.35798	0.304648	0.760634	0.99403
	Rikenella	1.65761	1.30108	2.06549	0.629912	0.528752	0.987029			Clostridium_neopropionicum	3.28883	0.263096	1.25013	0.210455	0.833312	0.99403
	Janthinobacterium	2.5219	0.335161	1.48226	0.226115	0.821112	0.987029			Prevotella_buccae	2.98228	2.72699	1.74361	1.56398	0.117821	0.99403
	Anaerotruncus	69.6151	-0.550502	0.839068	-0.656087	0.511768	0.987029			bacterium_NLAE-zl-P547	2.93191	0.802776	1.57057	0.511135	0.609256	0.99403
	Spiroplasma	23.1923	-0.226935	0.898315	-0.252623	0.80056	0.987029			bacterium_NLAE-zl-P541	3.77168	1.62292	1.2369	1.31209	0.189491	0.99403
	Butyrivibrio	668.832	0.489621	0.545735	0.897178	0.369624	0.987029			bacterium_NLAE-zl-P540	4.0471	0.559641	1.25851	0.444686	0.656546	0.99403
	Sulfurihydrogenibium	0.834626	2.0865	2.72	0.767094	0.443026	0.987029			Barnesiella_intestinihominis	71.5799	0.950565	1.03153	0.921511	0.356784	0.99403
	Garciella	0.297275	0.207902	4.08047	0.0509504	0.959365	0.987029			Desulfovibrio_sp_canine_oral_taxon_070	31.9241	-0.474057	0.761663	-0.622397	0.533681	0.99403
	Sporotalea	1.80331	-0.751671	1.76307	-0.426342	0.669859	0.987029			bacterium_NLAE-zl-P22	3.90274	0.701594	1.21875	0.575666	0.564841	0.99403
	Thioalkalivibrio	0.787187	-0.321845	2.78674	-0.115491	0.908056	0.987029			butyrate-producing_bacterium_SM6/1	3.73457	0.60235	1.21352	0.496365	0.619637	0.99403
	Faecalibacterium	3888.51	0.3958	0.556996	0.710598	0.477334	0.987029			bacterium_NLAE-zl-P28	3.80738	-0.367064	1.21915	-0.301081	0.763353	0.99403
	Haloplasma	0.33011	0.207902	4.08047	0.0509504	0.959365	0.987029			Bacteroides_sp_DSM_12148	7.07535	-1.24541	1.67621	-0.742991	0.457487	0.99403
	Phascolarctobacterium	474.177	-0.862412	1.09718	-0.786026	0.431852	0.987029			Desulfovibrio_alaskensis	13.1708	-0.772843	0.793898	-0.97348	0.330315	0.99403
	Cohnella	0.957496	0.248551	2.35567	0.105512	0.915969	0.987029			bacterium_NLAE-zl-G270	9.72743	1.0065	1.06204	0.947702	0.343281	0.99403
	Candidatus Armantifilum	13.8808	0.528647	1.02077	0.517888	0.604536	0.987029			bacterium_NLAE-zl-G276	7.16683	-0.167736	0.97604	-0.171853	0.863553	0.99403
	Polynucleobacter	12.6757	-0.209028	0.7812	-0.267573	0.789028	0.987029			bacterium_NLAE-zl-G277	7.26907	1.34209	1.18449	1.13305	0.257191	0.99403
	Desulfobacula	0.488683	-2.34183	3.61816	-0.647243	0.517475	0.987029			Clostridium_hathewayi	90.91	-0.0777016	0.5492	-0.141481	0.88749	0.99403
	Candidatus Glomeribacter	4.59436	-0.700553	1.27598	-0.549031	0.582984	0.987029			bacterium_NLAE-zl-C599	6.64733	1.0783	1.01905	1.05814	0.289991	0.99403
	Muricauda	3.05813	-1.35336	1.53218	-0.883288	0.377081	0.987029			Lachnospiraceae_bacterium_DJF_VP30	24.5884	0.764214	0.697776	1.09521	0.273423	0.99403
	Dorea	63.5633	-0.483581	0.673334	-0.718189	0.472641	0.987029			rumen_bacterium_R-7	4.5201	0.727974	1.18661	0.613491	0.539552	0.99403
	Actinoplanes	6.08309	0.757778	1.02152	0.741812	0.458201	0.987029			Clostridium_citroniae	27.3714	0.468189	0.706756	0.662449	0.507684	0.99403
	Marinimicrobium	1.69908	4.3634	2.17023	2.01057	0.0443711	0.987029			Clostridium_sp_Iso-A1	8.08442	0.622891	0.941031	0.661924	0.50802	0.99403
	Methylobacterium	5.72673	0.79365	1.2037	0.659345	0.509674	0.987029			Clostridium_sp_Iso-A2	5.39002	1.21182	1.17109	1.03478	0.300772	0.99403
	Dechloromonas	0.505338	-2.38875	3.98609	-0.599272	0.548991	0.987029			Clostridiales_bacterium_canine_oral_taxon_141	5.05111	0.301451	1.18097	0.255258	0.798524	0.99403
	Thermus	3.54933	1.57727	1.63339	0.965639	0.334225	0.987029			Candidatus_Azobacteroides_pseudotrichonymphae	19.0459	-0.702878	1.19411	-0.588623	0.556114	0.99403
	Holdemania	2.34005	0.159604	1.85512	0.0860343	0.931439	0.987029			mixed_culture_ruminal_bacterium_PAD156	15.8982	1.29446	0.807894	1.60227	0.109096	0.99403
	Kozakia	0.496505	2.59142	3.99823	0.648142	0.516893	0.987029			Clostridium_xylanovorans	6.31429	0.566359	1.18019	0.479886	0.631308	0.99403
	Tepidibacter	0.449066	-0.62301	3.34908	-0.186024	0.852426	0.987029			bacterium_NLAE-zl-H440	4.20701	0.560582	1.38317	0.405289	0.685265	0.99403
	Solobacterium	0.482795	1.04907	3.69351	0.28403	0.776387	0.987029			human_intestinal_firmicute_CJ31	20.3057	0.475152	0.869143	0.54669	0.584592	0.99403
	Candidatus Azobacteroides	16.8343	-0.363602	1.12087	-0.324393	0.74564	0.987029			human_intestinal_firmicute_CJ36	13.1289	0.534048	0.862519	0.619172	0.535803	0.99403
	Caloramator	2.44345	-0.0965194	1.78821	-0.0539754	0.956955	0.987029			Fusobacterium_nucleatum	3.54754	-1.90451	2.05036	-0.928867	0.352958	0.99403
	Ornithobacterium	1.00149	-2.13099	2.63856	-0.807631	0.419303	0.987029			Candidatus_Clostridium_massiliensis	3.34628	-0.905564	1.35006	-0.670756	0.502376	0.99403
	Ruminococcus	7515.03	-0.651624	0.558712	-1.1663	0.243495	0.987029			Clostridium_sp_ADS23	3.99978	1.09684	1.177	0.931892	0.351393	0.99403
	Sharpea	0.792887	0.826706	2.52651	0.327213	0.743507	0.987029			Lactobacillus_sp_j0230	2.69517	0.434797	1.65186	0.263217	0.792384	0.99403
	Arcobacter	6.98942	-1.84104	1.23369	-1.4923	0.13562	0.987029			Lactobacillus_sp_j0238	3.28201	0.604331	1.72992	0.349341	0.726833	0.99403
	Kurthia	0.856628	0.676673	2.48001	0.272851	0.784968	0.987029			Helicobacter_mustelae	28.0664	1.16523	1.39656	0.83436	0.404078	0.99403
	Zymophilus	2.25122	-1.80052	1.77499	-1.01438	0.3104	0.987029			Bacteroides_xylanisolvens	3538	-0.629806	1.09869	-0.573232	0.566487	0.99403
	Kocuria	1.46546	-0.248077	2.33411	-0.106283	0.915358	0.987029			bacterium_NLAE-zl-G503	10.5462	1.65152	0.917123	1.80076	0.0717401	0.99403
	Paenibacillus	251.695	0.0302108	0.525098	0.0575336	0.95412	0.987029			Lactobacillus_rogosae	38.0314	1.16715	0.70948	1.64507	0.0999548	0.99403
	Ketogulonicigenium	0.465721	-0.686986	3.31333	-0.20734	0.835744	0.987029			bacterium_NLAE-zl-H292	3.2658	-1.02147	1.41784	-0.720444	0.471252	0.99403
	Hydrogenophilus	0.336892	-1.79748	4.02564	-0.446508	0.65523	0.987029			Anaerostipes_caccae	36.0052	0.556484	1.04026	0.534947	0.592687	0.99403
	Pseudobutyrivibrio	56.7323	-0.0227288	0.694373	-0.0327329	0.973888	0.987029			Prevotella_melaninogenica	28.2976	-0.335659	1.08054	-0.31064	0.756074	0.99403
	Francisella	1.13567	-2.34795	2.30965	-1.01658	0.309351	0.987029			Clostridiales_bacterium_KM2	4.88309	-0.283788	1.11592	-0.254309	0.799257	0.99403
	Xenorhabdus	0.677768	1.66524	2.92253	0.569792	0.568818	0.987029			Streptococcus_mitis	11.963	0.302907	0.822741	0.368168	0.712748	0.99403
	Anaerobranca	0.45948	-0.623235	3.32498	-0.187441	0.851315	0.987029			Lachnospiraceae_bacterium_oral_taxon_G33	3.12661	-1.60657	1.50946	-1.06434	0.287177	0.99403
	Acetohalobium	0.502393	-0.8311	3.65397	-0.227451	0.820073	0.987029			Firmicutes_sp_oral_strain_FTB41	3.91909	-0.717231	1.21722	-0.589236	0.555703	0.99403
	Anaerococcus	4.54329	0.403965	1.09807	0.367887	0.712957	0.987029			Desulfosporosinus_acidiphilus	11.9845	-0.180863	0.841436	-0.214946	0.82981	0.99403
	Prevotella	990.508	1.10862	0.923355	1.20064	0.229891	0.987029			Clostridium_sp_MLG080-1	5.45301	-0.660592	1.02649	-0.643543	0.519872	0.99403
	Paraprevotella	4.54301	0.4504	1.31232	0.34321	0.73144	0.987029			Eubacterium_desmolans	13.44	0.485352	0.794156	0.611155	0.541097	0.99403
	Gordonibacter	7.38147	0.0999773	0.923359	0.108276	0.913777	0.987029			Lachnospiraceae_bacterium_canine_oral_taxon_346	3.38715	-0.736192	1.26502	-0.581961	0.560593	0.99403
	Veillonella	124.814	-0.450899	0.849862	-0.530556	0.595727	0.987029			Lactobacillus_sp_BL304	4.42734	0.408049	1.76952	0.230598	0.817627	0.99403
	Phocaeicola	0.810502	0.750075	2.76369	0.271404	0.78608	0.987029			Lactobacillus_sp_BL302	4.5234	0.273356	1.68929	0.161817	0.87145	0.99403
	Acetobacter	2.13312	0.882285	1.48694	0.593355	0.552944	0.987029			Lactobacillus_sp_BL301	3.53966	0.520986	1.77413	0.293657	0.76902	0.99403
	Legionella	1.0794	-1.09805	2.09626	-0.523816	0.600407	0.987029			butyrate-producing_bacterium_SR1/5	6.8945	-1.02896	1.01731	-1.01145	0.311802	0.99403
	Heliobacillus	0.449066	-0.62301	3.34908	-0.186024	0.852426	0.987029			butyrate-producing_bacterium_SR1/1	7.5584	0.864227	0.98345	0.878771	0.379526	0.99403
	Streptobacillus	0.431992	-2.18143	3.76766	-0.578988	0.562597	0.987029			Bacteroides_thetaiotaomicron	17760.5	-1.60654	1.02262	-1.57099	0.116184	0.99403
	Mycoplasma	19.4151	0.406662	0.952558	0.426916	0.66944	0.987029			Pseudomonas_fluorescens	5.91423	-0.638036	1.30422	-0.48921	0.624693	0.99403
	Verminephrobacter	0.69353	0.104488	3.28776	0.0317807	0.974647	0.987029			Butyrivibrio_sp_4C58CA	3.37754	2.09876	1.3779	1.52315	0.127721	0.99403
	Oenococcus	3.43474	-0.85898	1.46648	-0.585745	0.558047	0.987029			bacterium_NLAE-zl-G258	10.5727	0.97264	0.947819	1.02619	0.304804	0.99403
	Pyramidobacter	0.96044	-0.770917	2.3709	-0.325158	0.745062	0.987029			Pediococcus_claussenii	20.5038	-0.632069	0.845361	-0.747691	0.454647	0.99403
	Novosphingobium	0.571235	-1.11131	3.48346	-0.319025	0.749708	0.987029			Streptococcus_parasanguinis	18.921	-0.938682	0.816986	-1.14896	0.250574	0.99403
	Microvirgula	1.03789	0.101321	2.57649	0.0393252	0.968631	0.987029			bacterium_NLAE-zl-C570	8.90312	0.995496	1.15269	0.863628	0.387792	0.99403
	Ensifer	0.341417	2.04768	4.03941	0.506926	0.612207	0.987029			bacterium_NLAE-zl-C573	2.89545	0.925945	1.40819	0.657545	0.510831	0.99403
	Finegoldia	1.67285	-3.00601	2.09193	-1.43695	0.150731	0.987029			bacterium_NLAE-zl-C572	4.94742	0.765488	1.24356	0.615562	0.538184	0.99403
	Staphylococcus	143.3	-0.365275	0.580259	-0.629503	0.52902	0.987029			Clostridium_aminophilum	33.6506	0.251747	0.816925	0.308164	0.757957	0.99403
	Bifidobacterium	4778.94	-1.00433	0.680095	-1.47675	0.139741	0.987029			Alistipes_sp_JC136	10.3111	-1.25641	1.42321	-0.882799	0.377345	0.99403
	Pullulanibacillus	0.327707	0.207902	4.08047	0.0509504	0.959365	0.987029			Alicyclobacillus_acidiphilus	7.09199	1.14317	1.1457	0.997796	0.318378	0.99403
	Dehalobacterium	1.06444	-0.107647	2.27448	-0.0473281	0.962252	0.987029			Bacteroides_nordii	24.3655	-1.59794	1.48668	-1.07484	0.282448	0.99403
	Haloferula	1.94683	3.46017	2.23484	1.54828	0.121554	0.987029			bacterium_NLAE-zl-H315	4.00052	-0.575065	1.16096	-0.495334	0.620364	0.99403
	Thiovirga	0.310092	0.207902	4.08047	0.0509504	0.959365	0.987029			swine_fecal_bacterium_SD-Pec2	22.815	0.582654	0.80961	0.719672	0.471727	0.99403
	Fastidiosipila	0.947623	-0.805329	2.2001	-0.366042	0.714333	0.987029			Prevotella_sp_oral_taxon_302	2.98878	0.827783	1.74981	0.47307	0.636163	0.99403
	Pseudomonas	13.3317	-1.15702	0.884605	-1.30794	0.190892	0.987029			Desulfovibrio_salexigens	3.56336	-0.296907	1.21272	-0.244827	0.80659	0.99403
	Proteocatella	1.82538	-2.07458	1.79803	-1.15381	0.248579	0.987029			Clostridium_populeti	36.2023	0.452063	0.76468	0.591179	0.5544	0.99403
	Candidatus Methylomirabilis	0.842377	0.733041	2.49005	0.294388	0.768461	0.987029			Desulfovibrio_magneticus	3.57352	-2.10368	1.47696	-1.42433	0.154351	0.99403
	Azospirillum	3.91339	0.963029	1.22174	0.788244	0.430554	0.987029			Thermovirga_lienii	4.19927	-0.549895	1.17073	-0.469704	0.638567	0.99403
	Taylorella	5.79692	-2.21253	1.4892	-1.48571	0.137356	0.987029			bacterium_08_96_4	3.94431	-0.760623	1.15504	-0.658528	0.510199	0.99403
	Howardella	1.48819	0.547382	1.87077	0.292597	0.76983	0.987029			Bacillus_licheniformis	9.92297	-0.413196	0.832983	-0.496044	0.619864	0.99403
	Candidatus Arthromitus	23.698	0.328306	0.720662	0.455562	0.648705	0.987029			Lachnospiraceae_bacterium_oral_taxon_082	3.34924	0.825128	1.32002	0.625087	0.531914	0.99403
	Lactonifactor	3.53891	-0.309271	1.25138	-0.247145	0.804796	0.987029			Lachnospiraceae_bacterium_oral_taxon_083	29.0951	0.93182	1.03962	0.896308	0.370088	0.99403
	Helicobacter	1131.09	1.36657	1.19438	1.14416	0.252556	0.987029			Lachnospiraceae_bacterium_605	35.5452	0.555455	0.719457	0.772048	0.440086	0.99403
	Thermotalea	0.995871	1.21598	2.17536	0.558976	0.576178	0.987029			Lachnospiraceae_bacterium_607	31.8188	0.680084	0.73097	0.930385	0.352172	0.99403
	Acetobacterium	7.22248	0.594095	0.936458	0.634407	0.525815	0.987029			Clostridium_sp_HAAP-2	3.88301	0.467179	1.17391	0.397967	0.690654	0.99403
	Planktothrix	1.31426	-3.77076	2.63896	-1.42888	0.153039	0.987029			bacterium_Irt-JG1-53	3.00139	-0.501264	1.37384	-0.364863	0.715213	0.99403
	Tepidimicrobium	0.331003	2.00909	4.04294	0.496936	0.619234	0.987029			Bacteroides_cellulosilyticus	10.6454	-1.37574	1.57247	-0.874892	0.381633	0.99403
	Desulfitispora	0.320237	-1.7329	4.03099	-0.429894	0.667273	0.987029			Desulfovibrio_sp_G11	4.39063	-0.675407	1.12942	-0.598013	0.549831	0.99403
	Dysgonomonas	9.87521	0.967777	1.07206	0.902725	0.366672	0.987029			bacterium_NLAE-zl-H33	15.7907	-1.83199	1.4158	-1.29396	0.19568	0.99403
	Serratia	0.310092	0.207902	4.08047	0.0509504	0.959365	0.987029			bacterium_NLAE-zl-H31	7.68931	-0.461951	0.895431	-0.515898	0.605925	0.99403
	Anaerospora	0.873971	3.39915	2.60683	1.30394	0.192255	0.987029			Bacillus_megaterium	16.3311	-0.261092	0.78226	-0.333766	0.738556	0.99403
	Desulfitobacterium	66.1703	0.136048	0.573316	0.2373	0.812424	0.987029			Bacteroides_fragilis	311542	-1.7426	1.18077	-1.47582	0.139992	0.99403
	Lautropia	0.81543	-1.76126	2.77815	-0.633969	0.526101	0.987029			rumen_bacterium_NK4B65	9.76598	0.721792	0.987024	0.731281	0.464608	0.99403
	Haemophilus	50.7444	-0.436509	0.654803	-0.666626	0.505011	0.987029			bacterium_NLAE-zl-C147	3.82378	-0.417397	1.22928	-0.339545	0.734199	0.99403
	Vibrio	4.71687	-1.04363	1.31143	-0.795791	0.426154	0.987029			Lactobacillus_sp_oral_taxon_461	4.31362	0.253605	1.55659	0.162924	0.870579	0.99403
	Xylanibacter	0.300219	-1.64967	4.03824	-0.408513	0.682897	0.987029			Azospirillum_lipoferum	2.71629	0.303419	1.35878	0.223302	0.8233	0.99403
	Aequorivita	5.30294	-0.274014	1.10181	-0.248694	0.803598	0.987029			Eggerthella_lenta	9.10099	0.147609	0.857057	0.172228	0.863258	0.99403
	Lawsonia	536.166	0.813982	0.73636	1.10541	0.268981	0.987029			Clostridium_sp_YIT_12070	14.0174	0.270348	0.827585	0.326671	0.743917	0.99403
	Desulfococcus	1.3659	-2.67504	2.10834	-1.26879	0.204517	0.987029			Catonella_sp_canine_oral_taxon_160	4.9825	0.957891	1.2143	0.78884	0.430205	0.99403
	Carnobacterium	8.55019	-0.297236	0.920992	-0.322735	0.746896	0.987029			Lachnospiraceae_bacterium_597	29.7328	-0.980704	0.802485	-1.22208	0.221676	0.99403
	Candidatus Sulcia	0.934805	-0.842237	2.38714	-0.352823	0.724221	0.987029			bacterium_NLAE-zl-P766	6.15901	0.992674	1.00153	0.991156	0.32161	0.99403
	Alkaliphilus	31.0267	0.0635994	0.721642	0.0881316	0.929772	0.987029			bacterium_NLAE-zl-P763	5.26772	0.477289	1.05629	0.451855	0.651373	0.99403
	Pelosinus	6.41364	-1.29275	1.18096	-1.09466	0.273665	0.987029			bacterium_NLAE-zl-P762	3.9916	0.85713	1.17046	0.732302	0.463984	0.99403
	Bacillus	415.381	0.128335	0.54194	0.236806	0.812807	0.987029			Marinilabilia_sp_AK2	2.94937	2.94312	1.681	1.75081	0.079978	0.99403
	Anaplasma	51.1846	0.223338	0.792781	0.281715	0.778162	0.987029			Bacteroides_fluxus	4.46193	0.788049	1.30723	0.602841	0.546615	0.99403
	Prolixibacter	1.95372	0.071569	2.14325	0.0333928	0.973361	0.987029			Clostridium_sp_PI-S10-A1B	10.1285	0.297002	0.832863	0.356604	0.721388	0.99403
	Kyrpidia	0.951728	0.252422	2.1756	0.116024	0.907633	0.987029			Clostridium_sp_U201	5.46807	0.891907	1.04466	0.853776	0.393229	0.99403
	Xanthomonas	1.12683	0.59192	2.0773	0.284946	0.775685	0.987029			Blautia_sp_canine_oral_taxon_143	21.3143	0.229051	0.688237	0.332809	0.739279	0.99403
	Desulfosporosinus	40.1979	0.181945	0.721844	0.252056	0.800998	0.987029			bacterium_NLAE-zl-P506	4.18174	1.17481	1.32701	0.885303	0.375993	0.99403
	Kitasatospora	0.45948	-0.623235	3.32498	-0.187441	0.851315	0.987029			bacterium_NLAE-zl-P605	4.46846	0.409882	1.21778	0.336582	0.736432	0.99403
	Cronobacter	0.907385	-3.24577	2.61583	-1.24082	0.214674	0.987029			Clostridium_sp_strain_S6	2.94139	0.98929	1.28838	0.767854	0.442574	0.99403
	Pantoea	4.72839	0.279492	1.09248	0.255833	0.79808	0.987029			Clostridium_sp_Culture_Jar-13	24.3811	-0.788618	0.710085	-1.1106	0.266742	0.99403
	Moorea	0.472029	-2.29729	3.65903	-0.62784	0.530109	0.987029			Borrelia_duttonii	10.859	-2.05883	1.29093	-1.59485	0.110747	0.99403
	Arthrobacter	2.63642	-0.195617	1.70865	-0.114486	0.908853	0.987029			Alistipes_sp_RMA_9912	7.34708	-0.897843	1.61366	-0.5564	0.577937	0.99403
	Blattabacterium	1.8314	0.320253	2.0025	0.159926	0.872939	0.987029			Lactobacillus_sakei	23.9104	-1.08029	0.726287	-1.48742	0.136904	0.99403
	Propionivibrio	0.505338	-2.38875	3.98609	-0.599272	0.548991	0.987029			bacterium_SH5-3	7.58672	2.74925	1.66705	1.64917	0.0991133	0.99403
	Azotobacter	0.505338	-2.38875	3.98609	-0.599272	0.548991	0.987029			Firmicutes_bacterium_VNs39	2.84759	0.459235	1.37295	0.334487	0.738012	0.99403
	Fusibacter	1.81768	1.60421	1.81273	0.884966	0.376175	0.987029			Megasphaera_micronuciformis	13.8889	-1.52435	1.09515	-1.39191	0.163948	0.99403
	Nocardia	1.25558	0.334805	2.14148	0.156343	0.875763	0.987029			bacterium_mpn-isolate_group_20	5.07082	0.889701	1.21803	0.730441	0.465121	0.99403
	Bradyrhizobium	1.87369	0.321272	2.16528	0.148374	0.882048	0.987029			bacterium_mpn-isolate_group_21	3.527	0.323927	1.22897	0.263575	0.792108	0.99403
	Sporolactobacillus	1.36083	-0.676428	2.0981	-0.3224	0.747149	0.987029			bacterium_mpn-isolate_group_22	10.7453	-0.284253	0.900691	-0.315594	0.75231	0.99403
	Burkholderia	68.5208	0.918865	0.789897	1.16327	0.24472	0.987029			bacterium_mpn-isolate_group_24	4.76666	0.338323	1.12563	0.300564	0.763747	0.99403
	Synergistes	0.685238	3.05228	2.83616	1.0762	0.281837	0.987029			bacterium_mpn-isolate_group_25	7.73798	-1.57963	0.990979	-1.59401	0.110934	0.99403
	Sulfurimonas	0.333948	0.207902	4.08047	0.0509504	0.959365	0.987029			bacterium_HN0711	3.9977	0.463458	1.76406	0.262722	0.792765	0.99403
	Methylocaldum	1.50629	-1.73361	2.19197	-0.79089	0.429008	0.987029			bacterium_NLAE-zl-C556	9.43605	1.27441	1.02447	1.24397	0.213511	0.99403
	Basfia	0.485739	-0.764577	3.27348	-0.233567	0.815321	0.987029			bacterium_NLAE-zl-C555	3.91915	0.823856	1.25726	0.65528	0.512287	0.99403
	Desulforegula	0.505338	-2.38875	3.98609	-0.599272	0.548991	0.987029			bacterium_NLAE-zl-C554	4.96071	0.561245	1.27673	0.439597	0.660229	0.99403
	Anaerophaga	12.2198	1.46886	1.09189	1.34524	0.178546	0.987029			bacterium_NLAE-zl-C553	4.26003	-0.178104	1.299	-0.137109	0.890945	0.99403
	Macellibacteroides	2.67138	0.445955	1.60522	0.277815	0.781154	0.987029			bacterium_NLAE-zl-C551	3.03982	0.482302	1.40126	0.344192	0.730702	0.99403
	Gallibacterium	0.698902	-2.88035	3.15433	-0.913141	0.361168	0.987029			bacterium_NLAE-zl-C550	3.51773	-0.827327	1.25913	-0.657061	0.511142	0.99403
	Pigmentiphaga	0.690585	1.69471	2.90867	0.582643	0.560134	0.987029			bacterium_NLAE-zl-C559	8.25723	1.47425	1.02795	1.43415	0.151528	0.99403
	Wolinella	6.21837	-0.894062	1.41597	-0.631415	0.527769	0.987029			Oscillospira_guilliermondii	133.088	1.17065	0.84675	1.38252	0.166812	0.99403
	Rhodopseudomonas	8.42177	-1.6331	1.06417	-1.53462	0.124877	0.987029			Anaerosporobacter_mobilis	19.7249	0.8455	0.907974	0.931194	0.351753	0.99403
	Sphingobacterium	3.38814	0.388814	1.47307	0.263948	0.79182	0.987029			Bacteroides_sp_CIP103040	4.24403	-0.837624	1.63862	-0.511176	0.609228	0.99403
	Roseibacillus	0.354234	2.09408	4.03528	0.518943	0.603801	0.987029			Clostridium_indolis	29.7468	-0.160283	0.72494	-0.221098	0.825016	0.99403
	Elizabethkingia	3.12539	1.2609	1.55854	0.809026	0.4185	0.987029			Helicobacter_magdeburgensis	6.99276	2.05217	1.75109	1.17194	0.241221	0.99403
	Tannerella	689.42	1.32155	0.920357	1.43591	0.151027	0.987029			Bacteroides_pyogenes	4.11475	2.44458	1.37985	1.77163	0.0764554	0.99403
	Rhodospirillum	0.830675	-3.13043	2.98199	-1.04978	0.293819	0.987029			[Eubacterium]_tenue	6.16238	-1.92819	1.4754	-1.30689	0.19125	0.99403
	Microbacterium	1.52606	-1.00223	1.84382	-0.543563	0.586742	0.987029			butyrate-producing_bacterium_L1-952	6.43582	-0.534175	1.16969	-0.456681	0.6479	0.99403
	Propionispora	1.37433	-1.55132	2.35824	-0.657827	0.51065	0.987029			Alicyclobacillus_cycloheptanicus	15.8124	-0.379208	1.0041	-0.377659	0.705684	0.99403
	Lacinutrix	2.16693	1.83112	1.79299	1.02126	0.307129	0.987029			bacterium_NLAE-zl-H306	2.74851	-0.414528	1.38216	-0.299914	0.764243	0.99403
	Brevibacterium	3.52639	-0.343814	1.35733	-0.253301	0.800036	0.987029			bacterium_NLAE-zl-H300	3.38203	-1.00007	1.23192	-0.811794	0.41691	0.99403
	Carboxydothermus	4.86145	-0.696474	1.30777	-0.532566	0.594334	0.987029			bacterium_NLAE-zl-H10	4.01391	0.334785	1.20798	0.277143	0.78167	0.99403
	Corynebacterium	62.219	0.689733	0.719736	0.958314	0.337905	0.987029			bacterium_NLAE-zl-H11	2.8706	0.333768	1.40377	0.237765	0.812063	0.99403
	Nocardioides	0.317293	0.207902	4.08047	0.0509504	0.959365	0.987029			bacterium_NLAE-zl-H12	2.71275	0.643395	1.45643	0.441761	0.658662	0.99403
	Desulfurobacterium	0.688182	1.68922	2.64473	0.638713	0.52301	0.987029			bacterium_NLAE-zl-H13	13.9681	-1.98512	1.41899	-1.39896	0.161824	0.99403
	Trueperella	722.514	0.420228	0.561445	0.748476	0.454173	0.987029			bacterium_NLAE-zl-H19	7.97691	-0.242316	0.901023	-0.268934	0.787981	0.99403
	Methylomonas	0.506026	1.12987	3.22942	0.349866	0.726439	0.987029			Geobacillus_thermodenitrificans	5.97499	-1.38807	1.03307	-1.34364	0.179066	0.99403
	Anaerosporobacter	21.234	1.036	0.941825	1.09999	0.271337	0.987029			Ruminococcus_lactaris	7.28568	0.782656	0.997726	0.78444	0.432782	0.99403
	Scardovia	0.297275	0.207902	4.08047	0.0509504	0.959365	0.987029			Eubacterium_saburreum	40.455	0.20808	0.747662	0.278307	0.780776	0.99403
	Mobiluncus	130.751	-0.387612	0.626895	-0.618305	0.536374	0.987029			Ruminococcus_sp_WAL_17306	13.7085	-1.01849	0.925304	-1.1007	0.271026	0.99403
	Acidovorax	0.346765	0.207902	4.08047	0.0509504	0.959365	0.987029			Ruminococcus_faecis	21.7561	-0.339377	0.788409	-0.430457	0.666863	0.99403
	Acetitomaculum	10.0822	0.736721	0.892618	0.825349	0.409174	0.987029			Helicobacter_ganmani	219.982	1.7172	1.42846	1.20214	0.22931	0.99403
	Desulfovibrio	894.198	-0.420125	0.52522	-0.799904	0.423767	0.987029			Clostridiales_bacterium_21-4c	15.2253	-0.223281	0.918389	-0.243123	0.80791	0.99403
	Neisseria	14.7476	-1.54138	0.849072	-1.81537	0.0694672	0.987029			bacterium_NLAE-zl-P746	4.47508	-0.311669	1.09537	-0.284533	0.776002	0.99403
	Hydrocarboniphaga	0.303583	-1.66611	4.03678	-0.412732	0.679803	0.987029			bacterium_NLAE-zl-P743	3.0843	-0.904252	2.09613	-0.431391	0.666184	0.99403
	Jeotgalibacillus	0.341417	2.04768	4.03941	0.506926	0.612207	0.987029			bacterium_NLAE-zl-H542	4.23707	-1.11196	1.34171	-0.828762	0.407239	0.99403
	Citrobacter	0.718921	-2.91725	3.13004	-0.932018	0.351327	0.987029			Enterococcus_gallinarum	3.42895	-0.341506	1.21915	-0.280119	0.779386	0.99403
	Prochlorococcus	2.94582	0.156265	1.5133	0.103261	0.917756	0.987029			Clostridium_sp_K7	4.85939	1.06319	1.22016	0.87135	0.383563	0.99403
	Rhodobacter	1.11991	-1.21509	2.27936	-0.533086	0.593974	0.987029			Clostridium_sp_K5	4.63052	0.165084	1.14877	0.143705	0.885733	0.99403
	Planifilum	0.816118	0.876184	2.51079	0.348968	0.727114	0.987029			Clostridium_ljungdahlii	4.82976	1.37662	1.13766	1.21005	0.22626	0.99403
	Desulfurispirillum	1.82988	-0.128626	1.94578	-0.0661049	0.947294	0.987029			Blautia_stercoris	17.6664	0.176059	0.796262	0.221107	0.825009	0.99403
	Sporomusa	22.1479	-0.103124	0.879984	-0.117188	0.906711	0.987029			bacterium_NLAE-zl-P522	3.41297	0.365497	1.2316	0.296766	0.766645	0.99403
	Lachnobacterium	9.45566	0.792678	0.902236	0.87857	0.379634	0.987029			bacterium_NLAE-zl-P526	3.87042	0.459937	1.19416	0.385154	0.700123	0.99403
	Blautia	7488.61	-0.258684	0.642262	-0.402771	0.687117	0.987029			bacterium_NLAE-zl-P525	3.07814	-0.823028	1.57274	-0.523307	0.600761	0.99403
	Flexistipes	3.68674	0.122827	1.28118	0.0958697	0.923624	0.987029			bacterium_NLAE-zl-P42	3.03131	0.740749	1.38539	0.534685	0.592868	0.99403
	Ilyobacter	1.13368	-1.19314	2.27301	-0.524917	0.599641	0.987029			bacterium_NLAE-zl-P40	2.74532	-0.231064	1.38989	-0.166246	0.867963	0.99403
	Desulfohalobium	6.5727	0.156297	1.2494	0.125098	0.900446	0.987029			Lachnospiraceae_bacterium_ACC2	11.2057	0.579136	1.08896	0.531827	0.594846	0.99403
	Cupriavidus	5.49234	-1.33355	1.20314	-1.10839	0.267692	0.987029			Bacteroides_salanitronis	6854.96	1.31347	1.06344	1.23512	0.216787	0.99403
	Streptomyces	6.33658	-0.06337	1.0142	-0.0624827	0.950178	0.987029			butyrate-producing_bacterium_L2-21	5.10466	-0.281313	1.27108	-0.221318	0.824845	0.99403
	Desulfotomaculum	91.1718	0.44181	0.577985	0.764397	0.444631	0.987029			Lachnospiraceae_bacterium_3F22C	3.48557	-1.74818	1.28165	-1.36401	0.172565	0.99403
	Chelativorans	0.300219	-1.64967	4.03824	-0.408513	0.682897	0.987029			bacterium_NLAE-zl-C135	2.97149	-0.599454	1.4677	-0.40843	0.682958	0.99403
	Oxalophagus	0.310092	0.207902	4.08047	0.0509504	0.959365	0.987029			Prevotella_buccalis	4.82561	-0.335099	1.32033	-0.2538	0.79965	0.99403
	Bacteriovorax	3.17852	1.12443	1.69329	0.664048	0.50666	0.987029			Helicobacter_sp_MIT_07-5167H	9.83032	2.03128	1.59996	1.26958	0.204234	0.99403
	Viridibacillus	0.300219	-1.64967	4.03824	-0.408513	0.682897	0.987029			Taylorella_asinigenitalis	4.6991	-2.52707	1.62319	-1.55685	0.119505	0.99403
	Anaerovibrio	2.92744	0.841912	1.38678	0.6071	0.543785	0.987029			Desulfovibrio_piger	16.0592	-0.552878	0.990089	-0.558412	0.576563	0.99403
	Trigonala	11.5826	-0.043092	0.827948	-0.0520468	0.958491	0.987029			Lachnospiraceae_bacterium_19gly4	41.4474	0.840478	0.727929	1.15462	0.248248	0.99403
	Christensenella	1.11819	0.641169	2.22151	0.288618	0.772874	0.987029			bacterium_NLAE-zl-C530	2.76086	-0.654004	1.47887	-0.442232	0.658322	0.99403
	Oscillibacter	1298.9	1.26568	0.671018	1.88621	0.0592665	0.987029			bacterium_NLAE-zl-C533	3.58034	-0.556678	1.21474	-0.45827	0.646758	0.99403
	Ochrobactrum	1.63487	-0.527205	1.98986	-0.264946	0.791051	0.987029			bacterium_NLAE-zl-C534	4.4769	-0.662254	1.1401	-0.580875	0.561325	0.99403
	Luteolibacter	16.3409	2.50229	1.37942	1.81401	0.0696761	0.987029			bacterium_NLAE-zl-C538	7.0836	0.898997	0.939772	0.956612	0.338763	0.99403
	Aggregatibacter	1.28605	-3.75632	2.60179	-1.44375	0.14881	0.987029			Streptococcus_salivarius	63.593	-0.409745	0.648833	-0.63151	0.527707	0.99403
	Asaia	1.34779	2.87673	2.39518	1.20105	0.229732	0.987029			Clostridium_sp_316002/08	3.72946	0.384355	1.2382	0.310413	0.756247	0.99403
	Mariprofundus	0.346765	0.207902	4.08047	0.0509504	0.959365	0.987029			Thermoanaerobacter_sp_X513	2.71899	1.52589	1.5013	1.01638	0.309448	0.99403
	Clavibacter	0.320237	-1.7329	4.03099	-0.429894	0.667273	0.987029			Thermoanaerobacter_sp_X514	7.69109	0.511534	0.999707	0.511684	0.608872	0.99403
	Centipeda	0.307689	0.207902	4.08047	0.0509504	0.959365	0.987029			Clostridiales_bacterium_L2-14	21.5313	-0.425432	0.838226	-0.507539	0.611777	0.99403
	Dyadobacter	1.2449	-0.525989	1.96206	-0.26808	0.788638	0.987029			rumen_bacterium_NK4A144	11.7195	1.45673	0.837151	1.7401	0.0818413	0.99403
	Megamonas	35.6161	-0.436167	0.954395	-0.457009	0.647665	0.987029			Lactobacillus_taiwanensis	18.4254	0.559669	1.47713	0.378891	0.704769	0.99403
	Gluconacetobacter	3.0517	-1.36996	1.4246	-0.961649	0.336226	0.987029			Roseburia_sp_DJF_RR73	4.66807	-0.464691	1.2727	-0.365123	0.71502	0.99403
	Maricaulis	0.952689	0.238675	2.35816	0.101213	0.919382	0.987029			Candidatus_Phytoplasma_mali	3.05493	-1.80392	1.92371	-0.93773	0.348383	0.99403
	Micromonospora	2.22438	0.713381	1.57864	0.451897	0.651343	0.987029			Lactobacillus_brevis	18.4919	0.787968	0.975211	0.807997	0.419092	0.99403
	Acetomicrobium	0.283565	-1.57992	4.04463	-0.390622	0.696077	0.987029			Clostridium_viride	42.7137	0.549372	0.69344	0.792242	0.42822	0.99403
	Fructobacillus	1.53023	-0.939858	2.24835	-0.418021	0.675932	0.987029			Oribacterium_sp_4F76CC	3.5919	-0.554562	1.37855	-0.402279	0.687479	0.99403
	Catonella	70.8159	0.676675	0.769005	0.879936	0.378894	0.987029			Clostridium_sp_ss1	13.7282	0.664395	0.848744	0.782798	0.433746	0.99403
	Modestobacter	0.671528	1.68923	2.66179	0.634621	0.525675	0.987029			Clostridiaceae_bacterium_LEMV78	4.10487	-0.177158	1.16913	-0.15153	0.879558	0.99403
	Brachyspira	37.8904	-0.630268	0.745308	-0.845647	0.397749	0.987029			Flavobacterium_branchiophilum	5.49454	-1.08888	1.30385	-0.835127	0.403646	0.99403
	Anaerovorax	2.83976	-0.446707	1.44678	-0.308758	0.757505	0.987029			Clostridium_disporicum	14.0531	-1.88982	1.35749	-1.39214	0.163879	0.99403
	Lentzea	0.354234	2.09408	4.03528	0.518943	0.603801	0.987029			butyrate-producing_bacterium_A1-86	3.01157	0.176418	1.25786	0.140252	0.888461	0.99403
	Virgibacillus	0.653912	1.69476	2.95607	0.573316	0.566431	0.987029			Firmicutes_bacterium_oral_taxon_G23	3.33435	0.440996	1.30247	0.338585	0.734923	0.99403
	Pontibacillus	0.624982	0.25126	2.73752	0.0917836	0.92687	0.987029			Staphylococcus_pseudintermedius	7.76364	-0.44783	0.900531	-0.497296	0.61898	0.99403
	Rubrivivax	0.515211	-0.830645	3.62297	-0.229272	0.818658	0.987029			bacterium_NLAE-zl-C378	5.21232	-0.408391	1.06035	-0.385148	0.700128	0.99403
	Comamonas	2.37645	-0.369664	1.42806	-0.258857	0.795745	0.987029			bacterium_NLAE-zl-C273	4.76364	-0.657812	1.0819	-0.608013	0.543179	0.99403
	Thiobacillus	0.822899	-0.397896	2.50705	-0.158711	0.873897	0.987029			bacterium_NLAE-zl-C271	2.82661	1.53754	1.67757	0.916529	0.359389	0.99403
	Oribacterium	133.668	0.579194	0.620056	0.934099	0.350253	0.987029			Lactobacillus_sp_NBRC_14512	3.32355	1.21023	1.77619	0.681363	0.495642	0.99403
	Pasteuria	9.54191	0.177006	0.910145	0.194481	0.845799	0.987029			Desulfotomaculum_acetoxidans	16.8399	0.765975	0.770115	0.994625	0.319919	0.99403
	Collimonas	7.84632	-1.14776	1.22383	-0.937848	0.348323	0.987029			Mesoplasma_florum	3.38303	1.558	1.40925	1.10555	0.26892	0.99403
	Fusobacterium	38.4884	0.562866	0.954856	0.589477	0.555541	0.987029			Sporosarcina_newyorkensis	15.8511	-0.261615	0.898722	-0.291096	0.770978	0.99403
	Methylovorus	0.45201	-2.24001	3.26917	-0.685193	0.493222	0.987029			bacterium_NLAE-zl-P899	3.72559	-2.83646	1.94013	-1.462	0.143741	0.99403
	Dehalococcoides	8.58893	0.0714061	0.9953	0.0717433	0.942806	0.987029			Clostridiaceae_bacterium_bSSV31	4.38638	0.737647	1.39675	0.528118	0.597417	0.99403
	Gramella	0.472029	-2.29729	3.65903	-0.62784	0.530109	0.987029			butyrate-producing_bacterium_M104/1	3.10914	-0.716179	1.73093	-0.413754	0.679055	0.99403
	Swaminathania	0.354234	2.09408	4.03528	0.518943	0.603801	0.987029			Thermoanaerobacterium_xylanolyticum	12.9484	-0.72361	0.764545	-0.946459	0.343914	0.99403
	Leptolyngbya	2.16653	-1.69352	1.64498	-1.02951	0.30324	0.987029			[Ruminococcus]_gnavus	117.009	-0.281129	0.626153	-0.448978	0.653447	0.99403
	Alkalibacterium	10.4171	-1.86324	0.968075	-1.92469	0.0542687	0.987029			Lachnospiraceae_bacterium_oral_taxon_107	10.5656	0.499264	0.966056	0.516807	0.605291	0.99403
	Enterobacter	4.10533	-2.31019	1.36822	-1.68847	0.0913216	0.987029			Streptococcus_pseudopneumoniae	6.71513	-1.0379	1.07758	-0.96318	0.335457	0.99403
	Borrelia	14.4765	-1.42705	1.03166	-1.38325	0.166588	0.987029			Desulfotomaculum_guttoideum	12.2307	0.246025	0.834358	0.294868	0.768095	0.99403
	Coprococcus	2403.09	-0.107179	0.539427	-0.19869	0.842506	0.987029			Clostridium_septicum	10.524	-1.77565	1.23269	-1.44047	0.149735	0.99403
	Thermosyntropha	3.59083	-0.651814	1.2461	-0.523085	0.600915	0.987029			Acidaminococcus_sp_BV3L6	5.15739	-1.42427	1.21923	-1.16817	0.242736	0.99403
	Alicyclobacillus	159.498	0.57879	0.595095	0.972601	0.330751	0.987029			Eubacterium_hallii	2.91267	2.00599	1.47477	1.3602	0.173766	0.99403
	Sinorhizobium	5.99897	0.662062	1.48114	0.446995	0.654879	0.987029			bacterium_NLAE-zl-C518	3.28372	-1.33011	1.63331	-0.814369	0.415434	0.99403
	Desulfitibacter	0.283565	-1.57992	4.04463	-0.390622	0.696077	0.987029			bacterium_NLAE-zl-C512	7.98074	-1.01147	1.43023	-0.707205	0.479439	0.99403
	Desulfobacterium	0.317293	0.207902	4.08047	0.0509504	0.959365	0.987029			Paenibacillus_barcinonensis	21.1369	-0.621541	1.21902	-0.509871	0.610142	0.99403
	Parabacteroides	45388.4	-1.34249	0.996179	-1.34764	0.177775	0.987029			Clostridiales_bacterium_oral_taxon_085	3.77975	1.48704	1.63541	0.909272	0.363206	0.99403
	Candidatus Cloacamonas	0.527092	-2.47783	3.98139	-0.622353	0.53371	0.987029			Fusobacterium_naviforme	28.0532	1.00855	1.02602	0.982969	0.325622	0.99403
	Acidiphilium	0.881721	2.14115	3.05755	0.700282	0.483751	0.987029			Lactobacillus_sanfranciscensis	17.355	-1.42489	0.833998	-1.7085	0.0875428	0.99403
	Denitrobacterium	0.971747	0.205785	2.02588	0.101578	0.919091	0.987029			Clostridiales_bacterium_80/4	21.8638	-1.95747	1.23688	-1.58258	0.113517	0.99403
	Anaerobiospirillum	3.02203	-1.72029	1.88684	-0.911727	0.361912	0.987029			Clostridiales_bacterium_80/3	3.7289	2.28562	1.51813	1.50555	0.132184	0.99403
	Enterococcus	1601.23	-0.793809	0.549326	-1.44506	0.148441	0.987029			Lachnospiraceae_bacterium_DJF_CP76	49.2428	0.212399	0.674228	0.315025	0.752742	0.99403
	Krokinobacter	2.82317	0.262081	1.56962	0.166971	0.867393	0.987029			Oscillospiraceae_bacterium_AIP_1035_11	62.5212	0.296951	0.857104	0.346458	0.728998	0.99403
	Brachymonas	1.46311	-2.78889	2.35383	-1.18483	0.236084	0.987029			Burkholderia_cenocepacia	3.19596	0.842093	1.3281	0.63406	0.526042	0.99403
	Ralstonia	6.34405	-0.689519	1.25657	-0.548731	0.58319	0.987029			Parabacteroides_merdae	20.5284	-0.955109	1.22861	-0.777389	0.436929	0.99403
	Shuttleworthia	67.7954	-0.0330577	0.620522	-0.0532741	0.957514	0.987029			Alistipes_sp_NML05A004	6.35951	-1.7596	1.4645	-1.2015	0.229557	0.99403
	Dehalobacter	1.14712	1.57414	2.07119	0.760019	0.447243	0.987029			Bacteroides_sp_	417.924	1.73844	1.10892	1.56768	0.116955	0.99403
	Bilophila	3.39975	-1.25269	1.71106	-0.732112	0.4641	0.987029			butyrate-producing_bacterium_R4	7.48578	-1.02261	1.10838	-0.922615	0.356208	0.99403
	Natranaerobius	0.607908	-1.22259	3.0179	-0.405114	0.685394	0.987029			Bacteroides_eggerthii	10.9196	-0.530639	1.20103	-0.441821	0.658619	0.99403
	Candidatus Phytoplasma	6.57551	-0.949783	1.45022	-0.654925	0.512516	0.987029			butyrate-producing_bacterium_SL7/1	4.1748	0.250858	1.15384	0.217411	0.827888	0.99403
	Desulfothermus	0.785958	-1.72672	2.5256	-0.683689	0.494171	0.987029			Roseburia_sp_11SE38	16.6009	-0.7732	0.922667	-0.838006	0.402028	0.99403
	Caldicellulosiruptor	13.7774	0.952277	0.806589	1.18062	0.237753	0.987029			Roseburia_sp_11SE39	20.4574	-0.595869	1.01317	-0.588123	0.55645	0.99403
	Sporosarcina	47.2439	0.514699	0.595419	0.864431	0.387351	0.987029			Roseburia_sp_11SE37	24.3416	-0.575292	0.920265	-0.625137	0.531881	0.99403
	Laceyella	5.53227	1.45986	1.20924	1.20726	0.227333	0.987029			bacterium_NLAE-zl-H343	3.72815	0.271983	1.19931	0.226782	0.820593	0.99403
	Desulfonatronovibrio	4.235	0.114524	1.30498	0.0877593	0.930068	0.987029			bacterium_NLAE-zl-H344	3.47337	0.908473	1.25595	0.723332	0.469476	0.99403
	Hydrogenoanaerobacterium	25.1839	-1.66262	1.02951	-1.61496	0.106319	0.987029			Prevotella_tannerae	5.09665	0.792763	1.33063	0.59578	0.551322	0.99403
	Halothermothrix	2.61822	0.568014	1.57157	0.361431	0.717777	0.987029			bacterium_NLAE-zl-H58	3.73371	0.37932	1.20368	0.315134	0.75266	0.99403
	Enterorhabdus	0.45201	-2.24001	3.26917	-0.685193	0.493222	0.987029			Roseburia_intestinalis	5377.56	-0.471332	0.71516	-0.659059	0.509858	0.99403
	Cyanothece	0.617512	-1.27726	2.72271	-0.469111	0.63899	0.987029			bacterium_NLAE-zl-H52	7.03959	-0.708765	1.00013	-0.708675	0.478526	0.99403
	Butyricimonas	11.8683	0.752565	1.01161	0.743927	0.45692	0.987029			bacterium_NLAE-zl-H55	10.2131	-0.270222	0.970214	-0.278518	0.780615	0.99403
	Saccharopolyspora	0.283565	-1.57992	4.04463	-0.390622	0.696077	0.987029			bacterium_NLAE-zl-G150	4.08255	0.486468	1.15303	0.421902	0.673096	0.99403
	Aerosphaera	0.649106	1.6838	2.96175	0.568516	0.569684	0.987029			Clostridiaceae_bacterium_DJF_B063	15.7614	-0.7275	0.812481	-0.895406	0.37057	0.99403
	Anaerorhabdus	1.66596	1.47785	1.82723	0.808793	0.418634	0.987029			Marinilactibacillus_piezotolerans	4.62169	-2.51101	1.57009	-1.59927	0.10976	0.99403
	Sporobacterium	3.35582	0.0851196	1.34977	0.0630624	0.949717	0.987029			Clostridiales_bacterium_W060	3.94928	1.56263	1.88167	0.830453	0.406283	0.99403
	Pediococcus	53.0897	-0.282152	0.625382	-0.451167	0.651869	0.987029			Blautia_glucerasea	31.8252	-1.42352	0.870347	-1.63558	0.101927	0.99403
	Hyphomicrobium	0.415338	-2.13179	3.81794	-0.558362	0.576597	0.987029			bacterium_NLAE-zl-C251	4.90632	2.22965	1.73583	1.28449	0.19897	0.99403
	Fibrobacter	1.09694	-0.25706	2.48566	-0.103417	0.917632	0.987029			bacterium_NLAE-zl-C252	3.80672	0.986849	1.80446	0.546895	0.584451	0.99403
	Synechococcus	6.74749	-0.216572	1.0432	-0.207604	0.835538	0.987029			bacterium_NLAE-zl-C259	3.71051	0.68797	1.45739	0.472056	0.636887	0.99403
	Bacteroides	300707	-1.24194	1.0726	-1.15788	0.246914	0.987029			Ruminococcus_sp_25F7	4.49316	3.03831	1.81712	1.67205	0.0945152	0.99403
	Fluviicola	17.4516	1.25447	0.908645	1.38059	0.167405	0.987029			Ruminococcus_sp_25F6	2.99847	1.52079	1.43833	1.05733	0.290359	0.99403
	Syntrophus	4.35145	-0.856294	1.23708	-0.692189	0.488819	0.987029			Clostridium_sp_TDO	7.47097	0.196761	1.09637	0.179466	0.857572	0.99403
	Mechercharimyces	0.878114	-0.728448	2.6874	-0.27106	0.786345	0.987029			Parabacteroides_distasonis	53259.4	-1.69163	1.09231	-1.54868	0.121459	0.99403
	Anaerosinus	0.341417	2.04768	4.03941	0.506926	0.612207	0.987029			Pseudoflavonifractor_capillosus	60.4312	0.404602	0.835312	0.484372	0.628122	0.99403
	Tropheryma	1.82309	0.442608	1.81303	0.244126	0.807133	0.987029			bacterium_NLAE-zl-P919	7.6376	-0.989632	0.949456	-1.04232	0.297265	0.99403
	Lacticigenium	0.320237	-1.7329	4.03099	-0.429894	0.667273	0.987029			Alicyclobacillus_contaminans	38.3036	-0.62007	0.773736	-0.801398	0.422901	0.99403
	Filibacter	0.317293	0.207902	4.08047	0.0509504	0.959365	0.987029			Pediococcus_acidilactici	14.3833	-0.35778	0.859121	-0.416449	0.677081	0.99403
	Aromatoleum	0.346765	0.207902	4.08047	0.0509504	0.959365	0.987029			bacterium_NLAE-zl-P878	3.69325	0.828069	1.29575	0.639066	0.52278	0.99403
	Fibrella	1.83105	-0.713338	1.7995	-0.396408	0.691804	0.987029			bacterium_NLAE-zl-P703	4.94774	0.409672	1.14296	0.358431	0.720021	0.99403
	Anoxybacillus	3.89329	-0.0446148	1.16646	-0.0382482	0.96949	0.987029			bacterium_NLAE-zl-P871	7.2332	-1.81318	1.36683	-1.32655	0.184657	0.99403
	Haliscomenobacter	37.7949	0.376998	1.02686	0.367135	0.713518	0.987029			bacterium_NLAE-zl-P870	2.79519	0.408468	1.30769	0.312358	0.754769	0.99403
	Mucispirillum	10.0964	0.804981	1.08527	0.741734	0.458248	0.987029			bacterium_NLAE-zl-P705	4.92732	1.01482	1.2606	0.805027	0.420804	0.99403
	Brevibacillus	19.1816	0.142031	0.704505	0.201604	0.840226	0.987029			Desulfotomaculum_sp_GY-2	5.17677	0.592145	1.13126	0.523437	0.60067	0.99403
	Achromobacter	1.99881	-2.29587	2.25845	-1.01656	0.30936	0.987029			bacterium_NLAE-zl-H504	2.93701	-1.376	1.33823	-1.02822	0.303845	0.99403
	Granulicatella	3.11085	-0.638578	1.56005	-0.409333	0.682295	0.987029			Faecalibacterium_sp_canine_oral_taxon_147	3.30068	0.432878	1.29155	0.335163	0.737502	0.99403
	Meiothermus	4.78256	-2.18935	1.19956	-1.82513	0.0679816	0.987029			Desulfitobacterium_dehalogenans	13.3471	0.18746	0.762969	0.245698	0.805916	0.99403
	Dethiosulfatibacter	0.512807	-0.83073	3.62869	-0.228934	0.81892	0.987029			Lactobacillus_vaginalis	54.5294	-0.527922	1.39334	-0.378889	0.70477	0.99403
	Brucella	4.9756	0.719809	1.17645	0.611848	0.540639	0.987029			Anaerovorax_odorimutans	2.70553	-0.90488	1.44258	-0.627264	0.530486	0.99403
	Verrucomicrobium	8.90497	1.81791	1.49477	1.21619	0.223914	0.987029			Clostridium_aldenense	10.2092	0.370866	0.855393	0.433562	0.664606	0.99403
	Subdoligranulum	6.40517	-0.226774	1.10215	-0.205757	0.836981	0.987029			Lachnospira_multipara	12.8767	0.380761	0.884284	0.430587	0.666769	0.99403
	Rhodomicrobium	0.344361	0.207902	4.08047	0.0509504	0.959365	0.987029			butyrate-producing_bacterium_Ph07AY02	7.55071	-0.456151	1.15587	-0.39464	0.693109	0.99403
	Alkalibacillus	0.607166	-2.66686	3.87123	-0.688891	0.490892	0.987029			bacterium_NLAE-zl-C393	2.99	0.685726	1.47677	0.464343	0.642402	0.99403
	Thermobacillus	1.9886	0.657403	1.7359	0.37871	0.704903	0.987029			Ruminococcus_sp_DJF_VR52	4.0996	-0.174097	1.20617	-0.144339	0.885233	0.99403
	Maribacter	0.95146	-0.872961	2.37928	-0.366901	0.713693	0.987029			Eubacterium_rectale	3114.68	-0.3342	0.6976	-0.479071	0.631888	0.99403
	Massilia	2.18967	-0.563579	1.94994	-0.289023	0.772564	0.987029			Lactobacillus_sp_HG209	3.16294	1.95864	1.80494	1.08516	0.277852	0.99403
	Cellulosilyticum	63.3245	1.1284	0.607169	1.85847	0.063103	0.987029			Marivirga_tractuosa	4.28925	2.19147	1.74829	1.25349	0.210026	0.99403
	Desulfobacter	1.13368	-1.19314	2.27301	-0.524917	0.599641	0.987029			[Ruminococcus]_torques	1595.52	-0.890654	0.661787	-1.34583	0.178357	0.99403
	Belliella	7.59753	0.495468	0.993634	0.498643	0.618031	0.987029			Alicyclobacillus_pomorum	6.65427	0.412547	1.03876	0.397153	0.691255	0.99403
	Thermoanaerobacterium	35.9915	-0.426736	0.687236	-0.620945	0.534636	0.987029			Clostridium_chauvoei	8.30543	-0.624137	1.22878	-0.507933	0.6115	0.99403
	Caldithrix	1.68859	0.684469	1.98102	0.345513	0.729709	0.987029			Desulfotomaculum_sp_Iso-W2	6.06895	0.385093	1.18061	0.326181	0.744287	0.99403
	Sejongia	0.331003	2.00909	4.04294	0.496936	0.619234	0.987029			Macrococcus_caseolyticus	3.41491	-0.199063	1.22459	-0.162555	0.870869	0.99403
	Advenella	0.502393	-0.8311	3.65397	-0.227451	0.820073	0.987029			Clostridium_sp_TG60-81	7.17124	1.31328	1.26428	1.03875	0.298919	0.99403
	Methylophaga	0.98162	1.26586	2.18364	0.579701	0.562116	0.987029			human_intestinal_firmicute_CJ6	30.5385	0.243774	0.926372	0.263149	0.792435	0.99403
	Marichromatium	1.1515	0.566283	2.20937	0.25631	0.797711	0.987029			Butyrivibrio_sp_K3	6.86338	-0.212579	1.09236	-0.194606	0.845702	0.99403
	Leptospira	0.283565	-1.57992	4.04463	-0.390622	0.696077	0.987029			Lachnospiraceae_bacterium_oral_taxon_373	21.837	0.690518	0.914358	0.755194	0.450133	0.99403
	Syntrophococcus	15.1609	-0.467202	0.767855	-0.608451	0.542889	0.987029			bacterium_NLAE-zl-G131	2.99793	0.303287	1.55674	0.194822	0.845533	0.99403
	Jonquetella	1.72344	-0.59032	1.71876	-0.343457	0.731255	0.987029			Ruminococcus_sp_CO47	4.13314	-1.84728	1.63689	-1.12853	0.259097	0.99403
	Salimicrobium	0.455375	-2.2516	3.99391	-0.563759	0.572918	0.987029			Ruminococcus_sp_CO41	2.6689	-0.460792	1.38019	-0.333861	0.738485	0.99403
	Epulopiscium	5.42105	0.443014	1.07579	0.411803	0.680484	0.987029			Clostridium_sp_Clone-40	10.7478	-0.860472	0.853398	-1.00829	0.313316	0.99403
	Thermomonospora	0.307689	0.207902	4.08047	0.0509504	0.959365	0.987029			Lactobacillus_iatae	4.29132	1.22713	1.49844	0.818935	0.412823	0.99403
	Mesorhizobium	0.688723	0.0885228	3.29451	0.0268698	0.978564	0.9892			Clostridium_sp_Clone-44	5.46414	-0.714037	1.15202	-0.61981	0.535383	0.99403
	Acidithiobacillus	8.62946	0.024711	1.00522	0.0245827	0.980388	0.989252			Clostridium_sp_Clone-46	8.33168	-0.420937	1.00729	-0.417892	0.676026	0.99403
	Melissococcus	4.82596	0.0209131	1.07066	0.0195329	0.984416	0.991524			Clostridium_sp_Clone-47	21.0385	0.824206	0.705605	1.16808	0.242773	0.99403
	Saccharofermentans	10.0414	-0.00548895	0.839262	-0.00654021	0.994782	0.997567			Clostridium_sp_Clone-49	18.3152	-0.409682	0.7628	-0.537076	0.591215	0.99403
	Hespellia	11.7252	-0.0046879	0.882597	-0.00531148	0.995762	0.997567			bacterium_NLAE-zl-C231	6.64124	-0.599749	1.00058	-0.599399	0.548907	0.99403
	Acinetobacter	4.12748	-0.00447709	1.46816	-0.00304945	0.997567	0.997567			Corynebacterium_diphtheriae	45.9957	0.509163	0.845967	0.601871	0.54726	0.99403
	Pseudanabaena	1.40256	-0.0107492	2.31326	-0.00464678	0.996292	0.997567			bacterium_NLAE-zl-P855	4.63574	0.798402	1.19334	0.669047	0.503465	0.99403
										Lactobacillus_sp_L-YJ	3.93724	0.545681	1.71703	0.317806	0.750632	0.99403
										bacterium_NLAE-zl-H528	3.36	-0.61538	1.7679	-0.348085	0.727776	0.99403
										Bacteroides_stercoris	5.53606	-0.219067	1.35985	-0.161096	0.872018	0.99403
										bacterium_NLAE-zl-H521	5.12526	0.236341	1.13942	0.207421	0.835681	0.99403
										bacterium_NLAE-zl-H520	3.34559	0.720033	1.28889	0.558648	0.576402	0.99403
										Clostridiales_bacterium_APG1	3.13314	1.6069	1.35677	1.18436	0.23627	0.99403
										bacterium_ic1214	8.29117	-2.40662	1.55952	-1.54318	0.122787	0.99403
										Desulfohalobium_retbaense	7.1882	-0.285451	1.2904	-0.221212	0.824927	0.99403
										Clostridium_sp_Culture-57	34.4339	-1.05259	0.758655	-1.38744	0.165308	0.99403
										Clostridium_sp_Culture-54	11.4495	-0.295476	0.898955	-0.328688	0.742391	0.99403
										Eubacterium_siraeum	1877.34	-0.244625	0.56291	-0.434572	0.663873	0.99403
										butyrate-producing_bacterium_L1-81	6.35114	-0.267753	1.16254	-0.230318	0.817845	0.99403
										rumen_bacterium_RC7r-54	4.1131	1.01585	1.38897	0.731369	0.464554	0.99403
										[Clostridium]_glycolicum	76.7385	-1.88667	1.23328	-1.5298	0.126067	0.99403
										Amphibacillus_xylanus	88.893	0.119388	0.608408	0.19623	0.84443	0.99403
										Prevotella_sp_	3.41198	1.27154	1.76555	0.720195	0.471405	0.99403
										Weeksella_virosa	2.72314	0.631108	1.68597	0.374329	0.70816	0.99403
										Alistipes_massiliensis	7.11928	0.243903	1.65735	0.147164	0.883003	0.99403
										Parasutterella_excrementihominis	58.7168	-1.49069	1.31787	-1.13114	0.257998	0.99403
										butyrate-producing_bacterium_T2-132	3.66593	0.208919	1.15515	0.180859	0.856478	0.99403
										bacterium_NLAE-zl-C85	3.41862	-0.950077	1.28291	-0.740566	0.458956	0.99403
										bacterium_NLAE-zl-P130	3.48245	-0.748714	1.25761	-0.595346	0.551612	0.99403
										Blautia_sp_canine_oral_taxon_337	13.4734	-0.123492	0.881503	-0.140093	0.888586	0.99403
										Ralstonia_solanacearum	3.92776	-1.83342	1.46381	-1.2525	0.210387	0.99403
										Sinorhizobium_fredii	3.04594	-0.456365	1.85834	-0.245576	0.80601	0.99403
										bacterium_NLAE-zl-P607	2.787	0.380073	1.57435	0.241416	0.809232	0.99403
										bacterium_NLAE-zl-G444	3.73779	0.596392	1.18062	0.505152	0.613452	0.99403
										Clostridium_sp_VKM_B-2279	8.48917	-2.39624	1.64902	-1.45313	0.146187	0.99403
										rumen_bacterium_NK2B42	9.0286	-0.166173	1.03119	-0.161146	0.871978	0.99403
										cf_Oscillospira_sp_BA04013493	4.35053	2.40496	1.42311	1.68993	0.0910413	0.99403
										Coprococcus_comes	3.72536	0.3685	1.18427	0.311163	0.755677	0.99403
										[Clostridium]_bartlettii	6.86148	-1.98931	1.509	-1.31829	0.187405	0.99403
										Actinobacillus_pleuropneumoniae	42.9762	-0.828751	0.712479	-1.16319	0.244751	0.99403
										Eubacterium_fissicatena	64.5461	-0.210482	0.636956	-0.33045	0.74106	0.99403
										Clostridium_sp_JPL_22	5.13347	-0.500097	1.13654	-0.440019	0.659923	0.99403
										bacterium_NLAE-zl-H297	4.55892	0.289812	1.153	0.251355	0.80154	0.99403
										bacterium_NLAE-zl-H296	2.78911	1.35376	1.42209	0.95195	0.341122	0.99403
										bacterium_NLAE-zl-H291	4.14	1.27567	1.22338	1.04274	0.297069	0.99403
										bacterium_NLAE-zl-H293	4.08175	0.699391	1.16667	0.599475	0.548856	0.99403
										Belliella_baltica	7.92337	0.293359	1.01563	0.288844	0.772701	0.99403
										bacterium_NLAE-zl-H298	3.21773	2.17545	1.64106	1.32563	0.184961	0.99403
										Clostridium_sp_6-16	9.1941	1.66112	1.31142	1.26666	0.205277	0.99403
										Blautia_wexlerae	6.08107	0.393723	0.981857	0.400998	0.688421	0.99403
										bacterium_NLAE-zl-C411	3.31854	0.436495	1.48957	0.293034	0.769496	0.99403
										Clostridium_sporosphaeroides	7.3532	-0.300161	0.995119	-0.301633	0.762932	0.99403
										Sporosarcina_ureae	2.84478	-1.71935	1.55204	-1.1078	0.267947	0.99403
										Blautia_sp_A-C4-0	5.11834	-0.213409	1.07192	-0.19909	0.842193	0.99403
										Bacteroides_finegoldii	2.8279	0.693354	1.77912	0.389719	0.696745	0.99403
										Bacillus_amyloliquefaciens	20.3892	0.360385	0.721739	0.499328	0.617548	0.99403
										Clostridium_ramosum	91.227	-1.27791	0.980829	-1.30289	0.192614	0.99403
										Clostridium_sp_B907-1	3.8928	0.354222	1.17285	0.302018	0.762638	0.99403
										bacterium_NLAE-zl-P303	2.91073	-0.480669	1.48157	-0.324433	0.74561	0.99403
										Lactobacillus_gallinarum	16.6992	0.50676	1.40037	0.361876	0.717445	0.99403
										Clostridium_sp_WST-8	4.72596	1.46754	1.18759	1.23574	0.216557	0.99403
										butyrate-producing_bacterium_A2-232	4.33679	-0.375033	1.23562	-0.303519	0.761494	0.99403
										butyrate-producing_bacterium_A2-231	3.29911	-0.313682	1.26178	-0.248603	0.803668	0.99403
										Veillonella_magna	4.46786	-1.07105	1.11176	-0.963383	0.335355	0.99403
										bacterium_NLAE-zl-H62	8.1629	0.625312	1.12308	0.556783	0.577676	0.99403
										Eubacterium_oxidoreducens	70.3382	-0.629602	0.744105	-0.84612	0.397486	0.99403
										Shuttleworthia_sp_MSX8B	3.41385	0.387313	1.31085	0.295468	0.767636	0.99403
										Clostridiales_bacterium_DJF_B034	3.55755	-1.01839	1.35607	-0.750984	0.452663	0.99403
										rumen_bacterium_NK4A66	100.647	0.772619	1.23397	0.626127	0.531232	0.99403
										rumen_bacterium_NK4A61	3.97832	0.226515	1.18495	0.19116	0.8484	0.99403
										rumen_bacterium_NK4A63	4.18901	1.06833	1.31429	0.81286	0.416298	0.99403
										Firmicutes_bacterium_DJF_VR50	3.59579	-1.18485	1.34759	-0.879233	0.379275	0.99403
										Clostridiales_bacterium_30-4c	186.509	0.167169	0.758811	0.220304	0.825634	0.99403
										bacterium_YE64	6.81147	0.1398	1.00271	0.139422	0.889117	0.99403
										bacterium_YE60	3.66075	-0.882233	1.41479	-0.623579	0.532904	0.99403
										Bacteroides_sp_CR-5	2.70221	0.612906	1.59385	0.384545	0.700574	0.99403
										Clostridium_sp_Iso-W3	7.81614	0.278328	0.930508	0.299114	0.764853	0.99403
										Clostridium_novyi	15.8836	0.23738	0.737316	0.321951	0.74749	0.99403
										Clostridium_leptum	26.9209	0.263533	0.674569	0.390669	0.696042	0.99403
										Syntrophococcus_sp_BS-2	4.43937	-0.328501	1.13823	-0.288607	0.772882	0.99403
										Bacteroides_sp_W7	2.7186	0.4448	1.75267	0.253785	0.799662	0.99403
										Lachnospiraceae_genomosp_C1	17.3559	1.03843	0.907474	1.14431	0.252496	0.99403
										Clostridium_sp_OkiF101	5.18905	0.952839	1.03764	0.918275	0.358475	0.99403
										bacterium_NLAE-zl-C62	3.66287	0.198485	1.19244	0.166453	0.8678	0.99403
										bacterium_NLAE-zl-C60	2.95682	0.449771	1.5543	0.289372	0.772296	0.99403
										Clostridiales_bacterium_A2-162	10.5693	0.263534	0.927291	0.284197	0.776259	0.99403
										Clostridia_bacterium_S130(2)-2	12.3646	-0.256445	0.923555	-0.277672	0.781264	0.99403
										Clostridium_sp_YIT_12069	43.4249	-1.05531	0.637172	-1.65624	0.0976728	0.99403
										Halothiobacillus_sp_HL2	3.66016	-1.11796	1.36738	-0.817594	0.413589	0.99403
										bacterium_NLAE-zl-G488	7.66176	1.25771	0.992204	1.26759	0.204943	0.99403
										Clostridium_sp_RT2	6.19122	0.329257	1.12659	0.292261	0.770087	0.99403
										Clostridium_sp_RT8	6.36807	0.844796	1.03044	0.819839	0.412308	0.99403
										rumen_bacterium_NK4A237	2.85803	2.9112	1.68933	1.72329	0.0848364	0.99403
										rumen_bacterium_NK4A235	3.23447	0.744526	1.30894	0.568801	0.569491	0.99403
										Clostridium_baratii	5.05673	-1.62702	1.37926	-1.17963	0.238147	0.99403
										Streptococcus_equi	35.8582	-0.776958	0.74527	-1.04252	0.297171	0.99403
										Eggerthella_sp_YY7918	43.4333	-0.735404	0.737471	-0.997197	0.318669	0.99403
										Acidaminococcus_fermentans	176.408	-0.980423	1.25086	-0.783797	0.43316	0.99403
										Prevotella_intermedia	61.7488	0.819128	0.996746	0.821802	0.411189	0.99403
										rumen_bacterium_NK4B114	3.96836	-1.31305	1.24515	-1.05453	0.291642	0.99403
										Anaerobiospirillum_succiniciproducens	3.77312	-2.0929	1.89691	-1.10332	0.269889	0.99403
										Desulfovibrio_sp_D4	4.17941	-0.618347	1.33094	-0.464593	0.642223	0.99403
										Brachyspira_pilosicoli	36.3897	-0.784205	0.733751	-1.06876	0.285178	0.99403
										Bacteroides_sp_TP-5	13.6357	-1.52207	1.4151	-1.07559	0.282112	0.99403
										Clostridium_saccharolyticum	3629.53	-0.0996233	0.539584	-0.18463	0.853519	0.99403
										Lactobacillus_pentosus	5.26819	-1.45622	1.26896	-1.14757	0.251147	0.99403
										Oribacterium_sp_CM12	3.05046	0.877776	1.33988	0.655118	0.512392	0.99403
										Desulfovibrio_sp_DSM12803	2.78685	0.396321	1.31559	0.301251	0.763223	0.99403
										Sporomusa_termitida	2.6761	-0.932821	1.51933	-0.613969	0.539236	0.99403
										rumen_bacterium_NK4A44	4.19636	-0.294552	1.19915	-0.245633	0.805966	0.99403
										Helicobacter_winghamensis	6.03691	1.52154	1.48441	1.02501	0.305357	0.99403
										Carnobacterium_sp_17-4	6.14611	-0.333102	1.06653	-0.312323	0.754795	0.99403
										Anaerotruncus_colihominis	46.4674	-0.353308	0.832767	-0.424258	0.671378	0.99403
										bacterium_NLAE-zl-C403	8.84522	1.7911	0.992212	1.80516	0.0710495	0.99403
										Veillonella_sp_oral_taxon_780	2.83729	-1.035	1.44996	-0.713812	0.475344	0.99403
										Arcobacter_butzleri	2.89598	-1.78316	1.58005	-1.12855	0.259089	0.99403
										bacterium_NLAE-zl-G413	4.63979	1.06883	1.13196	0.94423	0.345052	0.99403
										bacterium_NLAE-zl-P177	7.85514	-1.70976	1.49297	-1.14521	0.252124	0.99403
										Sporomusa_malonica	2.80772	-1.0413	1.53456	-0.678563	0.497415	0.99403
										bacterium_NLAE-zl-H384	5.20209	-0.234456	1.07415	-0.218272	0.827217	0.99403
										bacterium_AN1045	53.4387	1.2318	0.839577	1.46717	0.142329	0.99403
										Lachnospiraceae_bacterium_ICM62	3.06466	0.781577	1.2671	0.616822	0.537352	0.99403
										rumen_bacterium_NK4A214	123.908	1.1054	0.717899	1.53977	0.123616	0.99403
										rumen_bacterium_NK4A212	10.8755	1.39397	1.07816	1.29292	0.19604	0.99403
										Clostridium_sp_T1'2	5.41498	0.545687	1.05378	0.517839	0.60457	0.99403
										rumen_bacterium_NK4A142	4.05971	1.94282	1.25736	1.54516	0.122307	0.99403
										Ruminococcus_sp_RLB3	8.5497	-1.52742	0.98045	-1.55788	0.119262	0.99403
										Ruminococcus_sp_RLB1	10.7306	-1.33309	0.934762	-1.42612	0.153832	0.99403
										Lactobacillus_fermentum	256.066	-0.362538	0.908979	-0.398841	0.690011	0.99403
										Prevotella_sp_canine_oral_taxon_226	4.52368	1.0068	1.48699	0.677074	0.498359	0.99403
										Porphyromonas_gingivicanis	7.71076	0.322184	1.37778	0.233844	0.815106	0.99403
										unidentified_eubacterium_clone_BSV61	5.44152	0.25168	1.12535	0.223647	0.823032	0.99403
										unidentified_bacterium_ZF3	3.51742	-0.567109	1.27869	-0.443507	0.657399	0.99403
										unidentified_bacterium_ZF1	5.5571	0.839787	1.02212	0.821611	0.411299	0.99403
										Clostridium_sp_Clone-26	12.4219	0.305018	0.82398	0.370176	0.711251	0.99403
										Clostridium_sp_Clone-27	8.41256	-0.69766	0.893878	-0.780487	0.435104	0.99403
										Clostridium_sp_Clone-24	16.3908	0.283754	0.752127	0.377268	0.705974	0.99403
										Clostridium_sp_Clone-25	4.30104	-0.512197	1.24533	-0.411296	0.680856	0.99403
										Bacillus_halodurans	45.8109	-0.200075	0.62068	-0.322348	0.747189	0.99403
										Streptococcus_gallolyticus	56.7311	-0.830172	0.67036	-1.2384	0.215569	0.99403
										Geobacillus_sp_Y412MC61	2.82385	-1.75734	1.4024	-1.25309	0.210172	0.99403
										Clostridiales_bacterium_CIEAF_030	52.5024	-0.461896	0.694056	-0.665503	0.505729	0.99403
										Bacillus_endophyticus	23.872	0.170834	0.716426	0.238453	0.81153	0.99403
										Aequorivita_sublithincola	5.72174	-0.519639	1.11492	-0.466077	0.64116	0.99403
										Bifidobacterium_animalis	4425.42	-1.37842	0.790212	-1.74436	0.0810956	0.99403
										Acidaminococcus_intestini	240.842	-0.52166	0.778328	-0.670232	0.50271	0.99403
										bacterium_YE266	16.7971	-0.413255	0.769538	-0.537017	0.591256	0.99403
										Desulfovibrio_sp_ABHU1SBfatS	48.1856	-0.353931	0.681857	-0.519069	0.603712	0.99403
										Clostridium_hungatei	6.60079	-0.627755	0.973248	-0.64501	0.518921	0.99403
										bacterium_ic1272	22.4029	0.136369	0.98392	0.138597	0.889768	0.99403
										bacterium_ic1277	4.56628	-1.89732	1.26605	-1.49861	0.133975	0.99403
										Flavobacterium_columnare	11.7175	-0.574992	1.1144	-0.515964	0.605879	0.99403
										bacterium_10C29	20.4939	0.168195	0.822672	0.20445	0.838002	0.99403
										bacterium_NLAE-zl-P343	4.25375	-2.0168	1.63486	-1.23363	0.217343	0.99403
										bacterium_NLAE-zl-P340	4.2224	-1.61176	1.52285	-1.05838	0.289881	0.99403
										bacterium_NLAE-zl-H490	6.66537	1.09032	1.31634	0.828295	0.407503	0.99403
										rumen_bacterium_NK4A21	10.8669	0.989183	0.999815	0.989365	0.322484	0.99403
										Burkholderia_pseudomallei	7.25356	0.340083	1.41117	0.240993	0.809561	0.99403
										bacterium_NLAE-zl-C1	3.38683	-0.469854	1.23989	-0.378947	0.704727	0.99403
										bacterium_NLAE-zl-G349	9.00966	0.303712	0.898483	0.338028	0.735342	0.99403
										Clostridium_hylemonae	81.5888	0.402005	0.796054	0.504997	0.613561	0.99403
										Clostridium_sp_Kas401-4	5.52412	1.1683	1.03948	1.12392	0.261045	0.99403
										Oribacterium_sp_ACB7	3.07778	-0.409595	1.35774	-0.301674	0.762901	0.99403
										Oribacterium_sp_ACB1	3.20902	0.600083	1.24686	0.481276	0.63032	0.99403
										Oribacterium_sp_ACB8	3.67394	0.677255	1.18002	0.573936	0.566011	0.99403
										Barnesiella_sp_EBA4-14	13.1995	1.85853	1.10221	1.68618	0.0917606	0.99403
										Pediococcus_cellicola	3.40856	-1.04282	1.89089	-0.551499	0.581292	0.99403
										Gemella_haemolysans	10.2579	-0.519327	0.985795	-0.52681	0.598325	0.99403
										Oribacterium_sp_OBRC12	2.88319	0.342794	1.40477	0.244022	0.807214	0.99403
										Butyrivibrio_sp_4C79CA	4.28572	2.27177	1.33488	1.70185	0.0887829	0.99403
										bacterium_NLAE-zl-C27	4.43366	-0.238117	1.15923	-0.205411	0.837251	0.99403
										bacterium_NLAE-zl-C25	4.50752	0.548441	1.12903	0.485763	0.627135	0.99403
										Johnsonella_sp_oral_taxon_166	11.2175	-0.588586	0.83413	-0.705629	0.480419	0.99403
										Polynucleobacter_cosmopolitanus	11.5648	-0.39629	0.822257	-0.481953	0.629839	0.99403
										butyrate-producing_bacterium_PH07BW10	8.1949	-0.138308	0.901665	-0.153391	0.87809	0.99403
										Clostridiaceae_bacterium_80Wc	2.98678	1.33028	1.50331	0.8849	0.376211	0.99403
										Clostridium_pasteurianum	2.90099	-1.80003	1.99269	-0.903318	0.366357	0.99403
										Clostridium_saccharogumia	35.6066	-1.59393	0.97834	-1.62921	0.103268	0.99403
										Bacillus_cytotoxicus	4.1998	0.442731	1.21968	0.362989	0.716613	0.99403
										Bacteroides_acidifaciens	29.3898	-0.994499	1.248	-0.796874	0.425524	0.99403
										Clostridium_sp_cTPY-17	5.11608	0.168173	1.1166	0.150613	0.880281	0.99403
										bacterium_NLAE-zl-G423	9.25115	0.365602	0.842644	0.433874	0.66438	0.99403
										Bacillus_weihenstephanensis	10.0015	-1.52658	0.903564	-1.68951	0.0911217	0.99403
										Haemophilus_influenzae	47.5137	-0.529381	0.654469	-0.808871	0.418589	0.99403
										swine_fecal_bacterium_RF2B-Pec5	3.49695	-2.67775	1.89557	-1.41264	0.157763	0.99403
										Clostridiales_bacterium_CIEAF_015	18.1951	1.13425	0.823083	1.37805	0.168188	0.99403
										Clostridiales_bacterium_CIEAF_017	165.764	-1.08009	0.818365	-1.31982	0.186896	0.99403
										Desulfotomaculum_sp_SN1_H	4.77148	0.223173	1.20124	0.185786	0.852613	0.99403
										Clostridiales_bacterium_CIEAF_019	125.445	0.146626	0.805852	0.181951	0.855621	0.99403
										Dorea_longicatena	46.2894	-0.602864	0.745579	-0.808585	0.418754	0.99403
										Clostridium_symbiosum	20.4405	-0.427824	0.865695	-0.494198	0.621167	0.99403
										Wolinella_sp_canine_oral_taxon_173	5.691	-1.54877	1.42065	-1.09019	0.275631	0.99403
										Alkalitalea_saponilacus	4.93231	1.9936	1.68756	1.18135	0.237466	0.99403
										Clostridium_sp_KOPRI80182	6.04243	-0.619814	1.09947	-0.563739	0.572932	0.99403
										Flavobacterium_johnsoniae	6.44336	-0.964627	1.11658	-0.863916	0.387634	0.99403
										bacterium_ic1291	6.61128	-0.449776	0.948421	-0.474236	0.635332	0.99403
										bacterium_ic1294	11.2149	-1.38319	0.85344	-1.62072	0.105078	0.99403
										bacterium_ic1296	4.72266	-0.47897	1.08705	-0.440613	0.659493	0.99403
										Staphylococcus_epidermidis	14.0656	-0.332273	0.752229	-0.441718	0.658693	0.99403
										Clostridium_sp_C9	5.82817	1.11752	1.02865	1.08639	0.277305	0.99403
										Desulfovibrio_sp_ABHU1SB	49.0213	-0.596627	0.661164	-0.902389	0.36685	0.99403
										bacterium_NLAE-zl-P415	4.04098	0.556559	1.29882	0.42851	0.66828	0.99403
										bacterium_NLAE-zl-H75	51.7789	0.780243	1.11999	0.69665	0.486022	0.99403
										Syntrophus_aciditrophicus	4.31415	-0.970384	1.21297	-0.800004	0.423708	0.99403
										bacterium_NLAE-zl-H164	2.99448	2.05322	1.45258	1.4135	0.15751	0.99403
										Desulfovibrio_sp_ABHU2SB	66.3444	-0.600361	0.693165	-0.866114	0.386427	0.99403
										Clostridiales_bacterium_DJF_RP51	5.77251	0.19527	0.993282	0.196591	0.844148	0.99403
										Clostridiaceae_bacterium_CP19	7.28548	0.375636	1.03379	0.363357	0.716338	0.99403
										anaerobic_bacterium_A112	2.72966	-0.255877	1.47757	-0.173174	0.862515	0.99403
										Stenotrophomonas_maltophilia	2.74989	-1.22036	1.3607	-0.89686	0.369793	0.99403
										Clostridium_sp_40	12.0687	-1.75601	1.26227	-1.39115	0.164179	0.99403
										Clostridium_sp_46	2.78381	-2.32615	1.93129	-1.20445	0.228414	0.99403
										Clostridium_sp_47	3.17167	-0.734348	1.83351	-0.400515	0.688777	0.99403
										Eubacteriaceae_bacterium_DJF_CR57k1	3.46446	1.06193	1.45292	0.73089	0.464846	0.99403
										Clostridium_sp_Culture_Jar-44	7.14172	-0.570571	0.996662	-0.572482	0.566995	0.99403
										Clostridium_colinum	7.37405	0.477626	1.10806	0.431048	0.666434	0.99403
										Firmicutes_bacterium_SE1905	6.39792	0.913674	1.11647	0.818363	0.41315	0.99403
										Helicobacter_pullorum	19.6411	1.73894	1.46949	1.18337	0.236664	0.99403
										Lactobacillus_sp_MF213	3.11227	-0.67847	1.85567	-0.365619	0.714649	0.99403
										rumen_bacterium_NK3B98	103.502	1.03883	0.80372	1.29252	0.196176	0.99403
										Porphyromonadaceae_bacterium_canine_oral_taxon_184	6.10794	0.296765	1.28679	0.230625	0.817606	0.99403
										Clostridium_scindens	116.132	-0.673685	0.618194	-1.08976	0.275818	0.99403
										Acetivibrio_ethanolgignens	29.5547	1.07268	0.862622	1.24351	0.213679	0.99403
										[Clostridium]_sticklandii	9.89957	-1.52946	1.13173	-1.35143	0.176557	0.99403
										Alkaliphilus_oremlandii	13.2239	-0.449061	0.849345	-0.528714	0.597004	0.99403
										Blautia_hansenii	25.1808	0.109008	0.64779	0.168277	0.866365	0.99403
										Ruminococcus_sp_M-1	7.84374	0.614969	0.935585	0.65731	0.510982	0.99403
										Flexibacter_litoralis	3.45817	-0.30506	1.81313	-0.168251	0.866386	0.99403
										Clostridium_sp_	55.0806	0.302177	0.617448	0.489396	0.624561	0.99403
										Melissococcus_plutonius	4.83227	-0.164667	1.04471	-0.157619	0.874757	0.99403
										Clostridium_proteoclasticum	318.363	0.311041	0.582679	0.533812	0.593471	0.99403
										Prevotella_oris	3.47523	1.33666	1.5786	0.846734	0.397143	0.99403
										Clostridiaceae_bacterium_SH021	6.62577	-0.72034	1.11871	-0.643903	0.519639	0.99403
										Streptococcus_mutans	70.2861	-0.616039	0.653566	-0.942581	0.345895	0.99403
										Oribacterium_sp_4C51CB	2.77426	0.388257	1.34226	0.289256	0.772386	0.99403
										Porphyromonas_levii	13.8467	0.160959	1.09552	0.146925	0.883191	0.99403
										Megamonas_hypermegale	34.9036	-0.682878	0.947702	-0.720562	0.471179	0.99403
										Clostridium_aerotolerans	6.71747	1.04981	0.988264	1.06227	0.288111	0.99403
										Syntrophococcus_sucromutans	11.0368	-0.814715	0.845223	-0.963904	0.335094	0.99403
										Peptostreptococcaceae_bacterium_canine_oral_taxon_332	4.76723	0.402901	1.14428	0.352099	0.724764	0.99403
										bacterium_BAF4	5.80401	-1.68549	1.1258	-1.49715	0.134354	0.99403
										Geobacillus_thermoleovorans	7.69485	-0.95899	1.03719	-0.924605	0.355171	0.99403
										Clostridium_sp_14505	5.89872	-1.0178	1.00504	-1.01269	0.311208	0.99403
										Lachnospiraceae_bacterium_DJF_VP08k1	4.9485	-0.172024	1.05254	-0.163438	0.870174	0.99403
										Desulfovibrio_africanus	5.80603	0.211149	1.05963	0.199267	0.842054	0.99403
										Selenomonas_sp_oral_taxon_F85	4.33344	2.64494	1.56337	1.69182	0.0906807	0.99403
										Trigonala_elaeagnus	12.0568	-0.240793	0.845348	-0.284845	0.775763	0.99403
										human_oral_bacterium_C73	2.80273	1.05171	1.41001	0.74589	0.455734	0.99403
										Paenibacillus_graminis	4.91327	-0.326817	1.13203	-0.288701	0.772811	0.99403
										actinobacterium_BVF2	5.52065	-1.69934	1.08241	-1.56996	0.116425	0.99403
										Collimonas_fungivorans	8.11998	-1.88821	1.51014	-1.25035	0.211171	0.99403
										Clostridium_sp_NML_04A032	91.719	0.322573	0.758148	0.425475	0.67049	0.99403
										bacterium_NLAE-zl-C605	7.7781	1.16058	1.08862	1.0661	0.286377	0.99403
										bacterium_NLAE-zl-C604	3.05384	0.588795	1.35936	0.433141	0.664913	0.99403
										bacterium_NLAE-zl-C601	2.73629	-1.17501	1.4426	-0.814506	0.415355	0.99403
										bacterium_NLAE-zl-C608	5.0622	0.45153	1.13692	0.397152	0.691255	0.99403
										Helicobacter_sp_MIT_04-8588	10.6444	1.62767	1.65878	0.981249	0.32647	0.99403
										Pasteurella_multocida	33.4679	-0.882012	0.718451	-1.22766	0.219576	0.99403
										Desulfovibrio_sp_oral_taxon_040	44.7653	-0.666519	0.683681	-0.974898	0.329611	0.99403
										Bifidobacterium_bifidum	168.08	-0.600613	0.715871	-0.838996	0.401471	0.99403
										Acetivibrio_cellulolyticus	7.66651	-0.488321	1.08859	-0.448581	0.653734	0.99403
										Clostridium_glycyrrhizinilyticum	5.67658	-1.44251	1.29015	-1.11809	0.263528	0.99403
										Clostridiales_bacterium_33-7e	5.28165	0.175341	1.04257	0.168181	0.866441	0.99403
										Aerococcus_urinae	19.9631	0.311309	0.849805	0.36633	0.714119	0.99403
										Desulfovibrio_sp_UNSW3caefatS	6.13755	-0.61552	1.14868	-0.535852	0.592061	0.99403
										Lactobacillus_delbrueckii	269.841	0.327522	1.11404	0.293996	0.768761	0.99403
										Bacteroides_sp_CJ78	3.23473	-2.47293	2.06203	-1.19927	0.230422	0.99403
										Riemerella_anatipestifer	11.0149	0.29219	1.25776	0.232309	0.816298	0.99403
										bacterium_Te15A	4.91483	-0.178082	1.11349	-0.159931	0.872935	0.99403
										Clostridiaceae_bacterium_DJF_LS13	30.12	-0.654517	0.701169	-0.933465	0.35058	0.99403
										Bacteroides_sp_Smarlab_3302398	7.5471	-1.08164	1.8525	-0.583882	0.5593	0.99403
										Helicobacter_canadensis	12.6926	1.26813	1.39239	0.910761	0.362421	0.99403
										bacterium_str_31285	3.85702	-2.08829	1.9916	-1.04855	0.294385	0.99403
										Porphyromonas_crevioricanis	36.0651	0.826317	0.991971	0.833005	0.404842	0.99403
										Veillonella_parvula	63.6795	-0.898619	0.856825	-1.04878	0.29428	0.99403
										bacterium_NLAE-zl-C350	3.97476	0.854659	1.17133	0.729651	0.465603	0.99403
										Eubacterium_ramulus	6.3692	0.477136	1.09022	0.437653	0.661638	0.99403
										Elizabethkingia_meningoseptica	3.03977	1.18027	1.56305	0.755102	0.450188	0.99403
										swine_fecal_bacterium_RF3E-Cel1	21.2484	-0.933664	1.08282	-0.862256	0.388546	0.99403
										Lachnospiraceae_bacterium_DJF_B223	3.58637	-0.630777	1.23887	-0.509155	0.610643	0.99403
										[Eubacterium]_infirmum	14.8552	-0.60366	0.784405	-0.769577	0.441551	0.99403
										Dorea_formicigenerans	18.1872	-0.642268	0.741557	-0.866107	0.386431	0.99403
										Streptococcus_suis	2947.23	-0.628764	0.566769	-1.10938	0.267265	0.99403
										Brevibacillus_brevis	13.0739	-0.54575	0.787924	-0.692644	0.488533	0.99403
										bacterium_NLAE-zl-H434	2.87188	-1.43772	1.44129	-0.997526	0.318509	0.99403
										Clostridium_fusiformis	95.1893	-0.382163	0.651997	-0.586143	0.55778	0.99403
										Lactobacillus_salivarius	21.858	-1.44659	0.819456	-1.7653	0.0775126	0.99403
										Enterococcus_faecium	649.196	-0.307919	0.635106	-0.48483	0.627797	0.99403
										Bacteroides_sp_1AL	4.78048	-1.91214	1.76263	-1.08482	0.278002	0.99403
										Paraprevotella_clara	3.06337	-0.572579	1.62156	-0.353104	0.724011	0.99403
										Staphylococcus_chromogenes	5.48755	0.987772	1.03975	0.950011	0.342107	0.99403
										Eubacterium_sp_oral_strain_A35MT	3.46471	-1.26266	1.28759	-0.980643	0.326769	0.99403
										Blautia_sp_Ser8	16.636	0.539131	0.766421	0.703439	0.481782	0.99403
										Bacteroides_sp_F-4	4.92673	0.361063	1.23345	0.292726	0.769732	0.99403
										bacterium_NLAE-zl-H398	3.66377	-0.336423	1.19378	-0.281812	0.778087	0.99403
										Peptococcus_sp_canine_oral_taxon_044	11.914	0.164003	0.855881	0.191619	0.848041	0.99403
										Weissella_koreensis	7.47211	-0.662788	1.03488	-0.640451	0.521879	0.99403
										bacterium_NLAE-zl-C488	10.4578	0.937539	1.03273	0.907823	0.363972	0.99403
										bacterium_NLAE-zl-C481	9.1681	1.79374	1.22642	1.46258	0.143583	0.99403
										bacterium_NLAE-zl-C482	5.65817	0.874726	1.15812	0.755298	0.45007	0.99403
										Mobiluncus_curtisii	132.541	-0.594219	0.61512	-0.966021	0.334034	0.99403
										Lachnospiraceae_bacterium_DJF_RP14	7.07653	-0.29767	1.02973	-0.289075	0.772524	0.99403
										Bifidobacterium_thermophilum	112.22	-0.177853	0.565895	-0.314285	0.753304	0.99403
										bacterium_ic1395	10.775	0.517859	0.936517	0.552963	0.580289	0.99403
										Ruminococcus_sp_Pei041	2.93895	-1.83317	1.44174	-1.2715	0.203552	0.99403
										Bacteroidetes_bacterium_oral_taxon_274	7.93586	0.949727	1.08908	0.872042	0.383186	0.99403
										Clostridium_sp_Kas203-2	3.28674	0.897434	1.3957	0.643001	0.520224	0.99403
										Lactobacillus_gasseri	989.531	0.27854	1.37966	0.20189	0.840003	0.99403
										Alkaliflexus_imshenetskii	4.60916	1.36576	1.68709	0.809536	0.418207	0.99403
										bacterium_NLAE-zl-G224	2.85827	-1.38495	1.55531	-0.890466	0.373216	0.99403
										bacterium_NLAE-zl-H6	4.32395	0.34232	1.09366	0.313003	0.754278	0.99403
										bacterium_NLAE-zl-H5	5.16172	0.690226	1.05451	0.654545	0.512761	0.99403
										Clostridium_sp_strain_Z6	8.72227	-0.177814	0.939521	-0.18926	0.849889	0.99403
										butyrate-producing_bacterium_PH05YB03	3.40587	-0.700681	1.26646	-0.553257	0.580087	0.99403
										butyrate-producing_bacterium_PH05YB02	4.83425	-0.786738	1.25239	-0.62819	0.529879	0.99403
										Desulfovibrio_sp_oral_taxon_F91	11.577	-1.0039	0.832497	-1.20589	0.227861	0.99403
										Gardnerella_vaginalis	2.73994	-1.37783	1.68115	-0.819576	0.412458	0.99403
										Syntrophobotulus_glycolicus	18.0322	-1.16378	0.718727	-1.61922	0.1054	0.99403
										Sporosarcina_thermotolerans	6.93859	0.528868	0.95904	0.551456	0.581321	0.99403
										bacterium_NLAE-zl-C348	7.26182	-0.327448	0.920184	-0.355851	0.721952	0.99403
										bacterium_NLAE-zl-C349	9.10081	-0.441391	0.88447	-0.499045	0.617748	0.99403
										Alistipes_putredinis	18.1287	-0.268241	1.53596	-0.17464	0.861362	0.99403
										Bacteroides_intestinalis	36.4	-0.493806	1.22071	-0.404524	0.685828	0.99403
										bacterium_NLAE-zl-P611	3.65114	0.418713	1.23335	0.339494	0.734238	0.99403
										bacterium_NLAE-zl-P613	4.79634	0.592717	1.09881	0.539416	0.5896	0.99403
										bacterium_NLAE-zl-P615	3.84009	0.556981	1.1859	0.469669	0.638591	0.99403
										bacterium_NLAE-zl-P616	2.82245	0.286406	1.51904	0.188544	0.85045	0.99403
										Clostridium_nexile	27.1058	-0.204047	0.767161	-0.265977	0.790257	0.99403
										Clostridium_perfringens	80.4684	-1.16513	0.779775	-1.49418	0.135128	0.99403
										Pectinatus_frisingensis	44.9513	-0.889484	1.13336	-0.784823	0.432557	0.99403
										Desulfovibrio_intestinalis	3.28082	-0.514496	1.25325	-0.410529	0.681418	0.99403
										bacterium_NLAE-zl-P555	2.78911	-0.612292	1.32558	-0.461905	0.644149	0.99403
										Bacteroides_ovatus	246.431	-0.207742	0.768587	-0.270291	0.786937	0.99403
										Clostridium_sp_MLG856-1	6.5247	0.904194	0.981863	0.920896	0.357104	0.99403
										Geobacillus_kaustophilus	26.8775	-1.0687	0.90216	-1.1846	0.236174	0.99403
										Clostridium_lactatifermentans	12.6182	-0.431113	0.986422	-0.437047	0.662077	0.99403
										Runella_slithyformis	12.7265	0.277745	1.13386	0.244955	0.806492	0.99403
										Ruminococcus_sp_YE58	7.69571	-0.843989	1.0178	-0.829233	0.406973	0.99403
										Fluviicola_taffensis	17.8324	0.937228	0.968051	0.96816	0.332965	0.99403
										swine_fecal_bacterium_SD-Xyl5	3.46589	-1.64592	1.5575	-1.05677	0.290614	0.99403
										Lachnospiraceae_bacterium_14-2	88.8051	-0.564649	0.70001	-0.806631	0.419879	0.99403
										Acetivibrio_sp_6-13	14.1205	0.198976	0.819345	0.242847	0.808124	0.99403
										Clostridiaceae_bacterium_DJF_VP56	4.50186	-3.03713	1.75866	-1.72696	0.0841744	0.99403
										bacterium_ic1371	5.60372	-1.23333	1.55913	-0.791039	0.428921	0.99403
										Alistipes_finegoldii	8777.86	-0.97578	1.00337	-0.972501	0.330801	0.99403
										rumen_bacterium_NK2A14	4.85922	-0.208611	1.0624	-0.196359	0.844329	0.99403
										Helicobacter_fennelliae	2.81663	2.023	1.87983	1.07616	0.281856	0.99403
										Clostridium_tyrobutyricum	3.2606	-0.256851	1.20581	-0.213011	0.831319	0.99403
										bacterium_NLAE-zl-G68	4.02545	0.238293	1.18198	0.201606	0.840225	0.99403
										Ruminococcus_sp_ID1	29.0416	0.594557	0.721542	0.824009	0.409935	0.99403
										Ruminococcus_sp_ID8	6.35915	-0.963146	1.14423	-0.841739	0.399934	0.99403
										Eubacterium_cylindroides	511.537	-0.779408	0.69718	-1.11794	0.263591	0.99403
										Moryella_indoligenes	44.9062	1.22341	0.993824	1.23101	0.21832	0.99403
										Clostridium_bolteae	26.6971	-0.294487	0.674484	-0.436612	0.662393	0.99403
										Lactobacillus_crispatus	255.317	-0.521717	1.28179	-0.407022	0.683992	0.99403
										Porphyromonadaceae_bacterium_C941	26.2513	1.13485	1.08878	1.04231	0.297268	0.99403
										Bacteroides_faecichinchillae	3.35571	2.36036	1.54911	1.52368	0.127589	0.99403
										Solitalea_canadensis	5.12578	-1.13953	1.47892	-0.770514	0.440995	0.99403
										butyrate-producing_bacterium_SS3/4	1705.94	-0.431121	0.547117	-0.787986	0.430705	0.99403
										bacterium_NLAE-zl-G207	2.94187	0.366678	1.34675	0.272268	0.785416	0.99403
										bacterium_NLAE-zl-G203	3.90974	-0.692762	1.1517	-0.601515	0.547497	0.99403
										bacterium_NLAE-zl-C585	3.46451	-0.939029	1.60895	-0.58363	0.559469	0.99403
										bacterium_NLAE-zl-C582	3.39161	0.241957	1.43874	0.168173	0.866447	0.99403
										bacterium_NLAE-zl-C589	10.7528	0.647483	1.12405	0.576028	0.564596	0.99403
										Oribacterium_sp_oral_taxon_078	9.04107	0.544176	0.854138	0.637105	0.524056	0.99403
										Desulfovibrio_sp_H1	8.67035	-1.03362	0.931848	-1.10922	0.267336	0.99403
										bacterium_NLAE-zl-C362	4.35976	-0.559695	1.1484	-0.487369	0.625997	0.99403
										Treponema_succinifaciens	1722.77	-0.214859	0.678172	-0.316821	0.75138	0.99403
										Ruminococcus_sp_CE2	3.36333	0.59993	1.27621	0.470087	0.638293	0.99403
										Butyrivibrio_sp_4C63C	3.08672	1.55591	1.30082	1.1961	0.231657	0.99403
										butyrate-producing_bacterium_A2-166	3.6293	-0.643544	1.4381	-0.447497	0.654516	0.99403
										Eubacterium_brachy	5.29784	-0.654228	1.16482	-0.561654	0.574352	0.99403
										bacterium_NLAE-zl-P639	3.61637	-0.528183	1.31158	-0.402707	0.687164	0.99403
										bacterium_NLAE-zl-P638	4.47169	0.234778	1.13394	0.207046	0.835974	0.99403
										bacterium_NLAE-zl-P637	3.92217	-0.23662	1.17635	-0.201148	0.840583	0.99403
										Lachnospiraceae_bacterium_canine_oral_taxon_146	3.01124	0.730817	1.42749	0.511961	0.608678	0.99403
										Clostridiaceae_bacterium_37-7-2Cl	5.54693	0.160635	0.99348	0.161689	0.87155	0.99403
										Clostridium_sp_PI-S10-B5A	14.6309	0.698782	0.779204	0.89679	0.369831	0.99403
										Clostridium_sp_CS29	5.1238	0.161438	1.10899	0.145572	0.884259	0.99403
										human_intestinal_firmicute_CO13	3.76027	-0.576585	1.27342	-0.452785	0.650704	0.99403
										Clostridium_xylanolyticum	31.05	0.484404	0.70918	0.683048	0.494577	0.99403
										Ruminococcus_sp_MLG080-3	7.40092	-0.238235	0.955996	-0.249201	0.803205	0.99403
										Clostridium_boliviensis	7.96565	0.849211	1.01785	0.83432	0.404101	0.99403
										Anaerostipes_sp_IE4	15.5082	0.818648	0.772443	1.05982	0.289228	0.99403
										Candidatus_Armantifilum_devescovinae	14.4342	0.315599	1.06281	0.296947	0.766507	0.99403
										Clostridium_sp_ArC5	8.96641	0.513294	0.872434	0.588347	0.5563	0.99403
										Hydrogenoanaerobacterium_saccharovorans	21.8496	-1.79889	1.07456	-1.67407	0.0941166	0.99403
										Clostridiales_bacterium_40-4c	5.59222	-0.297504	1.12845	-0.263639	0.792058	0.99403
										Marvinbryantia_formatexigens	42.4032	0.838137	0.656852	1.27599	0.201959	0.99403
										rumen_bacterium_NK4B32	15.7199	-0.551801	0.723088	-0.763117	0.445393	0.99403
										Clostridium_sp_MLG661	7.29887	-0.437939	0.93274	-0.469519	0.638699	0.99403
										Desulfotomaculum_ruminis	16.1024	0.391664	0.78095	0.501522	0.616004	0.99403
										bacterium_NLAE-zl-C117	4.53521	0.190885	1.07869	0.17696	0.85954	0.99403
										Clostridium_sp_Clone-9	12.9333	0.963133	0.783874	1.22868	0.21919	0.99403
										bacterium_NLAE-zl-C113	2.97699	0.835546	1.35747	0.615518	0.538213	0.99403
										bacterium_NLAE-zl-C111	3.09322	0.776871	1.37414	0.565349	0.571836	0.99403
										Clostridium_sp_Clone-1	10.355	0.288987	0.834399	0.346341	0.729086	0.99403
										Clostridium_sp_Clone-7	16.0949	-0.447174	0.824825	-0.542144	0.587719	0.99403
										Ruminococcus_flavefaciens	211.169	-0.666074	0.85714	-0.777089	0.437106	0.99403
										Clostridium_botulinum	58.404	-0.32124	0.638034	-0.503484	0.614624	0.99403
										Desulfitobacterium_hafniense	52.765	-0.101762	0.589423	-0.172648	0.862928	0.99403
										rumen_bacterium_NK2A35	5.08694	0.417416	1.22656	0.340315	0.733619	0.99403
										Luteolibacter_sp_EBTL01	3.21828	1.13612	1.90596	0.596086	0.551117	0.99403
										Prevotella_denticola	29.9794	1.17766	0.9697	1.21446	0.224573	0.99403
										Lactobacillus_amylolyticus	16.9355	1.35057	1.29424	1.04352	0.296707	0.99403
										Clostridium_phytofermentans	1095.38	0.142662	0.52719	0.270608	0.786693	0.99403
										Clostridium_sp_N6	9.22967	0.273869	0.941668	0.290834	0.771178	0.99403
										swine_fecal_bacterium_RF1A-Cel8	4.78807	0.341628	1.63877	0.208467	0.834865	0.99403
										swine_fecal_bacterium_RF1A-Cel4	2.6806	-3.82599	2.12655	-1.79915	0.0719943	0.99403
										bacterium_NLAE-zl-P571	3.52259	0.565353	1.20444	0.46939	0.638791	0.99403
										bacterium_NLAE-zl-P574	4.25708	0.304588	1.18637	0.25674	0.797379	0.99403
										Lachnospira_pectinoschiza	48.4693	0.923507	0.697625	1.32379	0.185574	0.99403
										Streptococcus_intermedius	6.0027	-0.242395	0.970281	-0.249819	0.802727	0.99403
										Coprococcus_sp_ART55/1	1849.21	-0.217773	0.615679	-0.353712	0.723554	0.99403
										Pasteuria_sp_c1	3.67642	0.315951	1.24712	0.253345	0.800001	0.99403
										swine_fecal_bacterium_RF2B-Cel1	3.9167	-1.01104	1.57465	-0.64207	0.520827	0.99403
										Butyricicoccus_pullicaecorum	7.17168	-0.421061	1.09928	-0.383032	0.701696	0.99403
										Firmicutes_bacterium_M53	6.94798	-1.43095	1.24331	-1.15093	0.249763	0.99403
										bacterium_NLAE-zl-G267	6.15971	1.30563	1.0415	1.25361	0.209985	0.99403
										Clostridiaceae_bacterium_SK061	3.74011	0.704072	1.16126	0.606299	0.544316	0.99403
										Firmicutes_bacterium_VNs44	3.56353	1.25046	1.49832	0.834575	0.403957	0.99403
										Lachnospiraceae_bacterium_KCTC_5925	23.5016	-0.78292	0.673676	-1.16216	0.24517	0.99403
										bacterium_NLAE-zl-C566	10.894	1.47066	1.26847	1.1594	0.246292	0.99403
										bacterium_NLAE-zl-C560	5.6819	0.242057	1.33771	0.180949	0.856408	0.99403
										bacterium_NLAE-zl-C309	6.92125	-0.932135	1.17564	-0.792874	0.427851	0.99403
										Oenococcus_oeni	3.59004	-0.977078	1.46361	-0.667581	0.504401	0.99403
										Bacteroides_vulgatus	7756.02	-1.8404	1.16383	-1.58133	0.113802	0.99403
										Helicobacter_mesocricetorum	3.16356	2.20711	2.14405	1.02941	0.303286	0.99403
										Clostridium_sp_WSC-9-7	7.06072	-0.950025	1.32038	-0.71951	0.471827	0.99403
										Clostridium_kluyveri	174.971	-0.231419	0.616709	-0.375248	0.707476	0.99403
										Clostridium_clariflavum	25.0886	-0.881528	0.679738	-1.29686	0.194678	0.99403
										Faecalibacterium_prausnitzii	3913.83	0.212732	0.565641	0.37609	0.70685	0.99403
										Clostridium_sp_CM-C52	3.16886	-2.41988	2.12762	-1.13737	0.255385	0.99403
										Bacteroidales_bacterium_ph8	8.28476	-1.58108	1.56469	-1.01047	0.312268	0.99403
										Butyricimonas_virosa	11.5935	0.552528	1.11512	0.495486	0.620257	0.99403
										mixed_culture_bacterium_CF_gF3SD01_01	8.60406	1.06247	1.03442	1.02711	0.304368	0.99403
										rumen_bacterium_NK4A521	2.90644	3.11103	1.88089	1.65402	0.0981238	0.99403
										Lactobacillus_kefiranofaciens	171.999	-0.300061	1.14749	-0.261494	0.793712	0.99403
										butyrate-producing_bacterium_M50/1	12.1539	-0.784737	1.14925	-0.682825	0.494718	0.99403
										bacterium_NLAE-zl-P212	4.56372	0.854408	1.23311	0.692889	0.488379	0.99403
										Clostridium_sp_EG1	2.90727	-0.702646	1.51464	-0.463904	0.642717	0.99403
										Eubacterium_uniforme	10.1851	-0.278109	0.826579	-0.336458	0.736526	0.99403
										Parabacteroides_goldsteinii	31.6443	0.49609	1.2127	0.409078	0.682482	0.99403
										bacterium_NLAE-zl-H27	3.60402	0.409155	1.31839	0.310344	0.756299	0.99403
										bacterium_NLAE-zl-H26	14.0705	-1.8711	1.58765	-1.17854	0.238582	0.99403
										bacterium_NLAE-zl-H20	15.4904	-1.99683	1.52433	-1.30997	0.190206	0.99403
										Paenibacillus_polymyxa	65.8554	0.141599	0.608789	0.23259	0.816079	0.99403
										rumen_bacterium_NK4B19	4.0796	0.389053	1.14606	0.33947	0.734255	0.99403
										Eubacterium_hadrum	52.6403	0.672598	0.738362	0.910933	0.362331	0.99403
										bacterium_NLAE-zl-C174	3.26958	-0.432509	1.44411	-0.299499	0.76456	0.99403
										bacterium_TMB39	3.53012	-0.503548	1.28068	-0.393189	0.69418	0.99403
										Campylobacter_jejuni	574.449	-0.637286	0.613241	-1.03921	0.298707	0.99403
										Clostridiaceae_bacterium_OCF_9	14.254	0.134416	0.753842	0.178308	0.858481	0.99403
										Clostridium_beijerinckii	10.5106	-0.380459	0.9926	-0.383296	0.7015	0.99403
										Streptococcus_uberis	7.9598	-0.585231	1.08909	-0.537358	0.59102	0.99403
										Blautia_sp_Ser5	36.8903	0.325087	0.758725	0.428465	0.668313	0.99403
										Barnesiella_viscericola	14.8516	1.31958	1.10822	1.19072	0.233765	0.99403
										Clostridium_algidixylanolyticum	48.2013	0.427987	0.673903	0.635087	0.525372	0.99403
										Staphylococcus_saprophyticus	2.81925	1.78446	1.53422	1.16311	0.244786	0.99403
										bacterium_ic1337	9.3521	0.791445	1.10909	0.713597	0.475476	0.99403
										Lactobacillus_reuteri	45529.1	0.403212	1.29979	0.310213	0.756399	0.99403
										Clostridium_metallolevans	5.89868	-1.85796	1.4725	-1.26177	0.207031	0.99403
										Hespellia_stercorisuis	3.96239	-0.326204	1.40963	-0.231411	0.816995	0.99403
										Bacteroides_rodentium	12.8963	0.603875	1.18701	0.508735	0.610938	0.99403
										bacterium_NLAE-zl-P777	3.05912	0.652494	1.39969	0.466171	0.641093	0.99403
										bacterium_NLAE-zl-P772	5.9722	0.21207	1.02531	0.206834	0.83614	0.99403
										bacterium_NLAE-zl-P770	2.89632	0.661266	1.47132	0.449437	0.653117	0.99403
										Blautia_producta	40.6582	-0.294304	0.644778	-0.456442	0.648072	0.99403
										Bacteroides_chinchillae	55.3912	-1.30712	1.17119	-1.11606	0.264398	0.99403
										Dysgonomonas_capnocytophagoides	5.28463	0.80334	1.18539	0.677701	0.497961	0.99403
										Bacteroides_sp_WA1	11.6251	0.605413	1.32634	0.456455	0.648063	0.99403
										Catonella_morbi	25.0193	0.697094	0.863563	0.80723	0.419534	0.99403
										butyrate-producing_bacterium_L2-7	4.29136	1.57918	1.36114	1.16019	0.245972	0.99403
										Paenibacillus_popilliae	27.3101	-0.174899	0.672721	-0.259988	0.794873	0.99403
										Thermoanaerobacter_wiegelii	13.1843	-1.15318	0.999737	-1.15348	0.248713	0.99403
										bacterium_NLAE-zl-P18	3.25209	0.24128	1.25575	0.192139	0.847633	0.99403
										Clostridium_cellulolyticum	91.5198	-0.503895	0.565671	-0.890791	0.373041	0.99403
										butyrate-producing_bacterium_L2-12	5.71847	0.459093	1.11317	0.41242	0.680032	0.99403
										butyrate-producing_bacterium_L2-10	16.5956	-1.332	0.910905	-1.46228	0.143665	0.99403
										Clostridiales_bacterium_SY8526	13.5599	0.337067	0.800971	0.420823	0.673884	0.99403
										bacterium_NLAE-zl-C548	7.97083	0.260763	0.921822	0.282878	0.777271	0.99403
										bacterium_NLAE-zl-C549	7.19983	0.989404	0.923264	1.07164	0.283883	0.99403
										Enterococcus_hirae	5.06719	-1.45132	1.1209	-1.29479	0.195394	0.99403
										bacterium_NLAE-zl-C543	4.53639	-0.202562	1.16136	-0.174417	0.861538	0.99403
										bacterium_NLAE-zl-C545	6.87355	1.10145	1.02273	1.07698	0.281489	0.99403
										bacterium_mpn-isolate_group_18	4.21971	0.470974	1.15431	0.408012	0.683265	0.99403
										bacterium_mpn-isolate_group_16	3.13855	-0.775149	1.25882	-0.615776	0.538042	0.99403
										Clostridium_piliforme	10.1043	0.429466	0.850361	0.50504	0.613531	0.99403
										Sporobacter_termitidis	62.6286	0.882069	0.880932	1.00129	0.316687	0.99403
										bacterium_ii1264	3.26309	1.32732	1.74026	0.762711	0.445636	0.99403
										bacterium_NLAE-zl-C326	4.02327	0.540688	1.43846	0.37588	0.707006	0.99403
										Lactobacillus_frumenti	3.57031	-0.588219	1.81811	-0.323534	0.746291	0.99403
										Clostridium_cocleatum	9.19923	-0.92758	1.01447	-0.914346	0.360535	0.99403
										rumen_bacterium_NK4B4	20.3628	0.509131	0.727251	0.700076	0.48388	0.99403
										rumen_bacterium_NK4B9	5.51622	0.573906	1.11509	0.514673	0.606782	0.99403
										Clostridium_alkalicellulosi	2.97662	1.31549	1.45668	0.903076	0.366486	0.99403
										rumen_bacterium_NK4A114	3.79568	1.10464	1.3144	0.840413	0.400677	0.99403
										Oribacterium_sp_oral_taxon_372	11.5647	0.619112	0.882649	0.701425	0.483038	0.99403
										Pseudobutyrivibrio_sp_3F24C	3.49559	-0.497137	1.18645	-0.419011	0.675208	0.99403
										Lachnospiraceae_bacterium_oral_taxon_097	7.99336	0.201397	0.986383	0.204177	0.838215	0.99403
										Lachnospiraceae_bacterium_oral_taxon_096	2.73528	0.841793	1.49771	0.562052	0.574081	0.99403
										Pseudobutyrivibrio_sp_4C62C	2.91168	-1.00623	1.48387	-0.678113	0.4977	0.99403
										Parabacteroides_gordonii	15.7306	-0.273247	1.27844	-0.213735	0.830754	0.99403
										Anaerostipes_sp_AIP_183_04	7.38594	0.293174	1.17615	0.249265	0.803156	0.99403
										Lachnospiraceae_bacterium_610	44.2959	-0.165954	0.813935	-0.203892	0.838438	0.99403
										Bacteroides_sp_XB44A	3.23979	-0.787224	1.61348	-0.487904	0.625618	0.99403
										Clostridium_sp_AP81	6.89835	0.44288	0.982226	0.450894	0.652066	0.99403
										bacterium_NLAE-zl-476	8.49643	0.992874	0.930901	1.06657	0.286165	0.99403
										bacterium_NLAE-zl-C153	3.21999	1.02329	1.3569	0.754139	0.450766	0.99403
										bacterium_NLAE-zl-C156	5.99804	0.718267	0.996529	0.720769	0.471051	0.99403
										bacterium_NLAE-zl-H316	3.96325	0.343492	1.33284	0.257714	0.796628	0.99403
										bacterium_NLAE-zl-H317	5.1809	0.526303	1.07513	0.489523	0.624472	0.99403
										Acidithiobacillus_ferrooxidans	4.48105	-0.560656	1.25548	-0.446567	0.655187	0.99403
										[Clostridium]_bifermentans	26.8341	-1.3326	1.2163	-1.09562	0.273246	0.99403
										Prevotella_nigrescens	501.883	0.883165	1.01742	0.868047	0.385369	0.99403
										Anaerotruncus_sp_NML_070203	8.7325	-0.162684	1.02214	-0.159159	0.873543	0.99403
										Ruminococcus_champanellensis	201.537	-0.125874	0.760472	-0.165521	0.868534	0.99403
										bacterium_ic1311	9.47538	-0.169786	0.861085	-0.197176	0.84369	0.99403
										Catonella_sp_canine_oral_taxon_158	5.98791	0.792767	1.09305	0.725279	0.468281	0.99403
										Lachnospiraceae_bacterium_canine_oral_taxon_399	3.15514	0.54595	1.31257	0.415938	0.677455	0.99403
										Helicobacter_equorum	17.3651	2.04585	1.52426	1.3422	0.179532	0.99403
										bacterium_NLAE-zl-P530	2.68843	1.27866	1.53118	0.835079	0.403673	0.99403
										Roseburia_sp_A2-183	177.795	-0.146024	0.586358	-0.249035	0.803333	0.99403
										Blautia_luti	13.4349	-0.433769	0.829957	-0.52264	0.601225	0.99403
										Butyrivibrio_sp_3	5.03774	0.297729	1.0501	0.283524	0.776775	0.99403
										Geobacillus_thermoglucosidasius	5.33762	-1.42477	1.05777	-1.34696	0.177994	0.99403
										bacterium_NLAE-zl-P76	4.59529	-0.408015	1.07629	-0.379095	0.704617	0.99403
										bacterium_NLAE-zl-P77	6.0445	1.17329	1.04115	1.12691	0.25978	0.99403
										Lactobacillus_sp_ASF360	18.5002	2.28555	1.30063	1.75727	0.0788719	0.99403
										bacterium_NLAE-zl-G510	8.38614	1.63436	1.07764	1.51662	0.129364	0.99403
										Oscillibacter_valericigenes	1121.31	0.866834	0.767946	1.12877	0.258995	0.99403
										Candidatus_Arthromitus_sp_SFB-mouse	18.5718	0.351229	0.767418	0.457677	0.647185	0.99403
										Desulfovibrio_sp_NY682	14.8511	-0.267442	0.849993	-0.31464	0.753035	0.99403
										Porphyromonas_cangingivalis	9.02642	0.563443	1.27812	0.440835	0.659332	0.99403
										Thermoanaerobacterium_thermosaccharolyticum	14.1736	-1.01809	0.928288	-1.09674	0.272754	0.99403
										Anaerophaga_sp_TC371	4.93326	1.30099	1.385	0.939344	0.347554	0.99403
										Alistipes_onderdonkii	11.4204	-0.55741	1.56608	-0.355927	0.721895	0.99403
										Candidatus_Portiera_aleyrodidarum	4.76833	-0.175291	1.24709	-0.14056	0.888218	0.99403
										Ruminococcus_sp_YE281	9.65049	-1.45725	0.918499	-1.58656	0.112612	0.99403
										Lachnospiraceae_bacterium_oral_taxon_A17	8.50943	-0.404267	0.90059	-0.448891	0.65351	0.99403
										Vibrio_sp_EJY3	4.16219	-0.883579	1.50384	-0.58755	0.556834	0.99403
										Laceyella_sacchari	3.26054	0.381843	1.4535	0.262706	0.792777	0.99403
										Desulfomonile_tiedjei	5.12511	-2.01682	1.26449	-1.59497	0.110719	0.99403
										butyrate-producing_bacterium_T2-145	38.7197	1.22143	0.70433	1.73418	0.0828868	0.99403
										rumen_bacterium_NK4A179	5.90379	0.401965	0.985927	0.407703	0.683492	0.99403
										Clostridiaceae_bacterium_AN-C16-KBRB	27.1159	0.164127	0.702206	0.23373	0.815194	0.99403
										bacterium_mpn-isolate_group_7	4.72378	-1.35685	1.53552	-0.883647	0.376887	0.99403
										bacterium_mpn-isolate_group_6	3.75648	0.929555	1.80018	0.516368	0.605597	0.99403
										Helicobacter_rodentium	66.3633	-0.79032	1.35803	-0.58196	0.560594	0.99403
										Clostridiales_bacterium_canine_oral_taxon_061	108.729	0.882835	0.679089	1.30003	0.193591	0.99403
										Clostridium_jejuense	16.9278	0.492279	0.797026	0.617645	0.536809	0.99403
										bacterium_NLAE-zl-P255	3.13016	-1.43057	1.65457	-0.864617	0.387249	0.99403
										Eubacterium_limosum	192.326	-0.537982	0.59172	-0.909183	0.363253	0.99403
										Clostridium_sp_Kas107-2	6.76599	0.721112	0.981345	0.73482	0.462449	0.99403
										Clostridiaceae_bacterium_LEMV63	3.61	0.418438	1.28935	0.324534	0.745533	0.99403
										Clostridiaceae_bacterium_NML_061030	11.9729	-0.758683	1.07228	-0.707544	0.479229	0.99403
										bacterium_NLAE-zl-H370	3.00394	0.459629	1.3162	0.349209	0.726933	0.99403
										bacterium_NLAE-zl-H61	10.1092	-0.33559	0.854072	-0.392929	0.694372	0.99403
										bacterium_NLAE-zl-H60	10.1341	-0.99786	0.845833	-1.17974	0.238105	0.99403
										bacterium_NLAE-zl-H63	7.65927	-1.01009	1.00066	-1.00942	0.312771	0.99403
										bacterium_NLAE-zl-H69	5.54859	-0.268612	1.0875	-0.247	0.804908	0.99403
										Burkholderia_cepacia	6.40154	0.910723	1.17583	0.774538	0.438612	0.99403
										Firmicutes_bacterium_SRC01-ECW	100.351	-1.11285	1.19457	-0.931589	0.351549	0.99403
										Phascolarctobacterium_sp_canine_oral_taxon_212	19.6954	-0.885239	1.09593	-0.80775	0.419234	0.99403
										bacterium_NLAE-zl-P885	3.63441	0.534098	1.21913	0.438099	0.661314	0.99403
										Clostridiales_bacterium_canine_oral_taxon_388	5.65275	1.41765	1.07001	1.32489	0.185206	0.99403
										Lachnospiraceae_bacterium_3-1	63.9908	-1.35714	0.78469	-1.72952	0.0837158	0.99403
										Haemophilus_parasuis	2.95655	-2.31103	1.9163	-1.20598	0.227824	0.99403
										Prevotella_bivia	48.8481	0.790813	0.976902	0.809511	0.418221	0.99403
										rumen_bacterium_R-20	3.69911	1.15099	1.3994	0.822486	0.4108	0.99403
										rumen_bacterium_R-21	6.99708	-1.73994	1.03005	-1.68918	0.0911849	0.99403
										Lactonifactor_longoviformis	3.71734	-0.55403	1.23705	-0.447863	0.654252	0.99403
										Ruminococcus_sp_15975	4.268	-0.959562	1.12359	-0.854014	0.393097	0.99403
										Hydrogenoanaerobacterium_sp_YN3	4.51295	-1.4876	1.30883	-1.13659	0.25571	0.99403
										Alistipes_shahii	1898.45	0.635918	0.993578	0.640028	0.522154	0.99403
										Streptococcus_anginosus	2.93509	-0.793039	1.60354	-0.494556	0.620914	0.99403
										Bifidobacterium_pseudocatenulatum	25.3735	-1.0666	0.923717	-1.15469	0.248219	0.99403
										bacterium_NLAE-zl-C509	2.98328	0.577575	1.36817	0.422152	0.672914	0.99403
										Coprococcus_catus	567.818	-0.803968	0.599415	-1.34125	0.179838	0.99403
										Lactobacillus_sp_DJF_SLA41	9.17207	0.335536	1.56354	0.214601	0.830079	0.99403
										Verrucomicrobium_sp_GD	5.88719	1.37129	1.61021	0.851618	0.394426	0.99403
										Paenibacillus_terrae	14.0777	-0.35695	0.768349	-0.464568	0.642241	0.99403
										Lachnospiraceae_bacterium_DJF_CP64	3.60488	0.404386	1.19358	0.338802	0.734759	0.99403
										Caldicellulosiruptor_hydrothermalis	2.8251	2.42731	1.53318	1.58318	0.11338	0.99403
										Desulfovibrionales_bacterium_'ARUP_UnID_293'	9.69301	0.738712	0.881417	0.838096	0.401977	0.99403
										Filifactor_alocis	6.13324	-0.56992	1.07724	-0.529057	0.596766	0.99403
										rumen_bacterium_R-15	9.36929	-1.51768	1.01008	-1.50254	0.132957	0.99403
										Eubacteriaceae_bacterium_PEH_A	15.7005	-0.255477	0.924324	-0.276393	0.782246	0.99403
										Prevotella_ruminicola	251.58	0.870189	0.981416	0.886667	0.375258	0.99403
										Odoribacter_splanchnicus	868.248	0.293971	1.10074	0.267066	0.789418	0.99403
										Cytophaga_hutchinsonii	3.95837	0.722227	1.25619	0.574933	0.565336	0.99403
										Cellulosilyticum_lentocellum	62.3839	0.886163	0.617872	1.43422	0.15151	0.99403
										Lactobacillus_ruminis	43.9974	-1.01557	0.640689	-1.58513	0.112938	0.99403
										Bacteroides_clarus	6.96565	0.235836	1.32525	0.177955	0.858758	0.99403
										Clostridium_celerecrescens	77.786	0.219374	0.584961	0.375023	0.707643	0.99403
										Bacteroides_sp_AR20	2.69397	0.775539	1.58383	0.489661	0.624374	0.99403
										bacterium_NLAE-zl-H350	3.16024	1.15875	1.38101	0.839065	0.401433	0.99403
										bacterium_NLAE-zl-H351	4.76601	0.839526	1.12095	0.748941	0.453893	0.99403
										bacterium_NLAE-zl-H352	4.24578	-1.13047	1.2241	-0.92351	0.355741	0.99403
										Lactobacillus_oris	11.1046	0.397112	1.12997	0.351437	0.72526	0.99403
										Alicyclobacillus_acidocaldarius	11.6315	-0.81175	0.867042	-0.936229	0.349155	0.99403
										bacterium_NLAE-zl-H43	5.14706	-0.707078	1.05611	-0.669509	0.503171	0.99403
										bacterium_NLAE-zl-H41	9.69497	-0.590444	0.865343	-0.682324	0.495034	0.99403
										Leuconostoc_gasicomitatum	5.39433	0.275825	1.18164	0.233427	0.81543	0.99403
										Clostridium_sp_UB-B_2	4.15591	-1.22172	1.29683	-0.942083	0.34615	0.99403
										bacterium_NLAE-zl-C265	5.11465	-0.424942	1.06246	-0.39996	0.689186	0.99403
										bacterium_NLAE-zl-C262	2.8685	0.75298	1.29415	0.581835	0.560678	0.99403
										Clostridium_spiroforme	50.4937	-1.21929	0.89456	-1.36301	0.172881	0.99403
										Campylobacter_coli	357.686	-0.592427	0.622221	-0.952116	0.341038	0.99403
										rumen_bacterium_NK2A1	8.42813	0.517654	0.906062	0.571323	0.567781	0.99403
										bacterium_NLAE-zl-P711	2.96015	0.83135	1.31363	0.632864	0.526822	0.99403
										bacterium_NLAE-zl-H512	4.67437	0.620555	1.10794	0.560098	0.575412	0.99403
										bacterium_NLAE-zl-H519	3.05207	0.773264	1.29735	0.596034	0.551153	0.99403
										Clostridium_sp_XB90	13.8953	0.456593	0.901697	0.506371	0.612596	0.99403
										Phascolarctobacterium_succinatutens	43.8409	-1.01126	1.12553	-0.898471	0.368935	0.99403
										bacterium_ASF500	573.787	0.135993	0.798457	0.17032	0.864759	0.99403
										Streptococcus_pasteurianus	47.1168	0.797245	0.752753	1.05911	0.289552	0.99403
										Exiguobacterium_antarcticum	22.1309	-0.630794	0.740638	-0.85169	0.394386	0.99403
										Desulfovibrio_simplex	11.3926	-0.624244	0.805043	-0.775417	0.438093	0.99403
										Alistipes_indistinctus	3.16255	-1.51933	1.99952	-0.759848	0.447345	0.99403
										Bacillus_anthracis	27.6553	-0.17664	0.702207	-0.251549	0.801389	0.99403
										bacterium_NLAE-zl-C388	8.03982	1.48269	1.12633	1.3164	0.188041	0.99403
										Clostridium_sp_MDA2315	8.4986	-1.48146	1.49836	-0.988719	0.322801	0.99403
										Ruminococcus_sp_	9.62586	0.871052	0.939964	0.926686	0.354089	0.99403
										butyrate-producing_bacterium_YE53	3.3809	-2.1374	1.41704	-1.50835	0.131465	0.99403
										Clostridium_thermocellum	25.085	-0.462216	0.672755	-0.68705	0.492051	0.99403
										bacterium_YJ1	10.6715	1.21599	1.07399	1.13222	0.257542	0.99403
										Clostridiaceae_bacterium_SN021	27.0594	1.16845	0.867973	1.34618	0.178244	0.99403
										Lachnospiraceae_bacterium_canine_oral_taxon_037	13.6574	0.221538	1.00253	0.220978	0.82511	0.99403
										Ruminococcus_bromii	6364.27	-0.869144	0.585631	-1.48412	0.137778	0.99403
										Clostridium_sp_AIP_321_05	4.26784	-0.532727	1.1368	-0.468621	0.63934	0.99403
										Lactobacillus_plantarum	47.8227	-0.657629	0.832821	-0.78964	0.429738	0.99403
										Lactobacillus_sp_oral_taxon_D06	3.96521	0.68949	1.657	0.416108	0.677331	0.99403
										Streptococcus_sanguinis	17.5385	-0.333838	0.847936	-0.393707	0.693797	0.99403
										Flavobacterium_psychrophilum	6.18688	0.276274	1.14393	0.241513	0.809157	0.99403
										Thermoanaerobacter_uzonensis	6.41603	-1.58229	1.07131	-1.47696	0.139686	0.99403
										Bifidobacterium_sp_PG13	3.45672	1.9471	1.8063	1.07795	0.281058	0.99403
										Clostridium_aminovalericum	19.3966	0.604702	0.803985	0.752131	0.451972	0.99403
										bacterium_NLAE-zl-G123	10.4102	0.504011	1.20792	0.417256	0.676491	0.99403
										Porphyromonas_gingivalis	271.352	1.01632	1.01402	1.00226	0.316218	0.99403
										Mitsuokella_multacida	70.7945	-0.110223	0.662883	-0.166278	0.867938	0.99403
										Luteolibacter_algae	4.60505	3.06791	1.76647	1.73674	0.0824326	0.99403
										Lachnobacterium_bovis	6.53283	0.532236	1.01552	0.524103	0.600207	0.99403
										Blautia_sp_M25	22.0667	-0.770353	0.774476	-0.994677	0.319893	0.99403
										Ruminococcus_sp_9SE51	6.72709	1.81668	1.38777	1.30907	0.190512	0.99403
										bacterium_NLAE-zl-P598	2.79944	0.404724	1.30803	0.309415	0.757006	0.99403
										bacterium_NLAE-zl-H533	7.08508	-2.38922	1.4504	-1.64728	0.0995008	0.99403
										butyrate-producing_bacterium_SS2/1	6.25557	2.14684	1.29667	1.65566	0.0977909	0.99403
										Desulfotomaculum_sp_GAL5_S	3.15184	-0.224284	1.23344	-0.181836	0.855712	0.99403
										Symbiobacterium_thermophilum	5.06797	-0.159686	1.08074	-0.147756	0.882535	0.99403
										Veillonella_dispar	17.6729	-0.142008	1.03005	-0.137865	0.890347	0.99403
										Ruminococcus_sp_JC304	9.08079	-1.05842	0.977548	-1.08273	0.278929	0.99403
										butyrate-producing_bacterium_A2-207	11.4876	-0.236261	0.811735	-0.291057	0.771008	0.99403
										Syntrophothermus_lipocalidus	10.8606	-0.513191	0.938207	-0.546992	0.584384	0.99403
										bacterium_NLAE-zl-P94	17.0227	-0.13123	0.783312	-0.167532	0.866952	0.99403
										bacterium_NLAE-zl-P93	21.0418	-0.207267	0.823448	-0.251706	0.801268	0.99403
										bacterium_NLAE-zl-P98	3.58003	-0.30468	1.21871	-0.250002	0.802586	0.99403
										bacterium_NLAE-zl-P99	2.89168	0.336623	1.42048	0.236979	0.812673	0.99403
										Clostridium_sp_Culture-23	55.6433	-0.282405	0.757077	-0.373021	0.709133	0.99403
										Clostridium_sp_Culture-27	11.8573	-0.543712	0.856125	-0.635084	0.525373	0.99403
										Emticicia_oligotrophica	9.32106	-0.630828	1.0379	-0.60779	0.543327	0.99403
										Eubacterium_contortum	58.3523	-0.168988	0.672969	-0.251108	0.80173	0.99403
										human_intestinal_bacterium_julong_601	4.03678	-0.346045	1.16674	-0.29659	0.766779	0.99403
										Carboxydothermus_hydrogenoformans	4.70147	-1.1559	1.31629	-0.878147	0.379864	0.99403
										Klebsiella_pneumoniae	3.29284	-2.05127	1.96957	-1.04148	0.297653	0.99403
										butyrate-producing_bacterium_Ph07AW01	3.19273	1.4605	1.46102	0.999644	0.317483	0.99403
										Flexibacter_flexilis	3.22736	-1.08977	1.60577	-0.67866	0.497353	0.99403
										Clostridium_methoxybenzovorans	3.3197	0.681715	1.3615	0.500709	0.616576	0.99403
										Thermaerobacter_marianensis	5.10879	0.92044	1.14446	0.804256	0.421249	0.99403
										Ruminococcus_sp_DJF_VR67	13.8373	-1.01129	0.834629	-1.21166	0.225643	0.99403
										Ruminococcus_sp_5	5.26475	1.06144	1.2657	0.838617	0.401684	0.99403
										Shuttleworthia_satelles	62.1665	-0.24196	0.582531	-0.415359	0.677879	0.99403
										Thermoanaerobacter_brockii	7.11283	-1.5685	1.07535	-1.4586	0.144676	0.99403
										bacterium_NLAE-zl-C97	4.15052	-1.3983	1.28594	-1.08737	0.276871	0.99403
										Parabacteroides_sp_NS31-3	3.01816	-1.78546	1.86484	-0.957433	0.338349	0.99403
										Candidatus_Arthromitus_sp_SFB-rat-Yit	6.14174	-0.877777	1.15221	-0.761824	0.446165	0.99403
										[Clostridium]_ghonii	9.08613	-1.50079	1.40592	-1.06748	0.285753	0.99403
										Eubacteriaceae_bacterium_NML_070849	3.09154	-1.04771	1.43481	-0.730212	0.465261	0.99403
										Sporomusa_acidovorans	3.37888	0.509567	1.59813	0.318851	0.749839	0.99403
										bacterium_NLAE-zl-P107	11.1712	-2.27344	1.28318	-1.77173	0.0764398	0.99403
										bacterium_NLAE-zl-P106	3.04051	0.767794	1.27904	0.600291	0.548313	0.99403
										bacterium_NLAE-zl-P101	2.96355	0.278243	1.30874	0.212604	0.831636	0.99403
										bacterium_NLAE-zl-P100	3.51452	-0.82327	1.23704	-0.665515	0.505721	0.99403
										bacterium_NLAE-zl-P103	9.27982	-1.15006	1.2544	-0.916822	0.359236	0.99403
										Clostridium_sp_AL04-11	4.2429	-1.1894	1.53205	-0.776349	0.437543	0.99403
										Clostridium_lavalense	27.7715	0.344448	0.972338	0.354247	0.723154	0.99403
										bacterium_NLAE-zl-P416	3.04823	-0.288396	1.55691	-0.185235	0.853044	0.99403
										bacterium_NLAE-zl-G452	3.0438	1.76643	1.44781	1.22007	0.22244	0.99403
										bacterium_NLAE-zl-G101	3.647	0.766577	1.20028	0.638666	0.52304	0.99403
										Blautia_sp_CMP-C5-0	5.84188	0.524019	1.04546	0.50123	0.616209	0.99403
										Clostridium_sp_ID3	8.54864	-0.145153	0.954007	-0.152151	0.879068	0.99403
										Clostridium_sp_ID6	5.92975	-0.893442	1.02153	-0.87461	0.381786	0.99403
										Clostridium_sp_ID5	12.0279	0.344561	0.812498	0.424076	0.67151	0.99403
										bacterium_NLAE-zl-C228	3.29944	-1.14038	1.50648	-0.756985	0.449059	0.99403
										bacterium_NLAE-zl-C227	5.24108	1.86749	1.13788	1.64119	0.100757	0.99403
										bacterium_NLAE-zl-P822	5.31731	-1.45475	1.51131	-0.962574	0.335762	0.99403
										Clostridium_sp_CITR8	7.26509	-0.494244	0.990354	-0.499058	0.617739	0.99403
										Clostridiales_genomosp_BVAB3	10.2073	-0.25565	0.832985	-0.306909	0.758913	0.99403
										Parabacteroides_sp_DJF_B086	13.8367	-2.76015	1.55302	-1.77728	0.0755217	0.99403
										Butyrivibrio_crossotus	109.372	0.32579	0.777357	0.4191	0.675143	0.99403
										Blautia_sp_BM-C4-0	5.11793	0.748497	1.06359	0.703747	0.48159	0.99403
										bacterium_NLAE-zl-H538	8.01462	0.232799	0.904318	0.257431	0.796846	0.99403
										Desulfovibrio_fairfieldensis	5.06268	-1.45291	1.24534	-1.16667	0.243344	0.99403
										Prevotella_brevis	2.89245	1.64432	1.51742	1.08363	0.278527	0.99403
										Johnsonella_ignava	3.7409	-0.164787	1.18422	-0.139152	0.88933	0.99403
										Lachnoanaerobaculum_umeaense	3.70708	-0.228978	1.1945	-0.191694	0.847982	0.99403
										Clostridium_sp_Culture-41	46.2391	0.839557	0.714355	1.17527	0.239889	0.99403
										rumen_bacterium_NK4A76	2.88997	1.82447	1.37549	1.32641	0.184703	0.99403
										Trueperella_pyogenes	742.376	0.174809	0.620503	0.281721	0.778158	0.99403
										butyrate-producing_bacterium_L1-93	12.5395	-0.385242	0.930738	-0.41391	0.67894	0.99403
										Clostridium_oroticum	72.432	-0.337955	0.623912	-0.54167	0.588046	0.99403
										Porphyromonas_gulae	18.4242	0.734538	0.938997	0.782258	0.434063	0.99403
										Clostridium_sp_L1C	19.4167	0.311113	0.886726	0.350855	0.725697	0.99403
										Blautia_sp_BS-C5-2	4.77413	0.176104	1.1274	0.156204	0.875872	0.99403
										Heliobacterium_modesticaldum	5.72995	-0.401924	1.00118	-0.401453	0.688087	0.99403
										Clostridium_methylpentosum	7.14098	0.195105	0.976522	0.199795	0.841641	0.99403
										bacterium_YE59	3.16541	0.431694	1.28209	0.336711	0.736335	0.99403
										Acetanaerobacterium_elongatum	5.4945	0.186405	1.17213	0.15903	0.873645	0.99403
										Clostridium_sp_CM-C99	3.44665	0.438486	1.47491	0.297296	0.76624	0.99403
										Lactobacillus_rhamnosus	45.5385	-0.802199	0.707983	-1.13308	0.257182	0.99403
										Coprococcus_eutactus	20.2145	0.786087	1.01459	0.77478	0.43847	0.99403
										Flavonifractor_plautii	1310.8	0.226278	0.775059	0.29195	0.770325	0.99403
										Alistipes_sp_DJF_B185	5.90574	-0.306757	1.6475	-0.186195	0.852292	0.99403
										Clostridium_acetobutylicum	22.9775	-0.666535	0.738812	-0.902172	0.366966	0.99403
										Clostridium_sp_2ER371_1	18.9507	-1.75258	1.15325	-1.5197	0.128587	0.99403
										bacterium_NLAE-zl-G471	5.51451	1.35292	1.24717	1.08479	0.278013	0.99403
										Clostridium_sp_K12	2.90029	0.205565	1.4249	0.144266	0.885291	0.99403
										Clostridium_sp_K10	4.66818	0.702008	1.16744	0.601325	0.547624	0.99403
										bacterium_NLAE-zl-G479	8.47221	1.78627	1.03637	1.72358	0.0847835	0.99403
										butyrate-producing_bacterium_SL6/1/1	3.12466	-0.619376	1.39906	-0.44271	0.657976	0.99403
										Porphyromonas_cansulci	4.93381	1.77952	1.32722	1.34079	0.17999	0.99403
										swine_fecal_bacterium_RF3E-Xyl1	3.61178	1.69649	1.44026	1.1779	0.238837	0.99403
										butyrate-producing_bacterium_SM4/1	1112.37	-0.471251	0.560722	-0.840436	0.400664	0.99403
										butyrate-producing_bacterium_P607	6.13002	-0.958236	1.11209	-0.86165	0.38888	0.99403
										Clostridium_sulfidigenes	6.81125	0.815446	1.08769	0.749702	0.453434	0.99403
										Clostridium_cellulosi	3.59987	-1.02736	1.27943	-0.802982	0.421985	0.99403
										Helicobacter_cetorum	12.4645	0.874407	1.66439	0.525363	0.599331	0.99403
										Clostridium_sp_NkU-1	5.32032	1.35823	1.27664	1.06391	0.287368	0.99403
										bacterium_AUH-Julong64	6.12569	-0.346977	1.26445	-0.27441	0.78377	0.99403
										Peptostreptococcus_anaerobius	3.8657	-2.37513	1.59166	-1.49224	0.135637	0.99403
										Paenibacillus_mucilaginosus	44.8278	-0.534673	0.591358	-0.904143	0.365919	0.99403
										Saccharofermentans_acetigenes	10.2295	-0.231192	0.830752	-0.278293	0.780788	0.99403
										Ruminococcus_gauvreauii	18.4475	-0.642591	0.841556	-0.763575	0.445121	0.99403
										Lactobacillus_hamsteri	2.78568	1.97588	1.95561	1.01036	0.31232	0.99403
										Cyclobacterium_marinum	9.63839	0.171754	1.22502	0.140205	0.888498	0.99403
										Clostridiales_bacterium_canine_oral_taxon_219	30.2675	1.37962	0.770877	1.78968	0.0735058	0.99403
										Clostridiaceae_bacterium_SK082	7.83576	0.223849	0.960147	0.233141	0.815652	0.99403
										Clostridium_sp_Cd6	4.16323	0.428105	1.18613	0.360926	0.718155	0.99403
										Clostridium_fimetarium	9.9928	-0.315751	0.921408	-0.342683	0.731837	0.99403
										Clostridiaceae_bacterium_T2-RPP	149.746	1.17008	1.34765	0.868237	0.385264	0.99403
										Bacillus_thuringiensis	29.3373	-0.407768	0.636039	-0.641105	0.521455	0.99403
										Clostridiaceae_bacterium_FH052	12.7787	0.447016	0.887527	0.503664	0.614498	0.99403
										Streptococcus_pneumoniae	237.351	-0.501824	0.569855	-0.880617	0.378525	0.99403
										Clostridiaceae_bacterium_K10	335.523	-1.0342	0.727432	-1.42172	0.155108	0.99403
										rumen_bacterium_NK4C38	5.59428	1.10275	1.13449	0.972022	0.33104	0.99403
										Pediococcus_pentosaceus	9.73425	-0.40006	0.884299	-0.452403	0.650978	0.99403
										Firmicutes_bacterium_DJF_VP44	83.9115	0.204953	0.746297	0.274627	0.783603	0.99403
										Clostridium_sp_WSC-9-B	7.65684	-0.334385	1.00105	-0.334032	0.738355	0.99403
										[Eubacterium]_nodatum	3.42916	-2.02657	1.49935	-1.35164	0.176491	0.99403
										Blautia_sp_YHC-4	12.9182	-0.986035	1.0193	-0.967369	0.33336	0.99403
										Clostridium_sp_CCRI-9842	5.40375	0.235073	1.03433	0.22727	0.820214	0.99403
										Clostridium_caenicola	3.56699	1.9034	1.48224	1.28414	0.199094	0.99403
										Peptococcus_niger	15.2427	0.395009	0.815674	0.484273	0.628192	0.99403
										bacterium_NLAE-zl-C52	12.0488	1.13565	1.20285	0.944128	0.345104	0.99403
										bacterium_NLAE-zl-C51	4.15698	-0.451073	1.12778	-0.399964	0.689183	0.99403
										bacterium_NLAE-zl-C50	8.30805	1.08967	1.21169	0.899298	0.368494	0.99403
										bacterium_NLAE-zl-P144	4.08238	0.693553	1.20929	0.573519	0.566294	0.99403
										Streptococcus_parauberis	7.99663	-1.88697	1.04751	-1.80139	0.0716411	0.99403
										Clostridiales_bacterium_AP2	2.87129	0.62734	1.33477	0.469999	0.638356	0.99403
										Porphyromonas_canoris	3.96478	0.585998	1.52796	0.383516	0.701337	0.99403
										TM7_phylum_sp_oral_taxon_351	3.02534	0.453007	1.61708	0.280139	0.779371	0.99403
										Roseburia_sp_DJF_VR77	4.45271	-0.379636	1.16546	-0.32574	0.744621	0.99403
										Clostridium_sp_CYP2	7.31135	0.591994	1.15651	0.511879	0.608736	0.99403
										Desulfovibrio_desulfuricans	387.285	-0.647276	0.57614	-1.12347	0.261238	0.99403
										rumen_bacterium_NK4A222	20.2909	-0.865543	1.083	-0.799211	0.424168	0.99403
										bacterium_NLAE-zl-G412	4.57426	0.499013	1.17621	0.424256	0.671379	0.99403
										Bifidobacterium_adolescentis	12.8684	-1.24059	0.873505	-1.42025	0.155536	0.99403
										bacterium_NLAE-zl-G410	6.85499	0.690543	0.960806	0.718712	0.472318	0.99403
										bacterium_NLAE-zl-G411	12.7341	0.234492	0.849436	0.276057	0.782504	0.99403
										bacterium_NLAE-zl-G417	6.07191	0.214257	1.08089	0.198224	0.84287	0.99403
										Pelotomaculum_thermopropionicum	3.59573	-0.405583	1.36455	-0.297229	0.766292	0.99403
										Clostridium_sp_MK12	5.64241	1.2831	1.0888	1.17846	0.238614	0.99403
										Clostridium_sp_MK11	5.93427	0.335183	1.09398	0.306389	0.759309	0.99403
										Lachnospiraceae_bacterium_oral_taxon_419	63.4138	0.427983	0.630394	0.678913	0.497193	0.99403
										Defluviitalea_saccharophila	6.85465	0.154917	1.00553	0.154065	0.877559	0.99403
										bacterium_NLAE-zl-C2	2.78853	1.92325	1.46355	1.3141	0.188812	0.99403
										Candidatus_Glomeribacter_gigasporarum	5.26132	-0.995387	1.30105	-0.765065	0.444233	0.99403
										Clostridium_cellulovorans	104.691	-0.500419	0.630812	-0.793293	0.427607	0.99403
										unidentified_eubacterium_clone_BSV51	5.67483	0.375251	1.02953	0.364487	0.715494	0.99403
										Clostridium_sp_Clone-17	35.6406	0.648171	0.699242	0.926963	0.353946	0.99403
										Clostridium_sp_Clone-16	18.6785	0.635126	0.855768	0.74217	0.457984	0.99403
										Butyrivibrio_fibrisolvens	160.486	0.158994	0.613032	0.259356	0.795361	0.99403
										Staphylococcus_carnosus	2.70371	-0.307562	1.4277	-0.215425	0.829436	0.99403
										Clostridium_sp_PPf35L1	2.83088	-2.14872	1.8219	-1.17939	0.238244	0.99403
										Clostridiales_bacterium_CIEAF_029	28.2285	0.141359	0.638732	0.221312	0.82485	0.99403
										Geobacter_sulfurreducens	14.8538	-0.678642	0.916918	-0.740133	0.459219	0.99403
										Clostridiales_bacterium_CIEAF_026	406.088	0.114626	0.806623	0.142106	0.886997	0.99403
										Clostridiales_bacterium_CIEAF_020	63.0874	0.819623	0.716176	1.14444	0.25244	0.99403
										Clostridiales_bacterium_CIEAF_022	146.031	0.235152	0.783783	0.300022	0.76416	0.99403
										Catonella_sp_CM100	5.71372	0.758194	0.995495	0.761625	0.446284	0.99403
										Clostridiales_bacterium_7-4c	20.8555	-0.482008	0.839645	-0.574061	0.565926	0.99403
										bacterium_NLAE-zl-P686	4.48924	0.247422	1.09873	0.225188	0.821833	0.99403
										bacterium_NLAE-zl-P684	5.28714	0.662715	1.08153	0.612757	0.540037	0.99403
										Lactobacillus_helveticus	655.519	-0.793373	1.06184	-0.747165	0.454964	0.99403
										Ruminococcus_callidus	4.02236	-1.08027	1.20842	-0.893952	0.371348	0.99403
										Phascolarctobacterium_sp_canine_oral_taxon_149	15.5802	-1.16168	0.900232	-1.29043	0.196903	0.99403
										Roseburia_inulinivorans	62.5044	-0.575148	0.96175	-0.598022	0.549825	0.99403
										Desulfovibrio_vulgaris	152.718	-0.702808	0.700567	-1.0032	0.315765	0.99403
										Veillonellaceae_bacterium_canine_oral_taxon_211	2.72482	-2.98113	1.79342	-1.66226	0.0964611	0.99403
										bacterium_NLAE-zl-H483	3.7138	0.363753	1.19794	0.30365	0.761395	0.99403
										Lactobacillus_amylovorus	376.528	-0.794459	1.14003	-0.696878	0.485879	0.99403
										Magnetococcus_marinus	6.56747	0.311655	1.08945	0.286066	0.774828	0.99403
										rumen_bacterium_NK4A32	3.37328	0.704482	1.3456	0.523544	0.600596	0.99403
										Clostridium_amygdalinum	6.5519	0.461931	1.06158	0.435135	0.663465	0.99403
										Bacteroidetes_bacterium_Smarlab_3301186	6.63201	0.653542	1.09478	0.596964	0.550532	0.99403
										Clostridium_sp_Culture_Jar-17	11.4803	-1.43631	0.923101	-1.55596	0.119717	0.99403
										Clostridium_sp_Culture_Jar-15	4.21756	0.209423	1.30247	0.160789	0.87226	0.99403
										Lachnospiraceae_bacterium_ICM7	3.54243	-0.316034	1.22535	-0.257914	0.796473	0.99403
										Oscillospiraceae_bacterium_NML_061048	60.6006	0.888291	0.858906	1.03421	0.301037	0.99403
										Clostridium_sp_Culture_Jar-19	9.32919	0.301448	0.898681	0.335434	0.737297	0.99403
										bacterium_NLAE-zl-C30	4.56905	-0.167099	1.08038	-0.154667	0.877084	0.99403
										bacterium_NLAE-zl-C38	3.49054	0.181754	1.19883	0.151609	0.879495	0.99403
										butyrate-producing_bacterium_PH07BW09	6.36768	-0.399417	0.98866	-0.403999	0.686214	0.99403
										Mycoplasma_putrefaciens	3.88801	0.18564	1.27032	0.146136	0.883814	0.99403
										rumen_bacterium_NK4A202	4.80605	1.25495	1.15602	1.08557	0.277667	0.99403
										rumen_bacterium_NK2B18	18.6824	-0.525338	1.09462	-0.479927	0.631279	0.99403
										Erysipelotrichaceae_bacterium_canine_oral_taxon_311	2.7769	-0.751597	1.48264	-0.506933	0.612202	0.99403
										unidentified_eubacterium_clone_BSV70	2.78647	-0.502055	1.35807	-0.369684	0.711618	0.99403
										Clostridium_sp_Clone-30	11.1234	0.281756	0.820317	0.343472	0.731244	0.99403
										Clostridium_sp_Clone-33	29.4148	-0.306857	0.761587	-0.402918	0.687008	0.99403
										Lactobacillales_bacterium_HY-36-1	73.4128	1.19111	0.929424	1.28156	0.199997	0.99403
										Clostridium_acidurici	5.48661	-0.93732	1.10086	-0.851441	0.394525	0.99403
										Lactobacillus_intestinalis	174.719	1.97674	1.30109	1.51929	0.12869	0.99403
										Clostridium_sp_IrT-JG1-67	3.51539	0.92183	1.21315	0.759862	0.447337	0.99403
										Roseburia_faecis	64.3364	-0.68504	0.889423	-0.770207	0.441177	0.99403
										Paenibacillus_sp_JDR-2	7.75209	0.235643	0.923466	0.255172	0.79859	0.99403
										Pseudobutyrivibrio_xylanivorans	10.3886	0.676947	0.953448	0.709999	0.477705	0.99403
										Pseudobutyrivibrio_sp_3C20C	2.75222	-0.627338	1.55309	-0.40393	0.686264	0.99403
										Parabacteroides_sp_dnLKV18	3.42537	1.27282	1.60448	0.793292	0.427608	0.99403
										intestinal_bacterium_CG19-1	14.2216	-0.752955	0.792771	-0.949776	0.342226	0.99403
										Ruminococcus_sp_16442	10.209	-0.575349	0.842362	-0.683019	0.494595	0.99403
										Clostridium_herbivorans	5.05767	0.365054	1.33696	0.273048	0.784816	0.99403
										bacterium_YE273	16.1937	-0.427308	0.736241	-0.580392	0.56165	0.99403
										Clostridiales_bacterium_canine_oral_taxon_259	4.27921	1.99009	1.85186	1.07464	0.282536	0.99403
										Clostridium_sp_14774	13.8605	-1.49357	1.12156	-1.33169	0.182962	0.99403
										Thermosyntropha_sp_L-60	3.48654	-1.01819	1.23668	-0.823327	0.410322	0.99403
										Butyrivibrio_sp_	3.19563	-0.559986	1.29404	-0.432744	0.665201	0.99403
										Ruminococcus_sp_END-1	7.72422	1.14352	0.993361	1.15117	0.249664	0.99403
										bacterium_NLAE-zl-H176	9.5743	0.440608	0.957711	0.460064	0.645471	0.99403
										Bacillus_pumilus	6.18691	-0.780047	0.981412	-0.794822	0.426717	0.99403
										Clostridium_sp_JB-2	2.73015	-0.886323	1.66776	-0.531447	0.595109	0.99403
										bacterium_NLAE-zl-C185	4.51714	0.820345	1.19081	0.688897	0.490888	0.99403
										Bacteroides_heparinolyticus	4.58016	1.48868	1.3277	1.12125	0.262182	0.99403
										Phascolarctobacterium_faecium	394.503	-1.13869	1.15395	-0.98678	0.32375	0.99403
										Porphyromonas_sp_oral_taxon_279	3.86646	0.770265	1.48924	0.517222	0.605001	0.99403
										bacterium_NLAE-zl-C14	5.91325	-0.289185	1.08234	-0.267186	0.789326	0.99403
										Clostridiales_bacterium_canine_oral_taxon_085	20.6495	0.360941	0.888328	0.406315	0.684511	0.99403
										Peptococcus_sp_oral_taxon_167	5.47514	-0.556441	1.12503	-0.4946	0.620882	0.99403
										Lachnospiraceae_bacterium_canine_oral_taxon_099	8.12304	-1.21696	1.16417	-1.04535	0.295862	0.99403
										[Clostridium]_irregulare	28.353	-1.61151	1.19833	-1.3448	0.178691	0.99403
										Bacteroides_sp_CR-34	2.99686	1.33229	1.6013	0.832008	0.405404	0.99403
										bacterium_NLAE-zl-c593	4.41891	0.865431	1.47203	0.587916	0.556588	0.99403
										Lachnospiraceae_bacterium_3F21C	3.57553	1.12701	1.36556	0.825313	0.409194	0.99403
										Lachnospiraceae_bacterium_oral_taxon_455	3.14311	-1.44145	1.47129	-0.979718	0.327225	0.99403
										Luteolibacter_sp_E100	5.72239	2.84636	1.58433	1.79657	0.0724037	0.99403
										Pseudobutyrivibrio_ruminis	23.9133	-0.243382	0.680279	-0.357768	0.720517	0.99403
										Clostridiales_bacterium_JN18_V41_S	7.0434	-0.848197	1.08933	-0.77864	0.436192	0.99403
										Lactobacillus_kitasatonis	11.3356	-1.3147	1.29819	-1.01272	0.311195	0.99403
										Staphylococcus_haemolyticus	2.67433	-0.482691	1.36732	-0.35302	0.724074	0.99403
										Clostridiaceae_bacterium_SH032	5.93878	-0.622676	1.09989	-0.566129	0.571306	0.99403
										Clostridium_sp_6-62	7.54455	-1.86808	1.47325	-1.268	0.204799	0.99403
										Clostridium_sp_6-69	3.58291	-1.18545	1.58004	-0.750263	0.453096	0.99403
										Helcococcus_sp_canine_oral_taxon_069	15.7023	0.960061	0.803309	1.19513	0.232035	0.99403
										Streptococcus_agalactiae	71.7818	-0.586383	0.716298	-0.81863	0.412997	0.99403
										Lactobacillus_sp_ID9203	8.20866	0.861197	1.57249	0.547666	0.583921	0.99403
										Porphyromonas_endodontalis	9.04059	0.409193	1.07619	0.380223	0.70378	0.99403
										Lachnospiraceae_bacterium_oral_taxon_F15	112.076	0.631253	0.802262	0.786842	0.431374	0.99403
										Clostridium_mayombei	11.5742	-2.35971	1.3009	-1.81391	0.0696913	0.99403
										Catonella_sp_oral_taxon_164	5.85746	-0.186159	1.01928	-0.182637	0.855083	0.99403
										bacterium_YE257	20.5022	-0.262801	0.722571	-0.363703	0.71608	0.99403
										Catonella_sp_canine_oral_taxon_048	3.39925	-0.47931	1.26814	-0.377962	0.705459	0.99403
										Streptococcus_gordonii	6.85638	-0.732452	0.982606	-0.745417	0.456019	0.99403
										bacterium_NLAE-zl-P644	3.46068	0.773671	1.37076	0.564412	0.572474	0.99403
										bacterium_NLAE-zl-P642	4.48702	0.616188	1.15121	0.535254	0.592474	0.99403
										bacterium_NLAE-zl-P640	3.88222	0.91792	1.19398	0.768793	0.442016	0.99403
										Ruminococcus_albus	170.656	-0.613061	0.553762	-1.10709	0.268257	0.99403
										Bacteroides_sp_dnLKV3	9.82263	-1.343	1.48283	-0.905696	0.365097	0.99403
										Bacteroides_helcogenes	493.199	-0.710864	1.04258	-0.681834	0.495344	0.99403
										bacterium_NLAE-zl-P390	4.32965	0.422489	1.12628	0.375121	0.707571	0.99403
										Tannerella_forsythia	706.794	1.05793	0.998238	1.0598	0.289235	0.99403
										Clostridiales_bacterium_oral_taxon_F32	17.6202	1.71524	1.34023	1.27981	0.200613	0.99403
										Lactobacillus_sp_20326H4L1	6.0393	1.15315	1.487	0.775485	0.438053	0.99403
										[Eubacterium]_minutum	3.42916	-2.02657	1.49935	-1.35164	0.176491	0.99403
										Porphyromonas_asaccharolytica	79.0827	0.464898	1.09279	0.425424	0.670528	0.99403
										Oribacterium_sinus	51.6075	0.434313	0.671714	0.646574	0.517908	0.99403
										Clostridium_sp_Culture_Jar-56	5.44065	0.43384	1.13523	0.382162	0.702342	0.99403
										Clostridium_butyricum	77.7745	-1.21998	0.669353	-1.82262	0.068361	0.99403
										Oribacterium_sp_oral_taxon_108	21.6223	0.734588	0.730262	1.00592	0.314452	0.99403
										rumen_bacterium_NK3B85	6.81392	1.34995	1.01442	1.33077	0.183265	0.99403
										rumen_bacterium_NK3B81	6.02009	0.944949	0.980282	0.963957	0.335068	0.99403
										Gordonibacter_pamelaeae	7.47067	-0.123233	0.908575	-0.135633	0.892111	0.994645
										Clostridium_sp_cTPY-12	86.9855	-0.0987599	0.742917	-0.132935	0.894244	0.994919
										rumen_bacterium_NK4C121	3.31152	0.171673	1.29114	0.132962	0.894223	0.994919
										Anaerostipes_sp_5_1_63FAA	15.5696	0.119153	0.886915	0.134345	0.89313	0.994919
										Desulfosporosinus_orientis	10.1839	0.125506	0.949247	0.132216	0.894813	0.994919
										bacterium_NLAE-zl-P314	3.14919	0.185379	1.41484	0.131025	0.895756	0.995036
										Clostridium_sp_K11	5.83106	0.139984	1.07243	0.13053	0.896147	0.995036
										Desulfovibrio_sp_LNB1	4.4484	-0.162363	1.25152	-0.129733	0.896778	0.995055
										Bifidobacterium_sp_ISO3519	8.85513	0.127923	0.998215	0.128152	0.898029	0.995131
										swine_fecal_bacterium_RF1A-Pec5	4.90899	0.215279	1.68064	0.128094	0.898075	0.995131
										Thermoanaerobacter_pseudethanolicus	11.5453	-0.104347	0.821749	-0.126982	0.898955	0.995425
										Lactobacillus_sp_AbxANB4	2.89277	0.251585	2.05751	0.122276	0.90268	0.996352
										Bacteroides_plebeius	4.47806	0.182467	1.49496	0.122054	0.902856	0.996352
										bacterium_NLAE-zl-G298	3.12914	0.185495	1.48775	0.124681	0.900776	0.996352
										rumen_bacterium_NK4A65	7.8069	-0.121794	0.980611	-0.124202	0.901155	0.996352
										[Clostridium]_difficile	4129.94	-0.0643655	0.530787	-0.121264	0.903482	0.996352
										bacterium_YE57	11.7279	-0.115617	0.947749	-0.121991	0.902906	0.996352
										bacterium_NLAE-zl-P626	4.27494	0.113234	1.14291	0.0990753	0.921078	0.996763
										Lachnospiraceae_bacterium_canine_oral_taxon_156	5.83178	0.125329	1.10426	0.113497	0.909637	0.996763
										butyrate-producing_bacterium_ART55/1	6.63387	0.105109	0.946941	0.110999	0.911617	0.996763
										bacterium_NLAE-zl-C590	9.35185	0.132556	1.15492	0.114775	0.908623	0.996763
										bacterium_NLAE-zl-C279	7.43185	-0.114614	0.987179	-0.116103	0.907571	0.996763
										butyrate-producing_bacterium_PH05YA09	6.16165	-0.10676	0.982719	-0.108637	0.91349	0.996763
										Lachnospiraceae_bacterium_canine_oral_taxon_024	6.17627	-0.0957691	0.965223	-0.0992197	0.920964	0.996763
										bacterium_NLAE-zl-P701	3.34611	-0.144672	1.30393	-0.110951	0.911655	0.996763
										Actinoplanes_missouriensis	3.40447	0.130702	1.21918	0.107205	0.914627	0.996763
										Clostridium_sp_Iso-W7	3.56013	0.162535	1.41345	0.114991	0.908452	0.996763
										Clostridiales_bacterium_CIEAF_012	12.2317	-0.0890207	0.896234	-0.0993275	0.920878	0.996763
										Pasteuria_penetrans	2.69477	-0.144135	1.42846	-0.100902	0.919628	0.996763
										butyrate-producing_bacterium_GM2/1	4.2915	-0.123943	1.20282	-0.103043	0.917929	0.996763
										Lachnospiraceae_bacterium_A4	40.7706	0.0607895	0.605181	0.100448	0.919988	0.996763
										bacterium_NLAE-zl-P513	2.99402	0.165227	1.49459	0.11055	0.911973	0.996763
										bacterium_NLAE-zl-C542	3.11608	0.13812	1.26524	0.109165	0.913071	0.996763
										Desulfovibrio_sp_	2.9333	-0.146744	1.47685	-0.0993629	0.92085	0.996763
										bacterium_NLAE-zl-C520	4.14289	0.155697	1.41185	0.110279	0.912188	0.996763
										bacterium_NLAE-zl-H64	8.31156	-0.103191	0.896887	-0.115054	0.908402	0.996763
										bacterium_NLAE-zl-G166	2.70649	0.160527	1.43227	0.112079	0.910761	0.996763
										Blautia_sp_A-C3-0	4.42263	0.116603	1.13614	0.102631	0.918256	0.996763
										bacterium_NLAE-zl-P90	3.70121	0.1348	1.16743	0.115468	0.908075	0.996763
										Bacillus_pseudofirmus	4.50199	-0.122586	1.15234	-0.10638	0.915281	0.996763
										Clostridium_sp_K19	4.47636	0.127072	1.18187	0.107518	0.914378	0.996763
										bacterium_NLAE-zl-C39	2.66905	-0.153734	1.47281	-0.104382	0.916866	0.996763
										bacterium_NLAE-zl-P408	2.98332	0.142683	1.38488	0.10303	0.917939	0.996763
										rumen_bacterium_8/94-32	6.38113	0.13444	1.2275	0.109523	0.912788	0.996763
										Streptococcus_sp_GDLAMI-SD2	2.81848	0.134711	1.35975	0.0990703	0.921082	0.996763
										bacterium_NLAE-zl-P726	2.67079	-0.1494	1.52852	-0.0977414	0.922138	0.997238
										bacterium_NLAE-zl-C282	4.42043	0.102082	1.0972	0.0930382	0.925873	0.997838
										Bacillus_insolitus	4.71784	0.139351	1.48804	0.0936471	0.925389	0.997838
										Haliscomenobacter_hydrossis	40.4963	0.0990528	1.09979	0.090065	0.928236	0.997838
										Clostridium_sphenoides	17.3621	0.0687164	0.757493	0.0907157	0.927719	0.997838
										bacterium_NLAE-zl-P623	5.75426	-0.0935287	1.02194	-0.0915207	0.927079	0.997838
										Thermoanaerobacterium_saccharolyticum	8.28859	0.0959511	1.01179	0.0948326	0.924448	0.997838
										Desulfotomaculum_sp_CYP9	6.01306	-0.102738	1.1043	-0.0930344	0.925876	0.997838
										Macellibacteroides_fermentans	2.88739	0.147515	1.61058	0.0915913	0.927023	0.997838
										Lactobacillus_sp_BL303	5.75262	0.15434	1.68345	0.0916803	0.926952	0.997838
										Dehalococcoides_mccartyi	8.60219	-0.0865636	0.988329	-0.0875858	0.930206	0.999293
										Bacillus_cellulosilyticus	6.63179	0.03306	0.99457	0.0332405	0.973483	0.999432
										Lachnospiraceae_bacterium_OBRC5-5	3.01512	-0.0806359	1.41763	-0.0568807	0.95464	0.999432
										Lactobacillus_johnsonii	80204.4	0.0728443	1.42462	0.0511326	0.95922	0.999432
										Mycoplasma_mycoides	5.67461	-0.0226356	1.16302	-0.0194628	0.984472	0.999432
										bacterium_Te16R	4.86024	-0.0521014	1.08615	-0.047969	0.961741	0.999432
										Methylobacterium_extorquens	3.35231	0.0195626	1.55489	0.0125814	0.989962	0.999432
										Flexistipes_sinusarabici	3.62569	0.0526242	1.26091	0.0417351	0.96671	0.999432
										[Bacteroides]_pectinophilus	5.56039	0.0228295	1.09243	0.0208979	0.983327	0.999432
										Clostridium_sp_Culture-46	14.8616	0.0344779	0.854926	0.0403286	0.967831	0.999432
										Sporomusa_sphaeroides	4.55355	0.0432058	1.30101	0.0332095	0.973508	0.999432
										Clostridiales_bacterium_SY8519	18.499	-0.0453543	0.822409	-0.0551481	0.95602	0.999432
										bacterium_NLAE-zl-C374	6.71323	-0.0135977	1.09585	-0.0124084	0.9901	0.999432
										rumen_bacterium_2/9293-25	3.93266	0.0658316	1.22237	0.0538556	0.95705	0.999432
										Robiginitalea_biformata	3.87113	-0.0414238	1.50635	-0.0274995	0.978061	0.999432
										Bacillus_coagulans	24.2032	-0.0128621	0.699805	-0.0183795	0.985336	0.999432
										Enterococcus_durans	4.16598	0.00418534	1.20373	0.00347697	0.997226	0.999432
										Clostridiaceae_bacterium_END-2	4.90644	0.0279704	1.12837	0.0247883	0.980224	0.999432
										bacterium_NLAE-zl-H325	3.61107	0.096308	1.29305	0.0744813	0.940627	0.999432
										Solibacillus_silvestris	6.74378	0.0274386	1.07132	0.0256119	0.979567	0.999432
										Bacteroides_salyersiae	2.7874	0.0234226	1.77894	0.0131666	0.989495	0.999432
										Lachnospiraceae_bacterium_canine_oral_taxon_062	4.82653	-0.00333299	1.18133	-0.00282138	0.997749	0.999432
										Gram-negative_bacterium_cL10-22	7.01132	0.0680643	1.24968	0.0544655	0.956564	0.999432
										butyrate-producing_bacterium_PH07AY3	3.39614	-0.107466	1.27571	-0.0842398	0.932866	0.999432
										Sporobacterium_olearium	3.32998	0.0429515	1.3336	0.0322072	0.974307	0.999432
										bacterium_NLAE-zl-P521	2.93869	-0.0336325	1.29368	-0.0259976	0.979259	0.999432
										bacterium_NLAE-zl-P45	2.67675	0.10284	1.40137	0.0733854	0.941499	0.999432
										Parasporobacterium_paucivorans	6.22115	0.0159125	1.32996	0.0119646	0.990454	0.999432
										Lactobacillus_sp_NBRC_14511	3.05208	0.14456	1.7249	0.0838076	0.933209	0.999432
										Paenibacillus_sp_Y412MC10	5.53709	-0.0092452	1.10143	-0.00839379	0.993303	0.999432
										Lachnospiraceae_bacterium_DJF_VP17k1	4.62745	-0.0304787	1.07014	-0.028481	0.977279	0.999432
										Rothia_sp_T40-1	241.312	-0.0120739	0.802905	-0.0150378	0.988002	0.999432
										bacterium_NLAE-zl-P835	4.62175	0.0773881	1.10264	0.0701846	0.944047	0.999432
										Anoxybacillus_flavithermus	3.44153	-0.106068	1.23601	-0.085815	0.931613	0.999432
										Streptococcus_oralis	4.53978	0.0489015	1.23573	0.039573	0.968434	0.999432
										Megasphaera_elsdenii	134.745	-0.019156	0.54424	-0.0351977	0.971922	0.999432
										Desulfotomaculum_sp_SAL2_S	4.22207	0.0819608	1.36849	0.0598912	0.952242	0.999432
										Bacillus_cereus	53.5726	0.0276528	0.587319	0.047083	0.962447	0.999432
										bacterium_NLAE-zl-P690	4.20497	-0.00725849	1.15583	-0.00627992	0.994989	0.999432
										Anaerostipes_butyraticus	23.6432	-0.000826076	0.701167	-0.00117814	0.99906	0.999432
										Clostridium_clostridioforme	91.9601	0.0230673	0.633282	0.036425	0.970943	0.999432
										Clostridium_sp_ZP3	20.2815	-0.0119399	0.71909	-0.0166042	0.986752	0.999432
										Clostridiales_bacterium_CIEAF_016	36.0814	-0.00980654	0.644749	-0.0152099	0.987865	0.999432
										Clostridiales_bacterium_CIEAF_013	225.357	-0.0542614	0.734577	-0.0738675	0.941116	0.999432
										bacterium_NLAE-zl-H369	3.46935	0.066433	1.21194	0.0548154	0.956286	0.999432
										Coprococcus_sp_DJF_CR49	7.41898	-0.0497854	1.01193	-0.0491985	0.960761	0.999432
										bacterium_ic1297	8.3348	0.0455051	0.949803	0.04791	0.961788	0.999432
										Hespellia_porcina	8.0851	-0.072088	1.03122	-0.0699056	0.944269	0.999432
										rumen_bacterium_NK3A20	2.95112	-0.00281484	1.33963	-0.00210121	0.998323	0.999432
										bacterium_NLAE-zl-G196	3.62318	0.0640268	1.27686	0.0501439	0.960008	0.999432
										bacterium_Te63R	5.69832	0.0140595	1.03894	0.0135325	0.989203	0.999432
										bacterium_NLAE-zl-H185	3.24038	-0.00260942	1.2409	-0.00210285	0.998322	0.999432
										bacterium_NLAE-zl-H180	3.54576	-0.0109723	1.2749	-0.0086064	0.993133	0.999432
										Krokinobacter_sp_4H-3-7-5	3.0275	-0.00315222	1.57421	-0.00200241	0.998402	0.999432
										Lactobacillus_pontis	3.18994	0.0789792	2.07968	0.0379765	0.969706	0.999432
										Mycoplasma_leachii	3.50861	-0.0478748	1.70719	-0.028043	0.977628	0.999432
										bacterium_NLAE-zl-H399	4.38547	0.0179456	1.12813	0.0159074	0.987308	0.999432
										Clostridium_sp_Culture_Jar-8	4.9627	-0.0547863	1.09394	-0.0500816	0.960057	0.999432
										Clostridium_sp_PPf35E6	4.31533	0.0353892	1.15643	0.0306022	0.975587	0.999432
										Clostridium_sp_CE6	3.92679	-0.0397439	1.24498	-0.0319234	0.974533	0.999432
										Blautia_schinkii	26.0096	0.0527935	0.8201	0.0643745	0.948672	0.999432
										Desulfomicrobium_baculatum	14.1376	0.0192007	0.892126	0.0215225	0.982829	0.999432
										bacterium_NLAE-zl-C134	5.91644	-0.083465	1.06641	-0.0782672	0.937615	0.999432
										swine_fecal_bacterium_SD-Xyl6	5.05441	-0.0917911	1.2613	-0.072775	0.941985	0.999432
										Clostridium_propionicum	28.1528	-0.00533267	0.75889	-0.00702694	0.994393	0.999432
										Alkaliphilus_metalliredigens	15.9395	0.0509974	0.7915	0.0644313	0.948627	0.999432
										Anaplasma_phagocytophilum	49.194	0.0371396	0.749687	0.0495401	0.960489	0.999432
										butyrate-producing_bacterium_L2-50	6.48709	-0.069114	0.98127	-0.0704332	0.943849	0.999432
										bacterium_NLAE-zl-H470	4.444	0.0422134	1.15712	0.0364815	0.970898	0.999432
										Clostridium_sp_Clone-3	115.461	-0.0433838	0.73459	-0.0590585	0.952906	0.999432
										Desulfosporosinus_meridiei	15.1912	-0.0554291	0.828838	-0.0668756	0.946681	0.999432
										rumen_bacterium_NK4A136	14.9697	-0.0308358	0.890916	-0.0346113	0.97239	0.999432
										bacterium_NLAE-zl-C544	4.19959	-0.0916718	1.19643	-0.076621	0.938925	0.999432
										bacterium_mpn-isolate_group_19	6.96961	-0.000745009	1.04719	-0.000711436	0.999432	0.999432
										Bifidobacterium_longum	323.606	-0.0272755	0.574896	-0.0474442	0.962159	0.999432
										Lachnospiraceae_bacterium_613	21.9534	-0.0639169	0.866385	-0.0737742	0.94119	0.999432
										bacterium_NLAE-zl-P752	3.17454	-0.0505345	1.29919	-0.0388969	0.968973	0.999432
										Butyrivibrio_sp_A	5.74137	-0.0740493	1.08897	-0.0679997	0.945786	0.999432
										Pseudobutyrivibrio_sp_4C60C	3.74177	0.0551197	1.22368	0.0450442	0.964072	0.999432
										Adlercreutzia_equolifaciens	20.1993	-0.025852	0.849782	-0.0304219	0.975731	0.999432
										Prochlorococcus_marinus	2.88861	0.0308944	1.50223	0.0205657	0.983592	0.999432
										bacterium_NLAE-zl-P883	5.96284	0.0781341	0.977738	0.0799131	0.936306	0.999432
										bacterium_NLAE-zl-C508	4.248	-0.00982858	1.11393	-0.00882335	0.99296	0.999432
										Paludibacter_propionicigenes	7.20554	0.113902	1.48177	0.0768687	0.938728	0.999432
										Clostridium_sp_Iso-A3	7.61007	0.0393973	0.988083	0.0398724	0.968195	0.999432
										Blautia_sp_A-C1-0c	5.64163	0.0669813	1.02152	0.0655704	0.94772	0.999432
										Lactobacillus_sp_	35.7585	-0.10202	1.32247	-0.0771435	0.938509	0.999432
										Bacteroides_uniformis	597.302	-0.00673093	0.786593	-0.00855707	0.993173	0.999432
										bacterium_NLAE-zl-P712	4.42575	0.0296106	1.16528	0.0254108	0.979727	0.999432
										bacterium_NLAE-zl-P713	3.43583	0.0403141	1.20901	0.0333447	0.9734	0.999432
										Lachnospiraceae_bacterium_canine_oral_taxon_036	7.29823	0.0297974	0.923146	0.0322781	0.97425	0.999432
										bacterium_NLAE-zl-411	5.06823	0.0715602	1.03749	0.068974	0.94501	0.999432
										Lachnospiraceae_bacterium_DJF_VP18k1	8.8039	0.0212955	0.900832	0.0236398	0.98114	0.999432
										Flavobacterium_indicum	7.24559	-0.0469902	1.09177	-0.0430404	0.965669	0.999432
										rumen_bacterium_NK4A95	9.26062	-0.0427316	0.935784	-0.045664	0.963578	0.999432
										Ruminococcus_sp_DJF_VR66	3.64268	0.103392	1.29515	0.0798301	0.936372	0.999432
										bacterium_NLAE-zl-C94	2.83489	0.0192289	1.31149	0.0146619	0.988302	0.999432
										Bacillus_subtilis	25.2949	-0.0596032	0.721697	-0.0825876	0.934179	0.999432
										bacterium_NLAE-zl-C223	4.69771	0.00815198	1.10965	0.00734645	0.994138	0.999432
										Desulfotomaculum_sp_CYP1	7.16543	-0.0302183	0.986203	-0.030641	0.975556	0.999432
										bacterium_NLAE-zl-P310	3.82056	0.0099452	1.18055	0.00842419	0.993279	0.999432
										rumen_bacterium_NK4A79	2.67294	-0.045039	1.49669	-0.0300925	0.975993	0.999432
										Alicyclobacillus_fastidiosus	3.11328	-0.0228719	1.37713	-0.0166083	0.986749	0.999432
										Firmicutes_str_C38	3.7138	-0.0919763	1.23127	-0.0747006	0.940453	0.999432
										Pantoea_ananatis	4.71395	-0.0738162	1.09519	-0.0674002	0.946263	0.999432
										Eubacterium_plexicaudatum	10.522	-0.0576533	1.03777	-0.0555549	0.955696	0.999432
										Ethanoligenens_harbinense	83.1269	0.018796	0.601639	0.0312412	0.975077	0.999432
										bacterium_NLAE-zl-H175	10.7572	0.0666062	0.888786	0.0749407	0.940262	0.999432
										Subdoligranulum_variabile	5.66021	-0.0739761	1.22124	-0.0605746	0.951698	0.999432
										bacterium_NLAE-zl-P645	5.38899	-0.00186935	1.09456	-0.00170785	0.998637	0.999432
										Clostridiales_bacterium_53-4c	356.907	0.0510723	0.810557	0.063009	0.949759	0.999432
										Seinonella_peptonophila	5.35911	-0.0194	1.0127	-0.0191567	0.984716	0.999432
										Oribacterium_sp_oral_taxon_102	11.5603	0.027752	0.826877	0.0335624	0.973226	0.999432
										Bacillus_sp_R-26955	0.385592	0.0150691	3.98866	0.003778	0.996986	NA
										Bacillus_sp_R-26950	0.300985	0.0150686	4.08047	0.00369285	0.997054	NA
										Selenomonas_bovis	0.609283	0.15415	2.69745	0.0571465	0.954428	NA
										Lactobacillus_secaliphilus	0.3459	1.93908	4.03234	0.480882	0.630601	NA
										Muricauda_sp_CC-HSB-11	0.68996	-1.50117	2.88793	-0.519809	0.603197	NA
										swine_manure_pit_bacterium_PPC12B	0.482628	2.43267	3.99638	0.608719	0.542711	NA
										Citrus_blotchy-mottle_phytoplasma	0.682166	1.41051	2.89274	0.487603	0.625831	NA
										bacterium_NLAE-zl-C470	1.71619	-0.715679	1.6644	-0.429991	0.667202	NA
										Bacillus_sp_R-26953	0.325134	0.0150686	4.08047	0.00369285	0.997054	NA
										Bacteroides_sp_B2	0.995901	-0.996948	3.00422	-0.331849	0.740003	NA
										Enterococcus_raffinosus	0.990628	0.0130032	2.11907	0.00613627	0.995104	NA
										rumen_bacterium_NK3A31	2.56726	0.360985	1.42123	0.253994	0.7995	NA
										Desulfovibrio_sp_VKM_B-2200	0.456749	-0.723742	3.75699	-0.192639	0.847242	NA
										bacterium_RS25G	0.370048	2.02522	4.02517	0.503139	0.614867	NA
										Halothiobacillus_neapolitanus	0.296738	0.0150686	4.08047	0.00369285	0.997054	NA
										Prevotella_genomosp_C1	0.3459	1.93908	4.03234	0.480882	0.630601	NA
										Prevotella_genomosp_C2	0.321752	1.84897	4.04029	0.457632	0.647217	NA
										Megasphaera_sp_BV3C16-1	1.30613	-0.188361	2.03741	-0.0924511	0.92634	NA
										Bacteroides_sp_CJ44	0.966797	-0.990722	2.61981	-0.378166	0.705307	NA
										Paenibacillus_sp_TRO4	0.730627	0.0451352	2.88329	0.0156541	0.98751	NA
										swine_fecal_bacterium_FPC63	0.621872	0.194259	2.68522	0.0723438	0.942328	NA
										swine_fecal_bacterium_FPC67	0.91677	-3.34883	2.52723	-1.3251	0.185139	NA
										swine_fecal_bacterium_FPC65	0.296574	1.74736	4.04985	0.431463	0.666132	NA
										Verrucomicrobia_bacterium_WD86	0.779789	1.64621	3.20743	0.513251	0.607776	NA
										rumen_bacterium_R4-23	1.23443	-1.55868	2.24573	-0.694065	0.487641	NA
										Staphylococcus_agnetis	2.05968	1.35688	1.65519	0.819774	0.412345	NA
										Pedobacter_sp_An13	0.321752	1.84897	4.04029	0.457632	0.647217	NA
										Clostridium_sp_T7(2010)	0.428506	-0.752365	3.84173	-0.19584	0.844735	NA
										rumen_bacterium_NK4A5235	0.296574	1.74736	4.04985	0.431463	0.666132	NA
										Spiroplasma_endosymbiont_of_Drosophila_mojavensis	0.288396	0.0150686	4.08047	0.00369285	0.997054	NA
										Carnobacterium_maltaromaticum	0.822436	-1.87695	3.17673	-0.590845	0.554624	NA
										bacterium_NLAE-zl-G35	2.19515	-0.988697	1.89057	-0.522963	0.601	NA
										bacterium_NLAE-zl-G36	1.17635	2.45553	2.21123	1.11048	0.266792	NA
										bacterium_NLAE-zl-G33	0.597724	0.127091	3.02585	0.0420019	0.966497	NA
										Clostridium_sp_U101-b	0.580888	0.0964163	3.04799	0.0316327	0.974765	NA
										Christensenella_minuta	1.03441	0.522563	2.2263	0.234722	0.814425	NA
										alpha_proteobacterium_SCGC_AAA008-A11	0.309163	1.79883	4.04493	0.444712	0.656528	NA
										Desulfothermus_naphthae	0.886281	-1.999	2.42267	-0.825125	0.4093	NA
										Owenweeksia_hongkongensis	2.55489	1.00199	1.79039	0.55965	0.575718	NA
										Bacteroides_sp_GrassCarp9	0.546468	0.888381	3.5588	0.24963	0.802874	NA
										Lactobacillus_spicheri	0.296574	1.74736	4.04985	0.431463	0.666132	NA
										Gemella_sp_'ARUP_UnID_333'	0.288396	0.0150686	4.08047	0.00369285	0.997054	NA
										Haloferula_sp_cau1074	1.81646	3.17699	2.28964	1.38755	0.165275	NA
										Chryseobacterium_sp_PL-1	0.309163	1.79883	4.04493	0.444712	0.656528	NA
										Proteiniphilum_sp_canine_oral_taxon_385	0.461861	0.887851	3.75264	0.236594	0.812972	NA
										Campylobacter_ureolyticus	0.783613	1.88661	3.19135	0.591163	0.554411	NA
										Prevotella_sp_ICM33	0.309163	1.79883	4.04493	0.444712	0.656528	NA
										rumen_bacterium_8/9293-1A	1.30871	1.00744	2.42127	0.416078	0.677353	NA
										Lachnospiraceae_bacterium_DJF_VP52	2.59356	0.885424	1.42589	0.620961	0.534625	NA
										bacterium_RS13G	0.555072	2.61674	3.98576	0.656521	0.511489	NA
										Pediococcus_inopinatus	1.17565	0.461931	2.0029	0.230632	0.817601	NA
										Streptococcus_infantis	0.54345	-2.60772	3.98613	-0.654198	0.512984	NA
										Lactobacillus_sp_KC38	1.96792	0.136646	1.90182	0.07185	0.942721	NA
										Lactobacillus_fructivorans	0.370048	2.02522	4.02517	0.503139	0.614867	NA
										Microcoleus_chthonoplastes	0.364826	-1.98431	4.0281	-0.492616	0.622284	NA
										Bacteroides_sp_1BL	2.4686	-0.903342	1.68353	-0.536575	0.591561	NA
										bacterium_NLAE-zl-H427	0.970888	-2.14656	2.66297	-0.806076	0.420199	NA
										Mitsuokella_jalaludinii	1.3049	1.45701	2.17094	0.67114	0.502131	NA
										bacterium_NLAE-zl-H423	0.296738	0.0150686	4.08047	0.00369285	0.997054	NA
										bacterium_NLAE-zl-H421	0.898866	-3.27696	3.51517	-0.932234	0.351215	NA
										Verrucomicrobium_sp_MS229b	1.98906	2.2359	2.09839	1.06553	0.286636	NA
										Lactobacillus_catenaformis	0.436848	-0.743909	3.32001	-0.224068	0.822704	NA
										Spiroplasma_endosymbiont_of_Drosophila_hydei	1.56829	0.559042	1.79804	0.310917	0.755863	NA
										bacterium_NLAE-zl-P446	0.420329	-2.23876	4.00883	-0.558456	0.576533	NA
										bacterium_NLAE-zl-P447	1.42441	-0.949068	2.09221	-0.453621	0.650102	NA
										bacterium_NLAE-zl-P441	0.698137	-0.0779733	2.62075	-0.0297523	0.976265	NA
										Bacillus_sp_VITABR13	0.321752	1.84897	4.04029	0.457632	0.647217	NA
										bacterium_NLAE-zl-P448	1.01607	1.28928	2.64216	0.487962	0.625577	NA
										Prevotella_sp_N19-31	0.288396	0.0150686	4.08047	0.00369285	0.997054	NA
										Alicyclobacillus_sp_DSM_11984	0.373003	0.0150689	4.03482	0.0037347	0.99702	NA
										Kineococcus_radiotolerans	0.411834	-2.21511	3.81363	-0.580841	0.561348	NA
										Paenibacillus_turicensis	1.09416	-2.38531	2.53944	-0.939308	0.347573	NA
										Pedobacter_sp_H6(2010)	0.280219	-1.71253	4.04547	-0.423321	0.672061	NA
										Lactobacillus_sp_Hon2	0.441095	-0.752694	3.80399	-0.19787	0.843147	NA
										Bacillus_sp_ikaite_c5	0.364826	-1.98431	4.0281	-0.492616	0.622284	NA
										Paenibacillus_sp_Be17	1.10875	1.46116	2.53219	0.577035	0.563916	NA
										Riemerella_columbina	0.3459	1.93908	4.03234	0.480882	0.630601	NA
										Veillonella_sp_MSA12	0.321752	1.84897	4.04029	0.457632	0.647217	NA
										bacterium_NLAE-zl-G397	0.325134	0.0150686	4.08047	0.00369285	0.997054	NA
										Spiroplasma_endosymbiont_of_Drosophila_melanogaster	0.589382	0.0688435	3.03696	0.0226685	0.981915	NA
										Clostridium_sp_cfp1	0.75757	0.696204	2.5091	0.277471	0.781419	NA
										Micrococcus_sp_TM4_2	0.564368	-1.28208	3.04021	-0.421707	0.673239	NA
										Lactobacillus_sp_NBRC_107239	0.296738	0.0150686	4.08047	0.00369285	0.997054	NA
										Lactobacillus_sp_NBRC_107236	0.333311	1.89123	4.0365	0.468532	0.639404	NA
										Bacteroides_sp_HGBC28	0.610309	-1.27878	3.45921	-0.369672	0.711627	NA
										Bacteroides_sp_HGBC29	0.385592	0.0150691	3.98866	0.003778	0.996986	NA
										Bacteroides_sp_HGBC22	0.364826	-1.98431	4.0281	-0.492616	0.622284	NA
										Bacteroides_sp_HGBC26	0.449433	-2.26004	4.00737	-0.563971	0.572774	NA
										Enterobacteriaceae_bacterium_R6-5	0.280219	-1.71253	4.04547	-0.423321	0.672061	NA
										bacterium_NLAE-zl-G248	0.449433	-2.26004	4.00737	-0.563971	0.572774	NA
										Caldanaerobacter_subterraneus	0.360579	-1.96832	4.02942	-0.488488	0.625204	NA
										Peptostreptococcaceae_bacterium_canine_oral_taxon_139	1.38778	0.52838	1.85928	0.284185	0.776269	NA
										Clostridium_sp_F15	2.27406	-0.353516	1.43556	-0.246256	0.805484	NA
										Planktothrix_agardhii	0.954368	-3.36997	2.90782	-1.15893	0.246483	NA
										Selenomonas_sp_oral_taxon_F80	1.00138	-3.4556	2.44703	-1.41216	0.157903	NA
										Cytophaga_sp_UDC369	0.506776	2.49513	3.56786	0.699334	0.484343	NA
										Bacillus_sp_HJB001	0.54985	-1.00378	3.11908	-0.321818	0.747591	NA
										Natronincola_histidinovorans	1.44176	-2.85965	2.41854	-1.18239	0.237052	NA
										Bacillus_sp_HJB002	0.525702	-1.00501	3.1602	-0.318021	0.750469	NA
										Bacillus_sp_HJB008	0.296738	0.0150686	4.08047	0.00369285	0.997054	NA
										anaerobic_bacterium_ANA_No_27	0.54985	-1.00378	3.11908	-0.321818	0.747591	NA
										Clostridiales_bacterium_r28	1.59157	0.0603866	1.76468	0.0342197	0.972702	NA
										bacterium_NLAE-zl-C498	0.626119	0.192056	2.99082	0.0642154	0.948799	NA
										bacterium_NLAE-zl-C499	1.29231	1.4419	2.15998	0.667556	0.504417	NA
										bacterium_NLAE-zl-C496	1.12041	-2.47858	2.48162	-0.998775	0.317904	NA
										bacterium_NLAE-zl-C497	2.36415	-1.34615	1.46341	-0.919877	0.357637	NA
										bacterium_NLAE-zl-C494	2.36173	0.287139	1.42321	0.201754	0.840109	NA
										bacterium_NLAE-zl-C495	2.61603	-0.260537	1.49777	-0.17395	0.861905	NA
										bacterium_NLAE-zl-C493	1.88509	-0.374248	1.71006	-0.218851	0.826766	NA
										bacterium_NLAE-zl-C490	1.79736	0.864287	1.60155	0.539655	0.589435	NA
										Bacteroidetes_bacterium_HY3	2.2823	1.63712	1.69347	0.966723	0.333683	NA
										Mycoplasma_capricolum	1.52113	1.38705	2.33561	0.593869	0.5526	NA
										Lactobacillus_psittaci	0.859173	-1.87523	3.1362	-0.597932	0.549885	NA
										Sphingobium_japonicum	0.712655	-0.498238	2.83405	-0.175804	0.860448	NA
										Butyrivibrio_sp_JK612	1.91558	-0.482545	1.69096	-0.285367	0.775363	NA
										Leuconostoc_sp_C2	1.83673	1.68773	1.76766	0.954782	0.339688	NA
										Streptococcus_sp_M-S-TSA_29	0.424259	-0.743466	3.35	-0.22193	0.824368	NA
										Porphyromonas_sp_UQD_450	0.826687	-0.623922	2.73995	-0.227713	0.819869	NA
										Porphyromonas_sp_UQD_451	0.815939	3.18794	2.66396	1.19669	0.231427	NA
										Porphyromonas_sp_UQD_452	0.506776	2.49513	3.56786	0.699334	0.484343	NA
										bacterium_NLAE-zl-P478	0.506776	2.49513	3.56786	0.699334	0.484343	NA
										Clostridium_sp_BG-C151	2.19562	-0.0774295	2.18081	-0.0355048	0.971677	NA
										Clostridiales_bacterium_oral_taxon_366	2.53406	-0.681056	1.44024	-0.472877	0.636301	NA
										Thermobacillus_sp_YonhaC149	0.309163	1.79883	4.04493	0.444712	0.656528	NA
										Petrobacter_succinatimandens	0.610309	-1.27878	3.45921	-0.369672	0.711627	NA
										Burkholderia_soli	0.755641	1.58495	2.82782	0.560485	0.575149	NA
										bacterium_NLAE-zl-G13	1.9239	-0.528321	1.7251	-0.306256	0.75941	NA
										bacterium_NLAE-zl-G16	0.441095	-0.752694	3.80399	-0.19787	0.843147	NA
										Staphylococcus_xylosus	0.288396	0.0150686	4.08047	0.00369285	0.997054	NA
										Pelobacter_propionicus	1.79385	-3.2107	1.99128	-1.61239	0.106878	NA
										bacterium_NLAE-zl-G493	0.856058	2.01751	2.72974	0.739085	0.459856	NA
										Lachnospiraceae_bacterium_oral_taxon_496	1.33991	0.117528	1.93296	0.0608023	0.951517	NA
										Clostridia_bacterium_S710(2)-1	0.309163	1.79883	4.04493	0.444712	0.656528	NA
										Exiguobacterium_sp_PHSAD-2	0.568298	0.0502935	3.49892	0.014374	0.988532	NA
										bacterium_NLAE-zl-C540	0.546468	0.888381	3.5588	0.24963	0.802874	NA
										Eubacterium_dolichum	1.20077	-2.57294	2.51171	-1.02438	0.305658	NA
										Peptococcaceae_bacterium_Ri50	0.521455	-0.989954	3.16681	-0.312603	0.754582	NA
										bacterium_NLAE-zl-H249	0.999283	-2.15294	2.64427	-0.814189	0.415536	NA
										Lactobacillus_sp_OS72	0.585295	-2.65738	3.42302	-0.776326	0.437556	NA
										Fusobacterium_sp_canine_oral_taxon_189	0.271725	-1.68262	4.0472	-0.41575	0.677593	NA
										Paenibacillus_sp_DJM4E11	0.877939	-2.01569	2.68364	-0.751102	0.452591	NA
										Paenibacillus_sp_DJM4E10	0.496441	-2.44639	3.5933	-0.680818	0.495986	NA
										bacterium_NLAE-zl-G235	0.980133	-1.20184	2.5923	-0.463618	0.642921	NA
										bacterium_NLAE-zl-G232	1.17758	0.151668	2.17543	0.0697187	0.944418	NA
										Eubacterium_sp_TW2	1.38407	2.84952	2.13138	1.33693	0.181244	NA
										Helicobacter_typhlonius	0.300985	0.0150686	4.08047	0.00369285	0.997054	NA
										Phocaeicola_abscessus	0.750258	0.662916	2.79887	0.236852	0.812772	NA
										Clostridium_sp_A4-33	0.605353	-1.2855	3.42942	-0.374846	0.707775	NA
										Prevotella_sp_ICM55	0.296738	0.0150686	4.08047	0.00369285	0.997054	NA
										Bacteroidaceae_bacterium_DJF_B220	0.750418	-1.68732	2.84013	-0.5941	0.552445	NA
										Mariprofundus_sp_GSB2	0.409741	0.0150697	3.90624	0.00385784	0.996922	NA
										bovine_rumen_bacterium_niuC11	0.564368	-1.28208	3.04021	-0.421707	0.673239	NA
										Firmicutes_bacterium_1229-1IIA	0.409741	0.0150697	3.90624	0.00385784	0.996922	NA
										bacterium_1168_2009	0.581204	-1.28468	3.47486	-0.369707	0.711601	NA
										Paenibacillus_sp_b3(2010)	0.373003	0.0150689	4.03482	0.0037347	0.99702	NA
										Desulfovibrio_sp_M1	0.449433	-2.26004	4.00737	-0.563971	0.572774	NA
										bacterium_NLAE-zl-H324	0.504935	-2.46911	3.57472	-0.690714	0.489745	NA
										rumen_bacterium_1/9293-11A	1.48297	-1.02761	1.82028	-0.564534	0.57239	NA
										bacterium_NLAE-zl-H321	0.461861	0.887851	3.75264	0.236594	0.812972	NA
										Coconut_lethal_yellowing_phytoplasma	0.59772	-1.2798	3.48212	-0.367535	0.71322	NA
										Geobacillus_sp_C56-T3	1.27478	0.0305404	1.94332	0.0157156	0.987461	NA
										Rhodospirillum_oryzae	0.271725	-1.68262	4.0472	-0.41575	0.677593	NA
										Bacteroidaceae_bacterium_SV444	0.530924	2.5545	3.51628	0.72648	0.467545	NA
										Peptostreptococcaceae_bacterium_canine_oral_taxon_303	0.436848	-0.743909	3.32001	-0.224068	0.822704	NA
										rumen_bacterium_8/9293-30	1.82479	-0.728592	1.7241	-0.422592	0.672593	NA
										Desulfovibrio_sp_LVS-15	0.461861	0.887851	3.75264	0.236594	0.812972	NA
										Lachnospiraceae_bacterium_canine_oral_taxon_136	1.62051	1.212	1.81136	0.669109	0.503426	NA
										bacterium_LKS-AN-6	2.06929	-0.705809	1.85782	-0.379914	0.70401	NA
										Salinispora_arenicola	1.51562	-0.369036	1.86898	-0.197453	0.843473	NA
										Enterococcus_dispar	0.275972	-1.69765	4.04633	-0.419554	0.674811	NA
										rumen_bacterium_8/9293-5	1.78365	0.176198	1.74004	0.101261	0.919343	NA
										bacterium_NLAE-zl-H409	0.449433	-2.26004	4.00737	-0.563971	0.572774	NA
										bacterium_NLAE-zl-H402	1.49147	-1.04485	2.05479	-0.508495	0.611106	NA
										bacterium_NLAE-zl-H406	0.385592	0.0150691	3.98866	0.003778	0.996986	NA
										bacterium_NLAE-zl-H407	1.32626	1.08496	2.40771	0.450619	0.652264	NA
										Microbacterium_testaceum	0.271725	-1.68262	4.0472	-0.41575	0.677593	NA
										Thermoactinomyces_sp_RM4	2.00444	2.49536	1.7909	1.39336	0.163512	NA
										delta_proteobacterium_S610(2)-1	0.296738	0.0150686	4.08047	0.00369285	0.997054	NA
										bacterium_UASWS0117	1.41504	-0.30995	2.09924	-0.147648	0.882621	NA
										Clostridiales_bacterium_DJF_VP48	2.25916	-0.502172	1.50699	-0.333228	0.738962	NA
										Microvirgula_aerodenitrificans	1.19248	-0.308638	2.51625	-0.122658	0.902378	NA
										Thermobacillus_sp_NBM6	1.14741	0.384571	2.00852	0.191469	0.848158	NA
										Thermoanaerobacter_mathranii	2.17182	0.411923	1.72953	0.23817	0.811749	NA
										Lachnospiraceae_bacterium_oral_taxon_B18	0.288396	0.0150686	4.08047	0.00369285	0.997054	NA
										delta_proteobacterium_S110(4)	0.449433	-2.26004	4.00737	-0.563971	0.572774	NA
										Desulfomicrobium_apsheronum	0.546468	0.888381	3.5588	0.24963	0.802874	NA
										Campylobacter_hominis	0.296738	0.0150686	4.08047	0.00369285	0.997054	NA
										Clostridia_bacterium_oral_taxon_E60	0.436848	-0.743909	3.32001	-0.224068	0.822704	NA
										Delftia_tsuruhatensis	0.373003	0.0150689	4.03482	0.0037347	0.99702	NA
										Clostridium_sp_17	1.31801	-0.832573	2.13935	-0.389171	0.69715	NA
										Paenibacillus_illinoisensis	0.280219	-1.71253	4.04547	-0.423321	0.672061	NA
										Spiroplasma_endosymbiont_of_Drosophila_aldrichi	0.296574	1.74736	4.04985	0.431463	0.666132	NA
										Clostridium_quinii	1.08614	-2.39867	2.569	-0.933697	0.35046	NA
										Thermoanaerobacter_sp_AND32	0.284149	0.0150686	4.08047	0.00369285	0.997054	NA
										Streptococcus_hyointestinalis	1.02623	-0.278829	2.26152	-0.123293	0.901875	NA
										Selenomonas_sp_oral_taxon_F19	0.360579	-1.96832	4.02942	-0.488488	0.625204	NA
										bacterium_RA2114	0.956048	2.22636	2.35769	0.944299	0.345017	NA
										Peptostreptococcaceae_bacterium_canine_oral_taxon_155	1.97292	0.408006	1.60663	0.253951	0.799533	NA
										bacterium_NLAE-zl-C124	0.57271	-1.2704	3.02598	-0.419832	0.674608	NA
										bacterium_NLAE-zl-C125	0.797262	-0.686998	2.48744	-0.276187	0.782404	NA
										swine_manure_pit_bacterium_PPC95	1.36702	-0.101093	1.86003	-0.0543503	0.956656	NA
										swine_manure_pit_bacterium_PPC93	1.16634	-0.595608	2.19329	-0.271559	0.785961	NA
										swine_manure_pit_bacterium_PPC92	1.82887	-0.256858	1.54349	-0.166413	0.867832	NA
										Arcobacter_nitrofigilis	0.364826	-1.98431	4.0281	-0.492616	0.622284	NA
										swine_manure_pit_bacterium_PPC90	0.691737	-1.65632	3.29595	-0.502533	0.615293	NA
										Lactobacillus_oeni	1.77707	-0.620971	1.80873	-0.343319	0.731359	NA
										Paraeggerthella_hongkongensis	0.687806	-2.95247	3.16454	-0.932988	0.350826	NA
										bacterium_WH1-8	0.280219	-1.71253	4.04547	-0.423321	0.672061	NA
										Burkholderia_sp_MSMB20	0.333311	1.89123	4.0365	0.468532	0.639404	NA
										Gemella_sp_WAL_1945J	0.61849	1.47203	3.41797	0.430674	0.666706	NA
										Leptolyngbya_sp_PCC_7410	0.428506	-0.752365	3.84173	-0.19584	0.844735	NA
										Leuconostoc_lactis	2.45048	0.0512017	1.62752	0.03146	0.974903	NA
										Clostridia_bacterium_HZ254C	0.320887	0.0150686	4.08047	0.00369285	0.997054	NA
										Lactobacillus_antri	1.2929	0.313139	2.18509	0.143307	0.886048	NA
										Paenibacillus_sp_YFb2	0.284149	0.0150686	4.08047	0.00369285	0.997054	NA
										Lactobacillus_acidipiscis	0.718903	1.49917	2.57492	0.582218	0.56042	NA
										bacterium_NLAE-zl-G79	1.33949	0.478748	2.11435	0.226428	0.820868	NA
										bacterium_NLAE-zl-G78	1.05093	1.41102	2.50845	0.562507	0.57377	NA
										Cyanothece_sp_ATCC_51142	0.385592	0.0150691	3.98866	0.003778	0.996986	NA
										Kyrpidia_tusciae	0.990628	0.0130032	2.11907	0.00613627	0.995104	NA
										Clostridium_sp_AL05-3	0.280219	-1.71253	4.04547	-0.423321	0.672061	NA
										Clostridium_sp_AL05-4	2.22042	-1.223	1.9828	-0.616804	0.537364	NA
										Zunongwangia_profunda	0.990945	-0.920902	2.35431	-0.391155	0.695682	NA
										Porphyromonas_sp_canine_oral_taxon_239	2.01747	3.36219	1.96078	1.71471	0.0863976	NA
										Halothermothrix_orenii	2.50125	0.288046	1.56142	0.184476	0.85364	NA
										Mollicutes_bacterium_B1	0.296738	0.0150686	4.08047	0.00369285	0.997054	NA
										Bacteroides_coprosuis	0.956209	0.280475	2.65567	0.105614	0.915889	NA
										Pelosinus_sp_UFO1	0.556191	-2.64518	3.43779	-0.769441	0.441631	NA
										Paenibacillus_sp_DJM1H1	0.409741	0.0150697	3.90624	0.00385784	0.996922	NA
										Leuconostoc_gelidum	0.445025	0.842866	3.30654	0.254908	0.798794	NA
										Gelria_glutamica	0.875959	2.06558	3.10786	0.664632	0.506286	NA
										Bacteroidales_bacterium_P2	0.731492	1.53019	2.84783	0.537317	0.591048	NA
										swine_manure_bacterium_RT-6B	0.411834	-2.21511	3.81363	-0.580841	0.561348	NA
										bacterium_NLAE-zl-G214	2.12223	0.205643	1.50223	0.136892	0.891116	NA
										Paenibacillus_sp_DJM4B1	1.92429	0.807561	1.8136	0.445282	0.656116	NA
										bacterium_NLAE-zl-G218	0.6918	2.94058	3.19307	0.920926	0.357089	NA
										bacterium_WH2-2	1.03801	3.54383	3.3397	1.06112	0.288634	NA
										Bacillus_murimartini	0.309163	1.79883	4.04493	0.444712	0.656528	NA
										Lactobacillus_sp_Adhmto1	0.852676	3.2448	2.98488	1.08708	0.277002	NA
										Clostridiales_bacterium_oral_taxon_E35	0.494187	2.46194	3.1267	0.787392	0.431053	NA
										Thermoactinomycetaceae_bacterium_NariEX	0.321752	1.84897	4.04029	0.457632	0.647217	NA
										Aeromonas_veronii	0.420012	-0.722574	3.86586	-0.186912	0.85173	NA
										Bacillus_sp_	0.621872	0.194259	2.68522	0.0723438	0.942328	NA
										Acetohalobium_arabaticum	0.610309	-1.27878	3.45921	-0.369672	0.711627	NA
										Trichococcus_sp_R210	0.275972	-1.69765	4.04633	-0.419554	0.674811	NA
										Thermoactinomycetaceae_bacterium_1335	2.31881	0.427972	1.42326	0.300698	0.763645	NA
										Clostridium_sp_ZH11	0.333311	1.89123	4.0365	0.468532	0.639404	NA
										Oscillospira_sp_D	2.65229	0.0895777	1.57661	0.0568167	0.954691	NA
										Oscillospira_sp_B	2.39149	1.69297	1.92342	0.88019	0.378756	NA
										Firmicutes_bacterium_LX-B	0.500688	-2.45447	3.11875	-0.787005	0.431279	NA
										bacterium_NLAE-zl-C351	0.325134	0.0150686	4.08047	0.00369285	0.997054	NA
										Firmicutes_bacterium_LX-D	0.456749	-0.723742	3.75699	-0.192639	0.847242	NA
										bacterium_NLAE-zl-C352	0.959531	-3.43106	2.85866	-1.20023	0.230049	NA
										bacterium_NLAE-zl-C359	1.53339	3.01115	2.29883	1.30987	0.190241	NA
										Bacteroidetes_bacterium_TRS1-A1	0.385592	0.0150691	3.98866	0.003778	0.996986	NA
										Macrococcus_sp_R214A8	0.280219	-1.71253	4.04547	-0.423321	0.672061	NA
										Dechloromonas_aromatica	0.449433	-2.26004	4.00737	-0.563971	0.572774	NA
										Prevotella_albensis	0.737833	-0.411541	2.80978	-0.146467	0.883553	NA
										Chlorobi_bacterium_canine_oral_taxon_312	0.449433	-2.26004	4.00737	-0.563971	0.572774	NA
										Bacillus_psychrodurans	0.779366	1.8866	3.19661	0.590186	0.555066	NA
										Erwinia_tasmaniensis	0.409741	0.0150697	3.90624	0.00385784	0.996922	NA
										Lachnospiraceae_bacterium_DJF_RR13	1.36604	-1.75123	1.93965	-0.902857	0.366602	NA
										Brevibacillus_sp_K282	0.275972	-1.69765	4.04633	-0.419554	0.674811	NA
										Lactobacillus_sp_JCM_5867	0.570616	0.969824	3.08848	0.314014	0.753511	NA
										bacterium_NLAE-zl-P624	0.385592	0.0150691	3.98866	0.003778	0.996986	NA
										Lactobacillus_sp_JCM_5868	0.321752	1.84897	4.04029	0.457632	0.647217	NA
										Lactobacillus_sp_JCM_5869	1.06001	0.121449	2.568	0.0472932	0.96228	NA
										Paenibacillus_validus	0.640798	-2.82104	2.85929	-0.986621	0.323828	NA
										Ornithobacterium_rhinotracheale	1.18726	-2.50841	2.55135	-0.983167	0.325525	NA
										Streptococcus_sp_NUM_1801	0.271725	-1.68262	4.0472	-0.41575	0.677593	NA
										bacterium_NLAE-zl-H463	0.82244	-0.607696	2.46989	-0.246042	0.80565	NA
										bacterium_NLAE-zl-H461	0.449433	-2.26004	4.00737	-0.563971	0.572774	NA
										bacterium_NLAE-zl-H464	0.364826	-1.98431	4.0281	-0.492616	0.622284	NA
										bacterium_NLAE-zl-H465	0.449433	-2.26004	4.00737	-0.563971	0.572774	NA
										Streptococcus_sp_NUM_1808	0.271725	-1.68262	4.0472	-0.41575	0.677593	NA
										Lactobacillus_sp_ls79	1.78812	1.10784	1.98017	0.559466	0.575844	NA
										Paenibacillus_sp_JS10-07	0.605736	2.76974	3.35177	0.826351	0.408605	NA
										bacterium_NLAE-zl-P483	0.795333	-0.291356	2.82928	-0.102979	0.91798	NA
										bacterium_NLAE-zl-P485	0.54985	-1.00378	3.11908	-0.321818	0.747591	NA
										bacterium_NLAE-zl-P486	0.449433	-2.26004	4.00737	-0.563971	0.572774	NA
										Bacteriovorax_sp_NF3	0.457614	0.887821	3.76434	0.23585	0.813549	NA
										Porphyromonas_sp_MI10-1288x	1.87088	-0.734329	1.94462	-0.37762	0.705713	NA
										Alkalibacterium_sp_I-5	2.30256	-2.55753	1.70935	-1.4962	0.134602	NA
										Lachnospiraceae_bacterium_oral_taxon_B32	0.325134	0.0150686	4.08047	0.00369285	0.997054	NA
										Clostridiaceae_bacterium_DJF_VR76	1.91896	-0.935401	1.70101	-0.549909	0.582382	NA
										Desulfosporosinus_sp_JG32A	0.449433	-2.26004	4.00737	-0.563971	0.572774	NA
										Exiguobacterium_aestuarii	0.457614	0.887821	3.76434	0.23585	0.813549	NA
										Moorea_bouillonii	0.504935	-2.46911	3.57472	-0.690714	0.489745	NA
										Lactobacillus_sp_Mbopo2t4	0.3459	1.93908	4.03234	0.480882	0.630601	NA
										Desulfurobacterium_thermolithotrophum	0.718903	1.49917	2.57492	0.582218	0.56042	NA
										Veillonella_sp_OK2	0.568298	0.0502935	3.49892	0.014374	0.988532	NA
										Desulfovibrio_sp_J01	1.1956	-2.50239	2.54624	-0.982776	0.325717	NA
										Paenibacillus_pueri	0.457449	2.36438	3.68344	0.641893	0.520943	NA
										Clostridium_paraputrificum	0.91677	-3.34883	2.52723	-1.3251	0.185139	NA
										Prevotella_sp_326-8	0.746171	-1.67759	2.84356	-0.589963	0.555216	NA
										Clostridium_sp_U41	1.2155	0.171413	2.17971	0.0786405	0.937319	NA
										Clostridium_sp_30	1.67466	-2.04222	1.92689	-1.05986	0.28921	NA
										Lactobacillus_sp_NBRC_107270	0.296574	1.74736	4.04985	0.431463	0.666132	NA
										Rhodomicrobium_vannielii	0.373003	0.0150689	4.03482	0.0037347	0.99702	NA
										Desulfotomaculum_reducens	1.78187	0.341962	1.60029	0.213688	0.830791	NA
										Lactobacillus_sp_GV6	0.333311	1.89123	4.0365	0.468532	0.639404	NA
										Burkholderia_sp_KM-F5-1	0.385592	0.0150691	3.98866	0.003778	0.996986	NA
										rumen_bacterium_NK4B29	1.23852	-1.51061	2.14308	-0.704877	0.480887	NA
										Janthinobacterium_lividum	0.54985	-1.00378	3.11908	-0.321818	0.747591	NA
										endophytic_bacterium_WR7A	0.280219	-1.71253	4.04547	-0.423321	0.672061	NA
										bacterium_NLAE-zl-C102	2.16644	0.605257	1.56116	0.387698	0.69824	NA
										Clostridium_sp_AG04-12	0.296574	1.74736	4.04985	0.431463	0.666132	NA
										bacterium_NLAE-zl-C105	1.64675	0.439039	1.97036	0.222821	0.823675	NA
										Clostridium_sp_AG04-17	0.280219	-1.71253	4.04547	-0.423321	0.672061	NA
										Bacteroides_sp_Smarlab_3301643	0.955343	-0.649171	2.65825	-0.24421	0.807068	NA
										Bacteroides_sp_CCUG_39913	1.25703	1.69306	2.18701	0.774143	0.438846	NA
										Eubacterium_sp_F1	1.16921	1.20484	2.55861	0.470899	0.637713	NA
										Clostridium_sp_CZDT-1	1.56759	-0.497724	1.64995	-0.30166	0.762911	NA
										Spiroplasma_sp_SHRIMP	2.46296	-0.672818	1.67413	-0.401891	0.687765	NA
										Streptococcus_porcinus	1.28112	-0.865237	2.09242	-0.41351	0.679233	NA
										Bacillus_ginsengihumi	0.564368	-1.28208	3.04021	-0.421707	0.673239	NA
										Olsenella_umbonata	0.504935	-2.46911	3.57472	-0.690714	0.489745	NA
										Bacillales_bacterium_'ARUP_UnID_122'	0.288396	0.0150686	4.08047	0.00369285	0.997054	NA
										Clostridia_bacterium_S710(0)-1	2.06031	0.926466	2.1349	0.433962	0.664316	NA
										Staphylococcus_schleiferi	0.836093	-2.00223	2.67302	-0.749052	0.453826	NA
										Rikenellaceae_bacterium_4-1-11	0.309163	1.79883	4.04493	0.444712	0.656528	NA
										Paraprevotella_xylaniphila	1.90844	1.50412	1.80526	0.833187	0.404739	NA
										Veillonella_sp_JCM_17976	1.43366	-0.99978	2.70113	-0.370134	0.711283	NA
										Sedimentibacter_sp_B4	0.296574	1.74736	4.04985	0.431463	0.666132	NA
										rumen_bacterium_8/94-29A	1.98093	1.30434	1.65595	0.787666	0.430892	NA
										Chryseobacterium_sp_QT2	0.321752	1.84897	4.04029	0.457632	0.647217	NA
										epsilon_proteobacterium_496Chim	0.321752	1.84897	4.04029	0.457632	0.647217	NA
										Helicobacter_macacae	1.07594	2.43892	2.52018	0.967756	0.333166	NA
										Haloplasma_contractile	0.325134	0.0150686	4.08047	0.00369285	0.997054	NA
										Thermoactinomyces_sp_E302	0.641773	0.312042	3.38273	0.0922457	0.926503	NA
										Bacillus_sp_3544BBRRJ	0.320887	0.0150686	4.08047	0.00369285	0.997054	NA
										bacterium_NLAE-zl-P545	0.385592	0.0150691	3.98866	0.003778	0.996986	NA
										Clostridium_sp_FA2/18	0.428506	-0.752365	3.84173	-0.19584	0.844735	NA
										Chryseobacterium_sp_CI22	0.300985	0.0150686	4.08047	0.00369285	0.997054	NA
										Globicatella_sp_canine_oral_taxon_107	0.424259	-0.743466	3.35	-0.22193	0.824368	NA
										Prosthecobacter_fusiformis	0.925121	3.35632	3.46875	0.967587	0.333251	NA
										Aerococcus_urinaeequi	0.580888	0.0964163	3.04799	0.0316327	0.974765	NA
										Clostridiaceae_bacterium_Aso3-CS533	0.48601	0.971377	3.2271	0.301006	0.76341	NA
										Methylophaga_sp_JAM1	0.671034	1.58627	2.91365	0.544427	0.586148	NA
										Sphingobacterium_sp_PM2-P1-29	0.838246	-0.587341	2.46014	-0.238743	0.811305	NA
										Leptospira_interrogans	0.275972	-1.69765	4.04633	-0.419554	0.674811	NA
										Paenibacillus_macquariensis	1.00322	0.0381169	2.30631	0.0165272	0.986814	NA
										bacterium_NLAE-zl-G278	1.99497	1.08363	1.54425	0.701721	0.482853	NA
										bacterium_NLAE-zl-G272	0.898709	0.168695	2.65286	0.0635898	0.949297	NA
										bacterium_NLAE-zl-G275	0.325134	0.0150686	4.08047	0.00369285	0.997054	NA
										bacterium_SCGC_AAA018-K16	0.494187	2.46194	3.1267	0.787392	0.431053	NA
										Terriglobus_roseus	0.653222	-1.50173	2.93323	-0.511972	0.608671	NA
										bacterium_NLAE-zl-C597	1.09539	-3.62124	2.75669	-1.31362	0.188974	NA
										Cellulophaga_lytica	2.39402	0.851053	1.81519	0.46885	0.639177	NA
										Corynebacterium_xerosis	0.320887	0.0150686	4.08047	0.00369285	0.997054	NA
										Lachnospiraceae_bacterium_DJF_VP34	0.360579	-1.96832	4.02942	-0.488488	0.625204	NA
										rumen_bacterium_R-9	0.449433	-2.26004	4.00737	-0.563971	0.572774	NA
										Clostridium_sp_T6014JC3	0.325134	0.0150686	4.08047	0.00369285	0.997054	NA
										Chryseobacterium_sp_THG-NC1	0.449272	0.842967	3.29699	0.255678	0.798199	NA
										Bacillus_sp_NBRC_101253	0.309163	1.79883	4.04493	0.444712	0.656528	NA
										Prevotella_sp_oral_taxon_473	0.482628	2.43267	3.99638	0.608719	0.542711	NA
										bacterium_NLAE-zl-C371	1.38692	-0.0378276	2.10484	-0.0179717	0.985661	NA
										Bacillus_sp_01082	0.360579	-1.96832	4.02942	-0.488488	0.625204	NA
										Cupriavidus_taiwanensis	0.589542	-2.66732	3.41576	-0.780888	0.434868	NA
										Megasphaera_sp_G1(2011)	1.35423	1.51491	2.21306	0.68453	0.493641	NA
										rumen_bacterium_R2_14	0.930486	-0.664965	3.02732	-0.219654	0.82614	NA
										Gemella_bergeri	0.634296	1.49934	2.64774	0.56627	0.57121	NA
										Clostridium_sp_MU01-5	0.3459	1.93908	4.03234	0.480882	0.630601	NA
										Bacillus_alcalophilus	2.05048	0.884102	1.60401	0.551182	0.581509	NA
										Clostridium_sp_CJ67	0.69389	-0.0638603	2.62416	-0.0243355	0.980585	NA
										Clostridiales_bacterium_canine_oral_taxon_142	0.482628	2.43267	3.99638	0.608719	0.542711	NA
										Clostridium_sp_SH-C52	1.56574	-1.32522	2.64949	-0.500181	0.616948	NA
										Helicobacter_sp_MIT_98-6170A	0.300985	0.0150686	4.08047	0.00369285	0.997054	NA
										bacterium_NLAE-zl-H448	1.28048	-0.387439	2.18788	-0.177084	0.859442	NA
										bacterium_NLAE-zl-H449	0.560438	-2.64856	3.98395	-0.664807	0.506174	NA
										bacterium_NLAE-zl-H444	0.370048	2.02522	4.02517	0.503139	0.614867	NA
										Clostridiales_bacterium_CAT_12a	0.525702	-1.00501	3.1602	-0.318021	0.750469	NA
										Tannerella_sp_oral_taxon_808	1.30549	0.334554	2.18255	0.153286	0.878173	NA
										Prevotella_oralis	0.74208	-0.414512	3.22126	-0.12868	0.897611	NA
										Burkholderia_sp_KJ006	1.18415	0.443123	2.00093	0.221458	0.824736	NA
										Bacteroides_sp_Tilapia2	0.3459	1.93908	4.03234	0.480882	0.630601	NA
										Eubacterium_sp_AGU8	2.60947	-0.381665	1.36477	-0.279655	0.779742	NA
										Helicobacter_sp_'Flexispira_taxon_7'	0.750258	0.662916	2.79887	0.236852	0.812772	NA
										Verrucomicrobiaceae_bacterium_DC2a-G7	0.370048	2.02522	4.02517	0.503139	0.614867	NA
[truncated: 2,513 more rows]
